# Supplementary material
Source: publisher figshare collection journal article supplement (https://acs.figshare.com/ndownloader/files/10325058)

## *Supporting Information*

# **Tandem Rh-Catalyzed [4+2] Vinylic C–H O-Annulation of Exocyclic Enones with Alkynes and 1,5-H Shift**

Yinsong Zhao, Chuangui Yu, Tianbao Wang, Zhijie She, Xuesong Zheng, Jingsong You and Ge Gao\*

*Key Laboratory of Green Chemistry and Technology of Ministry of Education, College of Chemistry, Sichuan University, 29 Wangjiang Road, Chengdu 610064, P. R. China*

\*E-mail: gg2b@scu.edu.cn

## **Table of Contents**

|                                                                                          |            |
|------------------------------------------------------------------------------------------|------------|
| <b>I. General Remarks .....</b>                                                          | <b>S2</b>  |
| <b>II. Preparation of Exocyclic Enones.....</b>                                          | <b>S2</b>  |
| <b>III. Rh-Catalyzed Annulation of Exocyclic Enones with Alkynes .....</b>               | <b>S4</b>  |
| <b>IV. Mechanism Study.....</b>                                                          | <b>S13</b> |
| <b>V. Conversion of 3 into Cationic O-Containing PHAs.....</b>                           | <b>S21</b> |
| <b>VI. References.....</b>                                                               | <b>S22</b> |
| <b>VII. Copies of <sup>1</sup>H, <sup>13</sup>C and <sup>19</sup>F NMR Spectra .....</b> | <b>S23</b> |

## I. General Remarks

All commercial available reagents were used without further purification unless otherwise noted. DCE was dried through manual solvent purification system from Innovative Technology. DME were dried by refluxing over sodium and freshly distilled prior to use.  $[\text{Cp}^*\text{RhCl}_2]_2$ ,<sup>1</sup> exocyclic enones **1**,<sup>2</sup> alkynes **2**,<sup>3</sup> and pyrylium tetrafluoroborate (**4**)<sup>4</sup> were prepared based on previous reports.

NMR spectra were measured on a Bruker AV II-400 MHz. The  $^1\text{H}$  NMR (400 MHz) chemical shifts were recorded relative to  $\text{CDCl}_3$  as the internal reference ( $\text{CDCl}_3$ :  $\delta$  7.26 ppm,  $(\text{CD}_3)_2\text{CO}$ :  $\delta$  2.05 ppm,  $(\text{CD}_3)_2\text{SO}$ :  $\delta$  2.50 ppm,  $\text{CD}_3\text{CN}$ :  $\delta$  1.94 ppm). The  $^{13}\text{C}$  NMR (100 MHz) chemical shifts were given using  $\text{CDCl}_3$  as the internal standard ( $\text{CDCl}_3$ :  $\delta$  77.16 ppm,  $(\text{CD}_3)_2\text{SO}$ :  $\delta$  39.52 ppm,  $\text{CD}_3\text{CN}$ :  $\delta$  1.32 ppm). High resolution mass spectra (HRMS) were collected on Waters-Q-TOF-Premier and Shimadzu LCMS-IT-TOF (ESI). X-Ray single-crystal diffraction data were obtained on an Agilent Technologies Gemini single crystal diffractometer. Melting points were measured with SGW<sub>®</sub>X-4/4A/4B and are uncorrected.

## II. Preparation of Exocyclic Enones<sup>2</sup>

To a mixture of a 3,4-dihydronaphthalen-2(1*H*)-one (2 mmol), an aryl aldehyde derivative (2 mmol) and 4Å molecular sieves (1.0 g) in toluene (4 mL) was added piperidine (24  $\mu\text{L}$ ) and AcOH (24  $\mu\text{L}$ ). The solution was stirred at room temperature for 24 h. Then the mixture was filtered through a celite pad and washed with EtOAc. The filtrate was then concentrated under vacuum and the residue was purified by flash chromatography on silica gel column (PE/EA = 20/1 ~ 5/1, v/v) to provide the desired enones.

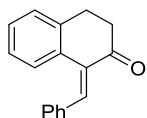

**(*E*)-1-Benzylidene-3,4-dihydronaphthalen-2(1*H*)-one (**1b**)**<sup>2</sup>: 355 mg, 76% yield, an off-white solid.  $^1\text{H}$  NMR (400 MHz,  $\text{CDCl}_3$ ):  $\delta$  = 2.63 (t,  $J$  = 6.0 Hz, 2H), 3.04 (t,  $J$  = 6.0 Hz, 2H), 7.00 (t,  $J$  = 7.6 Hz, 1H), 7.18-7.26 (m, 5H), 7.34 (d,  $J$  = 7.6 Hz, 1H), 7.40 (s, 2H), 7.68 (s, 1H) ppm.  $^{13}\text{C}$  NMR (100 MHz,  $\text{CDCl}_3$ ):  $\delta$  = 27.9, 37.1, 126.2, 128.0, 128.3, 128.6, 129.1, 129.2, 129.7, 132.7, 134.0, 135.3, 135.4, 138.6, 202.0 ppm.

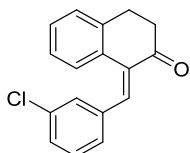

**(E)-1-(3-Chlorobenzylidene)-3,4-dihydronaphthalen-2(1H)-one (1l):** 422 mg, 79% yield, a light-yellow solid. M.p.: 78-80 °C.  $^1\text{H}$  NMR (400 MHz,  $\text{CDCl}_3$ ):  $\delta$  = 2.64 (t,  $J$  = 6.4 Hz, 2H), 3.05 (t,  $J$  = 6.4 Hz, 2H), 7.04 (t,  $J$  = 7.6 Hz, 1H), 7.05-7.29 (m, 5H), 7.38 (s, 1H), 7.58 (s, 1H) ppm.  $^{13}\text{C}$  NMR (100 MHz,  $\text{CDCl}_3$ ):  $\delta$  = 27.9, 37.0, 126.4, 127.7, 128.2, 128.7, 129.0, 129.2, 129.4, 129.8, 132.1, 133.5, 134.5, 135.1, 137.4, 138.7, 201.6 ppm. HRMS ( $\text{ESI}^+$ ): calcd for  $\text{C}_{17}\text{H}_{13}\text{ClNaO}$   $[\text{M}+\text{Na}]^+$  291.0547 found 291.0550.

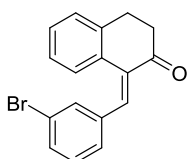

**(E)-1-(3-Bromobenzylidene)-3,4-dihydronaphthalen-2(1H)-one (1j):** 530 mg, 85% yield, a light-yellow solid. M.p.: 89-90 °C.  $^1\text{H}$  NMR (400 MHz,  $\text{CDCl}_3$ ):  $\delta$  = 2.63 (t,  $J$  = 6.4 Hz, 2H), 3.05 (t,  $J$  = 6.4 Hz, 2H), 7.04 (t,  $J$  = 7.6 Hz, 1H), 7.12 (t,  $J$  = 8.0 Hz, 1H), 7.21-7.32 (m, 4H), 7.39 (d,  $J$  = 8.0 Hz, 1H), 7.54 (s, 1H), 7.57 (s, 1H) ppm.  $^{13}\text{C}$  NMR (100 MHz,  $\text{CDCl}_3$ ):  $\delta$  = 27.9, 37.0, 122.6, 126.4, 128.1, 128.2, 128.7, 129.2, 130.1, 131.9, 132.0, 132.3, 133.3, 135.1, 137.6, 138.7, 201.6 ppm. HRMS ( $\text{ESI}^+$ ): calcd for  $\text{C}_{17}\text{H}_{13}\text{BrNaO}$   $[\text{M}+\text{Na}]^+$  335.0042 found 335.0047.

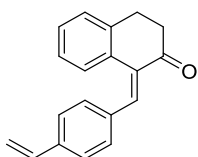

**(E)-1-(4-Vinylbenzylidene)-3,4-dihydronaphthalen-2(1H)-one (1m):** 431 mg, 83% yield, an off-white solid. M.p.: 115-117 °C.  $^1\text{H}$  NMR (400 MHz,  $\text{CDCl}_3$ ):  $\delta$  = 2.63 (t,  $J$  = 6.4 Hz, 2H), 3.04 (t,  $J$  = 6.4 Hz, 2H), 5.28 (d,  $J$  = 10.8 Hz, 1H), 5.77 (d,  $J$  = 17.6 Hz, 1H), 6.68 (dd,  $J$  = 17.6 Hz, 10.8 Hz, 1H), 7.03 (t,  $J$  = 7.6 Hz, 1H), 7.20-7.31 (m, 3H), 7.39-7.41 (m, 3H), 7.65 (s, 1H) ppm.  $^{13}\text{C}$  NMR (100 MHz,  $\text{CDCl}_3$ ):  $\delta$  = 27.9, 37.1, 115.0, 126.29, 126.34, 128.0, 128.3, 129.2, 130.1, 132.8, 133.8, 134.8, 135.0, 136.4, 138.4, 138.6, 201.9 ppm. HRMS ( $\text{ESI}^+$ ): calcd for  $\text{C}_{19}\text{H}_{17}\text{O}$   $[\text{M}+\text{H}]^+$  261.1274 found 261.1275.

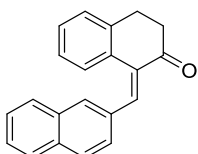

**(E)-1-(Naphthalen-2-ylmethylene)-3,4-dihydronaphthalen-2(1H)-one (1n):** 299 mg, 78% yield, a thick oil.  $^1\text{H}$  NMR (400 MHz,  $\text{CDCl}_3$ ):  $\delta$  = 2.67 (t,  $J$  = 6.8 Hz, 2H), 3.09 (t,  $J$  = 6.8 Hz, 2H), 6.99 (td,  $J$  = 7.6 Hz, 1.2 Hz, 1H), 7.25 (td,  $J$  = 7.6 Hz, 1.2 Hz, 1H), 7.30 (d,  $J$  = 7.6 Hz, 1H), 7.36 (d,  $J$  = 7.6 Hz, 1H), 7.43-7.49 (m, 3H), 7.65 (d,  $J$  = 8.4 Hz, 1H), 7.75-7.79 (m, 2H), 7.86 (s, 1H), 7.95 (s, 1H) ppm.  $^{13}\text{C}$  NMR (100 MHz,  $\text{CDCl}_3$ ):  $\delta$  = 28.0, 37.2, 126.27, 126.34, 126.5, 127.0, 127.8, 127.83, 128.0, 128.4, 128.5, 129.3, 130.6, 132.8, 133.0, 133.5, 133.6, 134.0, 135.4, 138.6, 201.9 ppm. HRMS ( $\text{ESI}^+$ ): calcd for  $\text{C}_{21}\text{H}_{17}\text{O}$   $[\text{M}+\text{H}]^+$  285.1274 found 285.1271.

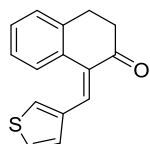

**(E)-1-(Thiophen-3-ylmethylene)-3,4-dihydronaphthalen-2(1H)-one (1q):** 311 mg, 65% yield, an off-white solid. M.p.: 76-78°C.  $^1\text{H}$  NMR (400 MHz,  $\text{CDCl}_3$ ):  $\delta$  = 2.60 (t,  $J$  = 6.0 Hz, 2H), 3.00 (t,  $J$  = 6.0 Hz, 2H), 7.11-7.19 m, 3H), 7.22-7.29 (m, 2H), 7.53-7.55 (m, 2H), 7.63 (s, 1H) ppm.  $^{13}\text{C}$  NMR (100 MHz,  $\text{CDCl}_3$ ):  $\delta$  = 27.9, 37.1, 125.7, 126.2, 127.6, 127.9, 128.4, 129.0, 129.1, 129.7, 132.7, 133.0, 136.7, 138.6, 202.2 ppm. HRMS ( $\text{ESI}^+$ ): calcd for  $\text{C}_{15}\text{H}_{13}\text{OS}$   $[\text{M}+\text{H}]^+$  241.0682 found 241.0682.

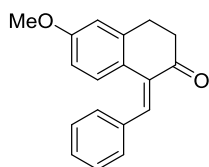

**(E)-1-Benzylidene-6-methoxy-3,4-dihydronaphthalen-2(1H)-one (1r):** 420 mg, 80% yield, a light-yellow solid. M.p.: 80-82 °C.  $^1\text{H}$  NMR (400 MHz,  $\text{CDCl}_3$ ):  $\delta$  = 2.62 (t,  $J$  = 6.4 Hz, 2H), 3.01 (t,  $J$  = 6.4 Hz, 2H), 3.82 (s, 3H), 6.57 (dd,  $J$  = 8.4 Hz, 2.4 Hz, 1H), 6.80 (d,  $J$  = 2.8 Hz, 1H), 7.25-7.28 (m, 4H), 7.41-7.43 (m, 2H), 7.60 (s, 1H) ppm.  $^{13}\text{C}$  NMR (100 MHz,  $\text{CDCl}_3$ ):  $\delta$  = 28.2, 37.2, 55.4, 112.2, 113.0, 125.1, 128.5, 128.8, 129.6, 130.6, 133.4, 133.5, 135.7, 140.2, 159.6, 202.0 ppm. HRMS ( $\text{ESI}^+$ ): calcd for  $\text{C}_{18}\text{H}_{17}\text{O}_2$   $[\text{M}+\text{H}]^+$  265.1223 found 265.1225.

### III. Rh-Catalyzed Annulation of Exocyclic Enones with Alkynes

**General procedure:** A Schlenk tube containing an exocyclic enones **1** (0.2 mmol), an alkyne **2** (0.24 mmol),  $[\text{Cp}^*\text{Rh}(\text{CH}_3\text{CN})_3](\text{SbF}_6)_2$  (16.6 mg, 10 mol %),  $\text{Cu}(\text{OAc})_2 \cdot \text{H}_2\text{O}$  (79.2 mg, 0.4 mmol),  $\text{Cu}_2\text{O}$  (14.1 mg, 0.1 mmol) and DCM (1 mL) was sealed with a teflon-coated screw cap and the mixture was stirred at 100 °C for 24-48 h. After cooled down to room temperature, the mixture was filtered

through a celite pad and washed with DCM. The filtrate was then concentrated under reduced pressure and the residue was purified by flash chromatography on silica gel column (PE/DCM=15:1~10:1) to provide the final product. (For 1 mmol scale synthesis, 234 mg **1b**, 213 mg **2a**, [Cp\*Rh(CH<sub>3</sub>CN)<sub>3</sub>](SbF<sub>6</sub>)<sub>2</sub> (10 mol %), Cu(OAc)<sub>2</sub>·H<sub>2</sub>O (2.0 eq.), Cu<sub>2</sub>O (0.5 eq.) and DCM (5 mL) were used instead.)

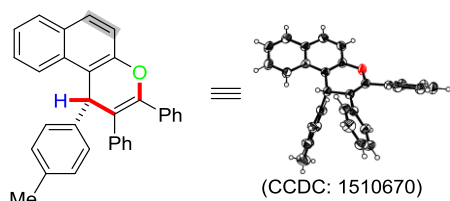

**2,3-Diphenyl-1-(p-tolyl)-1H-benzo[f]chromene (3a):** 24 h, 63.6 mg, 75% yield, a white solid. M.p.: 85-87 °C. <sup>1</sup>H NMR (400 MHz, CDCl<sub>3</sub>): δ = 2.25 (s, 3H), 5.36 (s, 1H), 7.01-7.03 (m, 4H), 7.16-7.25 (m, 8H), 7.34-7.45 (m, 5H), 7.76-7.81 (m, 2H), 7.96 (d, *J* = 8.8 Hz, 1H) ppm. <sup>13</sup>C NMR (100 MHz, CDCl<sub>3</sub>): δ = 21.2, 44.9, 116.5, 117.2, 117.9, 123.1, 124.2, 126.7, 126.9, 127.9, 128.2, 128.4, 128.57, 128.64, 129.34, 129.36, 130.2, 131.17, 131.25, 135.0, 136.2, 139.9, 142.2, 146.0, 149.2 ppm. HRMS (ESI<sup>+</sup>): calcd for C<sub>32</sub>H<sub>25</sub>O [M+H]<sup>+</sup> 425.1900, found 425.1902.

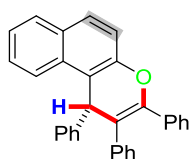

**1,2,3-Triphenyl-1H-benzo[f]chromene (3b):** 24 h, 59.9 mg, 73% yield (For a 1 mmol scale, 275 mg, 67% yield, 48 h), a white solid. M.p.: 118-120 °C. <sup>1</sup>H NMR (400 MHz, CDCl<sub>3</sub>): δ = 5.39 (s, 1H), 6.98 (m, 2H), 7.13-7.21 (m, 9H), 7.32-7.45 (m, 7H), 7.78-7.82 (m, 2H), 7.94 (d, *J* = 8.8 Hz, 1H) ppm. <sup>13</sup>C NMR (100 MHz, CDCl<sub>3</sub>): δ = 45.5, 116.4, 116.9, 118.0, 123.1, 124.3, 126.7, 126.8, 126.9, 127.9, 128.2, 128.3, 128.58, 128.62, 128.66, 128.72, 129.3, 130.2, 131.2, 131.3, 134.9, 139.8, 145.2, 146.0, 149.2 ppm. HRMS (ESI<sup>+</sup>): calcd for C<sub>31</sub>H<sub>22</sub>NaO [M+Na]<sup>+</sup> 433.1563, found 433.1571.

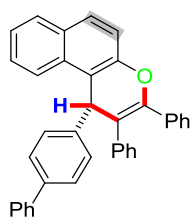

**1-([1,1'-Biphenyl]-4-yl)-2,3-diphenyl-1H-benzo[f]chromene (3c):** 24 h, 66.1 mg, 68% yield, a white solid. M.p.: 112-123 °C. <sup>1</sup>H NMR (400 MHz, CDCl<sub>3</sub>): δ = 5.43 (s, 1H), 7.03-7.06 (m, 2H), 7.18-7.24 (m, 6H), 7.30 (t, *J* = 7.6 Hz, 1H), 7.37-7.49 (m, 11H), 7.53 (d, *J* = 7.2 Hz, 2H), 7.80-7.84 (m, 2H), 8.00 (d, *J* = 8.8 Hz, 1H) ppm. <sup>13</sup>C NMR (100 MHz, CDCl<sub>3</sub>): δ = 45.1, 116.2, 116.9, 118.0,

123.1, 124.3, 126.8, 126.97, 127.04, 127.2, 127.3, 127.9, 128.3, 128.4, 128.7, 128.75, 128.8, 128.9, 129.4, 130.2, 131.18, 131.24, 134.9, 139.4, 139.8, 140.9, 144.2, 146.2, 149.2 ppm. HRMS (ESI<sup>+</sup>): calcd for C<sub>37</sub>H<sub>27</sub>O [M+H]<sup>+</sup> 487.2056, found 487.2060.

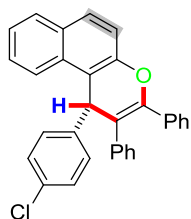

**1-(4-Chlorophenyl)-2,3-diphenyl-1H-benzo[f]chromene (3d):** 24 h, 62.1 mg, 70% yield, a white solid. M.p.: 124-126 °C. <sup>1</sup>H NMR (400 MHz, CDCl<sub>3</sub>): δ = 5.38 (s, 1H), 6.97-6.98 (m, 2H), 7.15-7.20 (m, 10H), 7.35-7.44 (m, 5H), 7.78-7.85 (m, 3H) ppm. <sup>13</sup>C NMR (100 MHz, CDCl<sub>3</sub>): δ = 45.0, 116.0, 116.2, 118.0, 122.9, 124.4, 126.9, 127.1, 127.9, 128.3, 128.5, 128.8, 129.0, 129.3, 129.8, 130.2, 131.1, 131.2, 132.4, 134.7, 139.5, 143.7, 146.1, 149.3 ppm. HRMS (ESI<sup>+</sup>): calcd for C<sub>31</sub>H<sub>2</sub>ClNaO [M+Na]<sup>+</sup> 467.1173, found 467.1176.

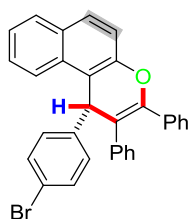

**1-(4-Bromophenyl)-2,3-diphenyl-1H-benzo[f]chromene (3e):** 24 h, 63.4 mg, 65% yield, a white solid. M.p.: 82-84 °C. <sup>1</sup>H NMR (400 MHz, CDCl<sub>3</sub>): δ = 5.35 (s, 1H), 6.97-6.98 (m, 2H), 7.15-7.21 (m, 8H), 7.30-7.44 (m, 7H), 7.78-7.84 (m, 3H) ppm. <sup>13</sup>C NMR (100 MHz, CDCl<sub>3</sub>): δ = 45.0, 115.9, 116.1, 118.0, 120.6, 122.9, 124.4, 126.9, 127.1, 127.9, 128.4, 128.5, 128.9, 129.0, 129.3, 130.15, 130.19, 131.1, 131.2, 134.7, 139.4, 144.2, 146.2, 149.3 ppm. HRMS (ESI<sup>+</sup>): calcd for C<sub>31</sub>H<sub>22</sub>BrO [M+H]<sup>+</sup> 489.0849, found 489.0855.

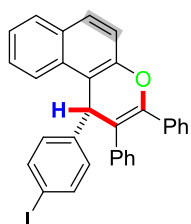

**1-(4-Iodophenyl)-2,3-diphenyl-1H-benzo[f]chromene (3f):** 24h, 67.2 mg, 60% yield, a white solid. M.p.: 135-137 °C. <sup>1</sup>H NMR (400 MHz, CDCl<sub>3</sub>): δ = 5.39 (s, 1H), 6.96-6.97 (m, 2H), 7.04 (d, *J* = 7.6 Hz, 2H), 7.19-7.21 (m, 6H), 7.34-7.43 (m, 5H), 7.51 (d, *J* = 7.2 Hz, 2H), 7.78-7.84 (m, 3H) ppm. <sup>13</sup>C NMR (100 MHz, CDCl<sub>3</sub>): δ = 45.1, 115.9, 116.1, 117.9, 122.9, 124.4, 126.9, 127.1, 127.9,

128.4, 128.5, 128.8, 129.0, 129.3, 130.1, 130.5, 131.1, 131.2, 134.7, 137.7, 139.4, 144.9, 146.2, 149.2 ppm. HRMS (ESI<sup>+</sup>): calcd for C<sub>31</sub>H<sub>22</sub>IO [M+H]<sup>+</sup> 537.0710, found 537.0713.

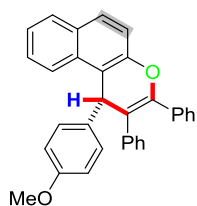

**1-(4-Methoxyphenyl)-2,3-diphenyl-1H-benzo[f]chromene (3g):** 24 h, 58.1 mg, 66% yield, a white solid. M.p.: 70-72 °C. <sup>1</sup>H NMR (400 MHz, CDCl<sub>3</sub>): δ = 3.72 (s, 3H), 5.33 (s, 1H), 6.74 (d, *J* = 8.0 Hz, 2H), 6.98-6.99 (m, 2H), 7.17-7.26 (m, 8H), 7.35-7.44 (m, 5H), 7.76-7.81 (m, 2H), 7.93 (d, *J* = 7.2 Hz, 1H) ppm. <sup>13</sup>C NMR (100 MHz, CDCl<sub>3</sub>): δ = 44.5, 55.3, 114.0, 116.6, 117.1, 118.0, 123.1, 124.2, 126.7, 126.9, 127.8, 128.2, 128.3, 128.6, 129.3, 129.5, 130.2, 131.16, 131.24, 135.0, 137.5, 139.9, 145.8, 149.1, 158.2 ppm. HRMS (ESI<sup>+</sup>): calcd for C<sub>32</sub>H<sub>24</sub>NaO<sub>2</sub> [M+Na]<sup>+</sup> 463.1669, found 463.1677.

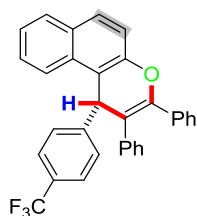

**2,3-Diphenyl-1-(4-(trifluoromethyl)phenyl)-1H-benzo[f]chromene (3h):** 36 h. 59.3 mg, 62% yield, a white solid. M.p.: 139-141 °C. <sup>1</sup>H NMR (400 MHz, CDCl<sub>3</sub>): δ = 5.50 (s, 1H), 6.96-6.98 (m, 2H), 7.19-7.26 (m, 6H), 7.36-7.47 (m, 9H), 7.81-7.86 (m, 3H) ppm. <sup>13</sup>C NMR (100 MHz, CDCl<sub>3</sub>): δ = 45.4, 115.7, 115.8, 118.0, 122.8, 124.3 (q, *J*<sub>CF</sub> = 276.7 Hz), 124.5, 125.62 (q, *J*<sub>CF</sub> = 3.8 Hz), 127.0, 127.2, 127.9, 128.4, 128.5, 128.7, 128.8, 128.9 (q, *J*<sub>CF</sub> = 31.0 Hz), 129.2, 129.3, 130.1, 131.0, 131.2, 139.3, 146.4, 149.0, 149.3 ppm. HRMS (ESI<sup>+</sup>): calcd for C<sub>32</sub>H<sub>21</sub>F<sub>3</sub>NaO [M+Na]<sup>+</sup> 501.1437, found 501.1443.

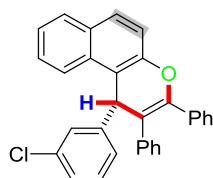

**1-(3-Chlorophenyl)-2,3-diphenyl-1H-benzo[f]chromene (3i):** 24 h, 56.8 mg, 64% yield, a white solid. M.p.: 132-134 °C. <sup>1</sup>H NMR (400 MHz, CDCl<sub>3</sub>): δ = 5.40 (s, 1H), 6.97-6.99 (m, 2H), 7.11-7.22 (m, 9H), 7.27 (s, 1H), 7.37-7.46 (m, 5H), 7.80-7.87 (m, 3H) ppm. <sup>13</sup>C NMR (100 MHz, CDCl<sub>3</sub>): δ = 45.3, 115.8, 115.9, 118.0, 122.9, 124.4, 126.7, 126.9, 127.0, 127.1, 127.9, 128.4, 128.47, 128.54, 128.8, 129.1, 129.3, 129.7, 130.1, 131.1, 131.2, 134.5, 134.6, 139.4, 146.2, 147.1, 149.3 ppm.

HRMS (ESI<sup>+</sup>): calcd for C<sub>31</sub>H<sub>22</sub>ClO [M+H]<sup>+</sup> 445.1354, found 445,1360.

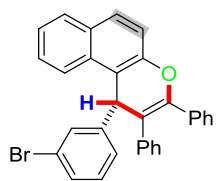

**1-(3-Bromophenyl)-2,3-diphenyl-1H-benzo[f]chromene (3j):** 24 h, 54.6 mg, 56% yield, a white solid. M.p.: 62-64 °C. <sup>1</sup>H NMR (400 MHz, CDCl<sub>3</sub>): δ = 5.37 (s, 1H), 6.97 (bs, 2H), 7.06 (t, *J* = 7.2 Hz, 1H), 7.20-7.26 (m, 8H), 7.36-7.45 (m, 6H), 7.80-7.86 (m, 3H) ppm. <sup>13</sup>C NMR (100 MHz, CDCl<sub>3</sub>): δ = 45.3, 115.8, 118.0, 122.8, 122.9, 124.4, 127.0, 127.1, 127.2, 127.9, 128.4, 128.5, 128.8, 129.1, 129.3, 129.9, 130.07, 130.14, 131.1, 131.2, 131.4, 134.6, 139.4, 146.2, 147.4, 149.3 ppm. HRMS (ESI<sup>+</sup>): calcd for C<sub>31</sub>H<sub>22</sub>BrO [M+H]<sup>+</sup> 489.0849, found 489.0858.

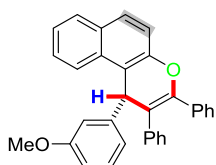

**1-(3-Methoxyphenyl)-2,3-diphenyl-1H-benzo[f]chromene (3k):** 24 h, 59.8 mg, 68% yield, a white solid. M.p.: 53-55 °C. <sup>1</sup>H NMR (400 MHz, CDCl<sub>3</sub>): δ = 3.67 (s, 3H), 5.38 (s, 1H), 6.68 (d, *J* = 8.4 Hz, 1H), 6.87 (s, 1H), 6.93 (d, *J* = 7.6 Hz, 1H), 7.00-7.01 (m, 2H), 7.11-7.22 (m, 7H), 7.37-7.45 (m, 5H), 7.78-7.82 (m, 2H), 7.96 (d, *J* = 8.4 Hz, 1H) ppm. <sup>13</sup>C NMR (100 MHz, CDCl<sub>3</sub>): δ = 45.4, 55.2, 111.8, 114.5, 116.2, 116.7, 118.0, 121.1, 123.1, 124.3, 126.8, 126.9, 127.8, 128.2, 128.3, 128.6, 128.7, 129.3, 129.4, 130.2, 131.2, 131.3, 134.9, 139.8, 146.1, 146.7, 149.2, 159.8 ppm. HRMS (ESI<sup>+</sup>): calcd for C<sub>32</sub>H<sub>24</sub>O<sub>2</sub> [M+Na]<sup>+</sup> 463.1669, found 463.1679.

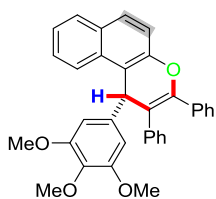

**2,3-Diphenyl-1-(3,4,5-trimethoxyphenyl)-1H-benzo[f]chromene (3l):** 48 h. 57 mg, 57% yield, a white solid. M.p.: 158-160 °C. <sup>1</sup>H NMR (400 MHz, CDCl<sub>3</sub>): δ = 3.67 (s, 6H), 3.76 (s, 3H), 5.32 (s, 1H), 6.48 (s, 2H), 7.00-7.01 (m, 6H), 7.37-7.47 (m, 6H), 7.79-7.84 (m, 2H), 7.95 (d, *J* = 8.4 Hz, 1H) ppm. <sup>13</sup>C NMR (100 MHz, CDCl<sub>3</sub>): δ = 45.6, 56.2, 60.9, 105.7, 110.2, 116.3, 116.5, 118.0, 123.2, 124.3, 126.7, 127.0, 127.9, 128.29, 128.33, 128.7, 128.8, 129.3, 130.3, 131.2, 131.4, 134.9, 136.8, 139.7, 140.6, 146.0, 149.4, 153.2 ppm. HRMS (ESI<sup>+</sup>): calcd for C<sub>34</sub>H<sub>29</sub>O<sub>4</sub> [M+H]<sup>+</sup> 501.2060, found 501.2069.



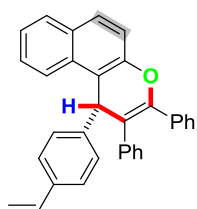

**2,3-Diphenyl-1-(4-vinylphenyl)-1H-benzo[f]chromene (3m):** 24 h, 54.9 mg, 63% yield, a white solid. M.p.: 80-82 °C.  $^1\text{H}$  NMR (400 MHz,  $\text{CDCl}_3$ ):  $\delta$  = 5.16 (d,  $J$  = 10.8 Hz, 1H), 5.39 (s, 1H), 5.65 (d,  $J$  = 17.6 Hz, 1H), 6.62 (dd,  $J$  = 17.6 Hz, 10.8 Hz, 1H), 6.99-7.00 (m, 2H), 7.16-7.30 (m, 10H), 7.34-7.45 (m, 5H), 7.77-7.82 (m, 2H), 7.93 (d,  $J$  = 8.4 Hz, 1H) ppm.  $^{13}\text{C}$  NMR (100 MHz,  $\text{CDCl}_3$ ):  $\delta$  = 45.2, 113.5, 116.2, 116.7, 118.0, 123.0, 124.3, 126.6, 126.8, 127.0, 127.9, 128.3, 128.68, 128.71, 128.8, 129.3, 130.2, 131.19, 131.25, 134.9, 136.0, 136.6, 139.8, 144.9, 146.1, 149.2 ppm. HRMS ( $\text{ESI}^+$ ): calcd for  $\text{C}_{33}\text{H}_{25}\text{O}$   $[\text{M}+\text{H}]^+$  437.1900, found 437.1902.

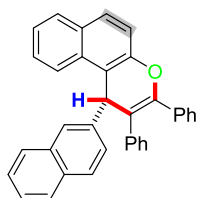

**1-(Naphthalen-2-yl)-2,3-diphenyl-1H-benzo[f]chromene (3n):** 36 h, 59.8 mg, 65% yield, a white solid. M.p.: 74-76 °C.  $^1\text{H}$  NMR (400 MHz,  $\text{CDCl}_3$ ):  $\delta$  = 5.56 (s, 1H), 6.97-6.98 (m, 2H), 7.13-7.22 (m, 6H), 7.32-7.49 (m, 8H), 7.69-7.75 (m, 4H), 7.79-7.81 (m, 2H), 8.01 (d,  $J$  = 8.4 Hz, 1H) ppm.  $^{13}\text{C}$  NMR (100 MHz,  $\text{CDCl}_3$ ):  $\delta$  = 45.6, 116.2, 116.7, 118.0, 123.1, 124.3, 125.7, 126.0, 126.8, 126.9, 127.0, 127.7, 127.9, 128.1, 128.3, 128.4, 128.6, 128.7, 128.9, 129.4, 130.2, 131.2, 131.3, 132.5, 133.4, 134.9, 139.8, 142.5, 146.2, 149.3 ppm. HRMS ( $\text{ESI}^+$ ): calcd for  $\text{C}_{35}\text{H}_{24}\text{NaO}$   $[\text{M}+\text{Na}]^+$  483.1719, found 483.1722.

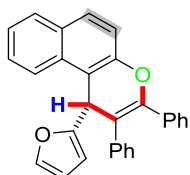

**1-(Furan-2-yl)-2,3-diphenyl-1H-benzo[f]chromene (3o):** 24 h, 47.2 mg, 59% yield, a white solid. M.p.: 140-142 °C.  $^1\text{H}$  NMR (400 MHz,  $\text{CDCl}_3$ ):  $\delta$  = 5.55 (s, 1H), 6.16 (brs, 1H), 6.23 (brs, 1H), 7.12-7.26 (m, 9H), 7.38-7.42 (m, 4H), 7.50 (t,  $J$  = 8.0 Hz, 1H), 7.78 (d,  $J$  = 8.8 Hz, 1H), 7.83 (d,  $J$  = 8.0 Hz, 1H), 8.09 (d,  $J$  = 8.4 Hz, 1H) ppm.  $^{13}\text{C}$  NMR (100 MHz,  $\text{CDCl}_3$ ):  $\delta$  = 38.4, 106.8, 110.6, 112.7, 114.9, 117.9, 122.9, 124.4, 126.8, 127.0, 128.0, 128.4, 128.5, 128.6, 128.8, 129.6, 129.9, 131.1, 131.3, 134.8, 139.6, 141.7, 147.9, 149.4, 156.8 ppm. HRMS ( $\text{ESI}^+$ ): calcd for  $\text{C}_{29}\text{H}_{21}\text{O}_2$

$[M+H]^+$  401.1536, found 401.1529.

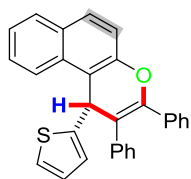

**2,3-Diphenyl-1-(thiophen-2-yl)-1H-benzo[f]chromene (3p):** 24 h, 54.1 mg, 65% yield, a white solid. M.p.: 130-132 °C.  $^1\text{H}$  NMR (400 MHz,  $\text{CDCl}_3$ ):  $\delta$  = 5.77 (s, 1H), 6.85 (t,  $J$  = 3.6 Hz, 1H), 6.97 (d,  $J$  = 3.2 Hz, 1H), 7.11 (d,  $J$  = 4.4 Hz, 1H), 7.15-7.27 (m, 8H), 7.40-7.55 (m, 4H), 7.80 (d,  $J$  = 8.8 Hz, 1H), 7.85 (d,  $J$  = 8.0 Hz, 1H), 8.11 (d,  $J$  = 8.4 Hz, 1H) ppm.  $^{13}\text{C}$  NMR (100 MHz,  $\text{CDCl}_3$ ):  $\delta$  = 39.7, 115.4, 117.0, 118.0, 122.8, 124.4, 124.5, 124.7, 126.7, 126.9, 127.1, 128.0, 128.4, 128.5, 128.8, 129.5, 130.1, 130.9, 131.2, 134.7, 139.4, 147.2, 149.0, 149.3 ppm. HRMS ( $\text{ESI}^+$ ): calcd for  $\text{C}_{29}\text{H}_{21}\text{OS}$   $[M+H]^+$  417.1308, found 417.1313.

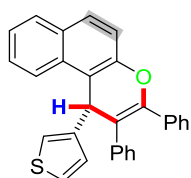

**2,3-Diphenyl-1-(thiophen-3-yl)-1H-benzo[f]chromene (3q):** 24 h, 51.6 mg, 62% yield, a white solid. M.p.: 150-152 °C.  $^1\text{H}$  NMR (400 MHz,  $\text{CDCl}_3$ ):  $\delta$  = 5.56 (s, 1H), 7.00 (d,  $J$  = 4.0 Hz, 1H), 7.08-7.26 (m, 10H), 7.38-7.49 (m, 5H), 7.79 (d,  $J$  = 8.8 Hz, 1H), 7.83 (d,  $J$  = 8.0 Hz, 1H), 8.02 (d,  $J$  = 8.4 Hz, 1H) ppm.  $^{13}\text{C}$  NMR (100 MHz,  $\text{CDCl}_3$ ):  $\delta$  = 40.3, 115.6, 116.9, 117.9, 121.4, 122.8, 124.3, 125.9, 126.8, 127.0, 127.8, 127.9, 128.35, 128.38, 128.6, 128.7, 129.4, 130.0, 131.1, 134.8, 139.8, 145.4, 146.7, 149.2 ppm. HRMS ( $\text{ESI}^+$ ): calcd for  $\text{C}_{29}\text{H}_{20}\text{NaOS}$   $[M+\text{Na}]^+$  439.1127, found 439.1137.

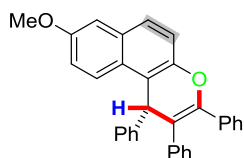

**8-Methoxy-1,2,3-triphenyl-1H-benzo[f]chromene (3r):** 24 h, 67.8 mg, 77% yield, a white solid. M.p.: 75-77 °C.  $^1\text{H}$  NMR (400 MHz,  $\text{CDCl}_3$ ):  $\delta$  = 3.72 (s, 3H), 5.35 (s, 1H), 6.76 (d,  $J$  = 8.0 Hz, 1H), 6.99-7.01 (m, 2H), 7.16-7.26 (m, 8H), 7.34-7.45 (m, 5H), 7.78 (d,  $J$  = 8.8 Hz, 1H), 7.81 (d,  $J$  = 8.0 Hz, 1H), 7.95 (d,  $J$  = 8.4 Hz, 1H) ppm.  $^{13}\text{C}$  NMR (100 MHz,  $\text{CDCl}_3$ ):  $\delta$  = 44.6, 55.3, 114.0, 116.6, 117.1, 118.0, 123.1, 124.2, 126.7, 126.9, 127.8, 128.2, 128.3, 128.6, 128.7, 129.3, 129.5, 130.2, 131.19, 131.25, 135.0, 137.5, 139.9, 145.8, 149.2, 158.3 ppm. HRMS ( $\text{ESI}^+$ ): calcd for  $\text{C}_{32}\text{H}_{25}\text{O}_2$   $[M+H]^+$  441.1849, found 441.1853.

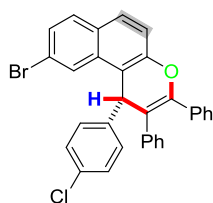

**9-Bromo-1-(4-chlorophenyl)-2,3-diphenyl-1H-benzo[f]chromene (3s):** 36 h. 65.8 mg, 63% yield, a white solid.  $^1\text{H}$  NMR (400 MHz,  $\text{CDCl}_3$ ):  $\delta$  = 5.30 (s, 1H), 6.98-6.99 (m, 2H), 7.17 -7.27 (m, 8H), 7.34-7.47 (m, 6H), 7.66 (d,  $J$  = 9.6 Hz, 1H), 7.81 (d,  $J$  = 7.6 Hz, 1H), 8.11 (s, 1H) ppm.  $^{13}\text{C}$  NMR (100 MHz,  $\text{CDCl}_3$ ):  $\delta$  = 45.4, 116.3, 116.4, 118.4, 121.3, 125.6, 126.9, 127.1, 127.6, 127.9, 128.35, 128.38, 128.5, 128.6, 128.8, 129.3, 129.6, 130.1, 130.2, 132.6, 134.6, 139.5, 144.7, 146.0, 149.8 ppm. HRMS ( $\text{ESI}^+$ ): calcd for  $\text{C}_{31}\text{H}_{21}\text{BrClO}$   $[\text{M}+\text{H}]^+$  523.0459, found 523.0466.

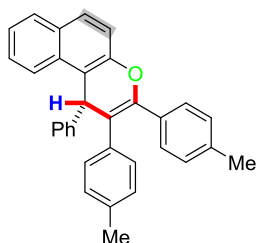

**1-Phenyl-2,3-di-p-tolyl-1H-benzo[f]chromene (3t):** 24 h, 60 mg, 69% yield, a white solid. M.p.: 136-138  $^{\circ}\text{C}$ .  $^1\text{H}$  NMR (400 MHz,  $\text{CDCl}_3$ ):  $\delta$  = 2.30 (brs, 6H), 5.34 (s, 1H), 6.87 (d,  $J$  = 8.0 Hz, 2H), 6.97 (d,  $J$  = 8.0 Hz, 2H), 7.02 (d,  $J$  = 8.0 Hz, 2H), 7.12 (t,  $J$  = 7.6 Hz, 1H), 7.21 (t,  $J$  = 7.6 Hz, 2H), 7.26-7.29 (m, 2H), 7.33-7.37 (m, 3H), 7.40-7.44 (m, 2H), 7.76-7.81 (m, 2H), 7.95 (d,  $J$  = 7.6 Hz, 1H) ppm.  $^{13}\text{C}$  NMR (100 MHz,  $\text{CDCl}_3$ ):  $\delta$  = 21.36, 21.43, 45.5, 115.7, 117.1, 118.0, 123.1, 124.2, 126.6, 126.7, 128.57, 128.58, 128.59, 128.63, 129.0, 129.2, 129.9, 131.1, 131.3, 132.2, 136.4, 137.0, 138.0, 145.4, 145.9, 149.2 ppm. HRMS ( $\text{ESI}^+$ ): calcd for  $\text{C}_{33}\text{H}_{27}\text{O}$   $[\text{M}+\text{H}]^+$  439.2056, found 439.2068.

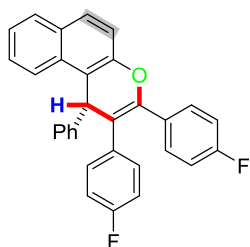

**2,3-Bis(4-fluorophenyl)-1-phenyl-1H-benzo[f]chromene (3u):** 36 h. 55.3 mg, 62% yield, a white solid. M.p.: 145-147  $^{\circ}\text{C}$ .  $^1\text{H}$  NMR (400 MHz,  $\text{CDCl}_3$ ):  $\delta$  = 5.32 (s, 1H), 6.84-6.92 (m, 6H), 7.13 (t,  $J$  = 7.2 Hz, 1H), 7.19-7.24 (m, 2H), 7.26-7.45 (m, 7H), 7.78-7.82 (m, 2H), 7.90 (d,  $J$  = 8.0 Hz, 1H) ppm.  $^{13}\text{C}$  NMR (100 MHz,  $\text{CDCl}_3$ ):  $\delta$  = 45.6, 115.0 (d,  $J_{\text{CF}}$  = 21.4 Hz), 115.43, 115.44 (d,  $J_{\text{CF}}$  = 21.2 Hz), 116.5, 117.8, 123.1, 124.4, 126.8, 128.5, 128.69, 128.72, 128.9, 130.8 (d,  $J_{\text{CF}}$  = 3.4 Hz), 131.1 (d,  $J_{\text{CF}}$  = 8.1 Hz), 131.22, 131.24, 131.7 (d,  $J_{\text{CF}}$  = 7.8 Hz), 135.47, 135.51, 144.9, 145.2, 149.0, 161.9

(d,  $J_{CF} = 244.9$  Hz), 162.5 (d,  $J_{CF} = 247.3$  Hz) ppm. HRMS (ESI<sup>+</sup>): calcd for C<sub>31</sub>H<sub>20</sub>F<sub>2</sub>NaO [M+Na]<sup>+</sup> 469.1374, found 469.1383.

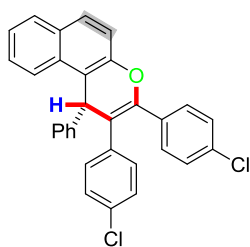

**2,3-Bis(4-chlorophenyl)-1-phenyl-1H-benzo[f]chromene (3v):** 36 h. 56.5 mg, 59% yield, a white solid. M.p.: 170-172 °C. <sup>1</sup>H NMR (400 MHz, CDCl<sub>3</sub>):  $\delta$  = 5.31 (s, 1H), 6.86-6.88 (m, 2H), 7.11-7.28 (m, 11H), 7.34-7.44 (m, 3H), 7.78-7.81 (m, 2H), 7.89 (d,  $J = 8.4$  Hz, 1H) ppm. <sup>13</sup>C NMR (100 MHz, CDCl<sub>3</sub>):  $\delta$  = 45.4, 115.8, 116.4, 117.8, 123.1, 124.5, 126.92, 126.93, 128.3, 128.5, 128.7, 128.8, 129.0, 130.6, 131.17, 131.24, 131.4, 133.0, 134.3, 137.9, 144.7, 145.2, 148.9 ppm. HRMS (ESI<sup>+</sup>): calcd for C<sub>31</sub>H<sub>20</sub>Cl<sub>2</sub>NaO [M+Na]<sup>+</sup> 501.0783, found 501.0786.

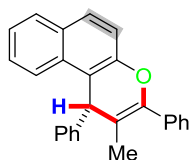

**2-Methyl-1,3-diphenyl-1H-benzo[f]chromene (3w):** 24 h, 48.7 mg, 70% yield, a white solid. M.p.: 156-158 °C. <sup>1</sup>H NMR (400 MHz, CDCl<sub>3</sub>):  $\delta$  = 1.84 (s, 3H), 5.00 (s, 1H), 7.15 (t,  $J = 7.2$  Hz, 1H), 7.26-7.43 (m, 10H), 7.52 (d,  $J = 7.2$  Hz, 2H), 7.73-7.79 (m, 2H), 7.85 (d,  $J = 8.4$  Hz, 1H) ppm. <sup>13</sup>C NMR (100 MHz, CDCl<sub>3</sub>):  $\delta$  = 17.7, 45.4, 109.9, 115.3, 118.0, 123.2, 124.0, 126.6, 128.2, 128.4, 128.5, 128.6, 128.7, 129.3, 131.0, 131.6, 135.2, 143.6, 145.2, 149.4 ppm. HRMS (ESI<sup>+</sup>): calcd for C<sub>26</sub>H<sub>21</sub>O [M+H]<sup>+</sup> 349.1587, found 349.1591.

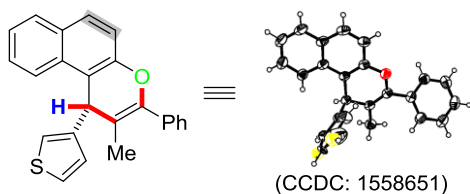

**2-Methyl-3-phenyl-1-(thiophen-3-yl)-1H-benzo[f]chromene (3x):** 36 h. 42.5 mg, 60% yield, a white solid. M.p.: 135-137 °C. <sup>1</sup>H NMR (400 MHz, CDCl<sub>3</sub>):  $\delta$  = 1.91 (s, 3H), 5.17 (s, 1H), 6.98-7.00 (m, 1H), 7.15-7.17 (m, 2H), 7.31 (d,  $J = 8.8$  Hz, 1H), 7.34-7.47 (m, 5H), 7.54 (d,  $J = 7.2$  Hz, 2H), 7.74 (d,  $J = 8.8$  Hz, 1H), 7.80 (d,  $J = 8.0$  Hz, 1H), 7.93 (d,  $J = 8.4$  Hz, 1H) ppm. <sup>13</sup>C NMR (100 MHz, CDCl<sub>3</sub>):  $\delta$  = 17.8, 40.2, 109.3, 115.1, 118.0, 121.1, 122.9, 124.0, 125.8, 126.6, 127.8, 128.2, 128.4, 128.6, 129.2, 130.9, 131.5, 135.1, 144.0, 145.4, 149.2 ppm. HRMS (ESI<sup>+</sup>): calcd for C<sub>24</sub>H<sub>19</sub>SO [M+H]<sup>+</sup> 355.1151, found 355.1556.

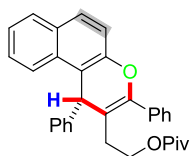

**2-(1,3-Diphenyl-1H-benzo[f]chromen-2-yl)ethyl pivalate (3y):** 36 h. 54.6 mg, 59% yield, a clear viscous oil.  $^1\text{H}$  NMR (400 MHz,  $\text{CDCl}_3$ ):  $\delta$  = 1.12 (s, 9H), 2.34-2.41 (m, 1H), 2.58-2.65 (m, 1H), 4.15-4.25 (m, 2H), 5.25 (s, 1H), 7.16 (t,  $J$  = 7.2 Hz, 1H), 7.26-7.46 (m, 10H), 7.54 (d,  $J$  = 7.2 Hz, 2H), 7.73 (d,  $J$  = 8.8 Hz, 1H), 7.78 (d,  $J$  = 8.0 Hz, 1H), 7.93 (d,  $J$  = 8.4 Hz, 1H) ppm.  $^{13}\text{C}$  NMR (100 MHz,  $\text{CDCl}_3$ ):  $\delta$  = 27.3, 29.2, 38.8, 41.9, 62.6, 110.3, 115.6, 117.8, 123.2, 124.2, 126.7, 126.8, 128.5, 128.6, 128.8, 128.9, 129.3, 131.1, 131.4, 134.8, 145.2, 146.7, 149.1, 178.7 ppm. HRMS (ESI $^+$ ): calcd for  $\text{C}_{32}\text{H}_{31}\text{O}_3$   $[\text{M}+\text{H}]^+$  463.2268, found 463.2275.

## IV. Mechanism Study

### 1. Experiment to verify the vinylic C–H bond cleavage

**Preparation of  $D_6$ -1b:** Following the general procedure by using  $D_6$ -benzaldehyde instead of benzaldehyde.  $D_6$ -1b was obtained as an off-white solid in 70% yield, (>99% D).  $^1\text{H}$  NMR (400 MHz,  $\text{CDCl}_3$ ):  $\delta$  = 2.63 (t,  $J$  = 6.8 Hz, 2H), 3.05 (t,  $J$  = 6.8 Hz, 2H), 7.02 (t,  $J$  = 7.6 Hz, 1H), 7.21 (t,  $J$  = 7.6 Hz, 1H), 7.26-7.29 (m, 1H), 7.36 (d,  $J$  = 8.0 Hz, 1H) ppm.

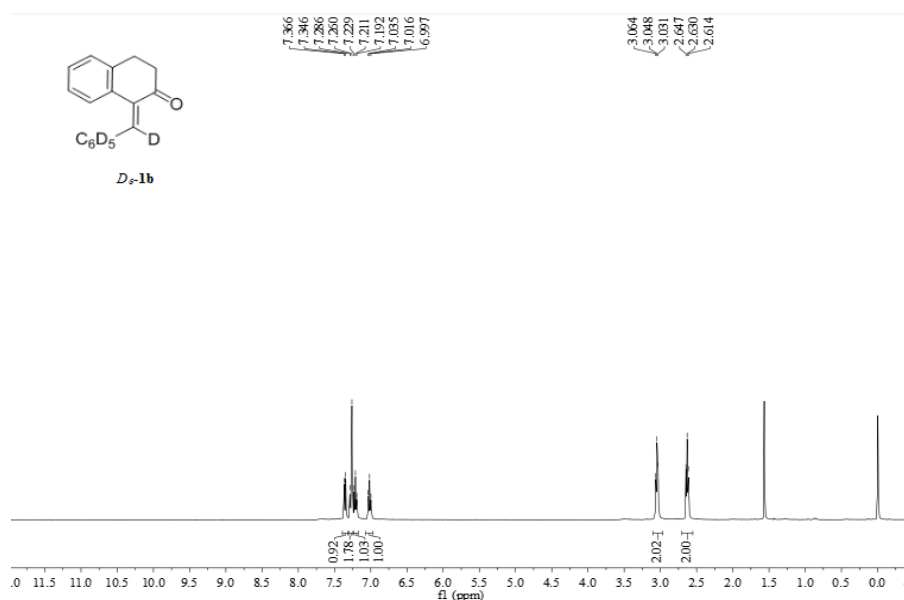

**The reaction of  $D_6$ -1b with 2a:** A suspension of  $[\text{Cp}^*\text{Rh}(\text{CH}_3\text{CN})_3](\text{SbF}_6)_2$  (16.6 mg, 10 mol %),  $D_6$ -1b (48.0 mg, 0.2 mmol), 2a (42.7 mg, 0.24 mmol),  $\text{Cu}(\text{OAc})_2 \cdot \text{H}_2\text{O}$  (79.2 mg, 0.4 mmol) and  $\text{Cu}_2\text{O}$  (14.1 mg, 0.1 mmol) in DCM (1 mL) was sealed with a teflon-coated screw cap and the reaction was stirred at 100 °C for 24 h. At the end of the reaction, the mixture was filtered through a celite pad and washed with DCM. The filtrate was concentrated under reduced pressure and the

residue was purified by flash chromatography on silica gel column (PE/DCM = 10:1, v/v) to provide 45 mg of *D<sub>m</sub>*-**3b** as a white solid. The <sup>1</sup>H-NMR analysis of the product *D<sub>m</sub>*-**3b** showed no benzylic deuterium, indicating that this reaction underwent a vinylic C(sp<sup>2</sup>)-H bond cleavage process.

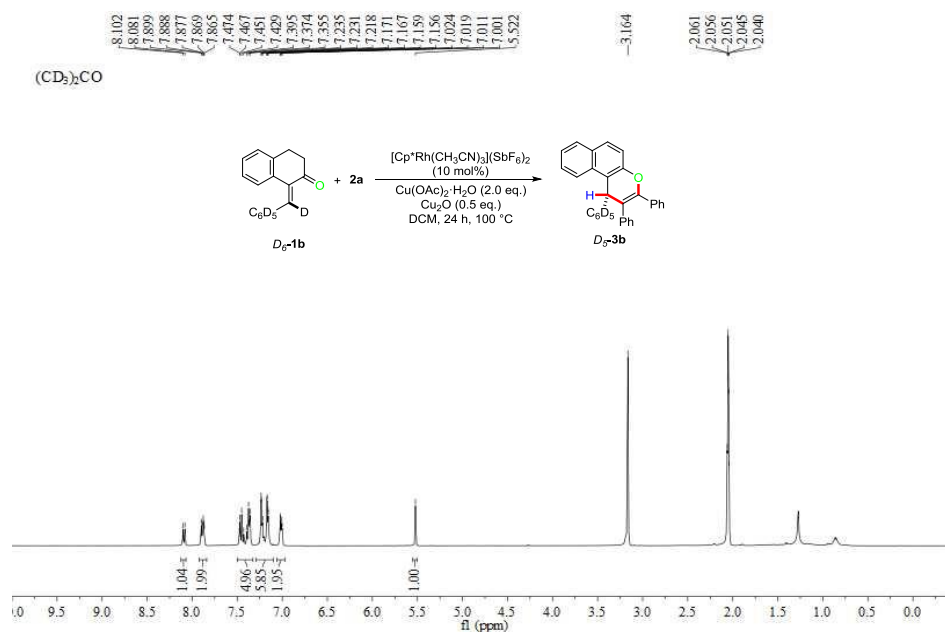

## 2. H/D exchange experiment

H/D exchange in the reaction of **1b** with D<sub>2</sub>O (10 equiv.) without **2a**: A solution of [Cp\*Rh(CH<sub>3</sub>CN)<sub>3</sub>](SbF<sub>6</sub>)<sub>2</sub> (16.6 mg, 10 mol %), **1b** (46.8 mg, 0.2 mmol), Cu(OAc)<sub>2</sub>·H<sub>2</sub>O (79.2 mg, 0.4 mmol), Cu<sub>2</sub>O (14.1 mg, 0.1 mmol) and D<sub>2</sub>O (2 mmol, 40 μL) in DCM was sealed with a teflon-coated screw cap and the reaction was stirred at 100 °C for 24 h. At the end of the reaction, the mixture was filtered through a celite pad and washed with DCM. The filtrate was concentrated under reduced pressure and the residue was purified by flash chromatography on silica gel column (PE/EA) to provide recovered **1b** (41.4 mg, 88%) as an off-white solid. The D-incorporation in recovered **1b** was estimated by <sup>1</sup>H NMR spectroscopy and 5% of vinylic-H was deuterated, which indicated that the vinylic C-H bond cleavage is irreversible.

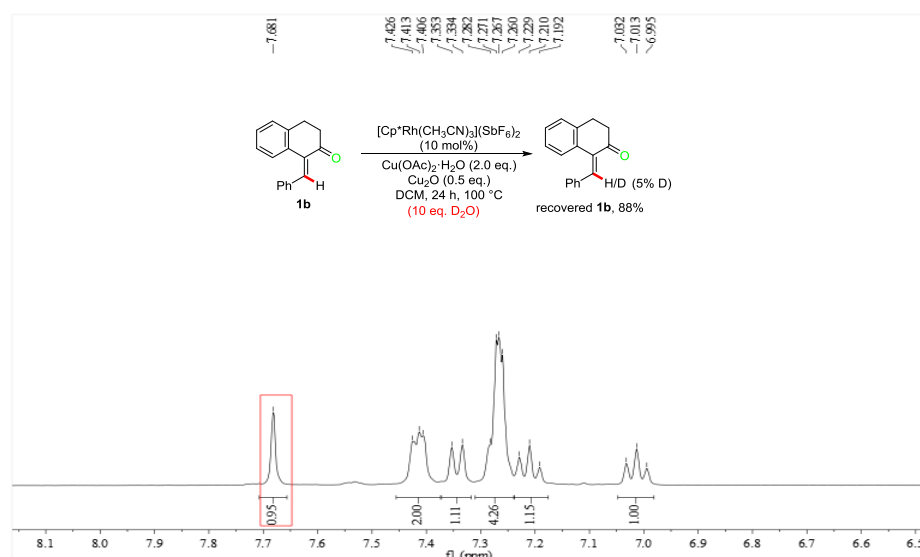

### 3. KIE using *D*<sub>6</sub>-**1b** and **1b** as substrates

A suspension of [Cp\*Rh(CH<sub>3</sub>CN)<sub>3</sub>](SbF<sub>6</sub>)<sub>2</sub> (16.6 mg, 10 mol %), **1b** (23.4 mg, 0.1 mmol), *D*<sub>6</sub>-**1b** (24.0 mg, 0.1 mmol), **2a** (42.7 mg, 0.24 mmol), Cu(OAc)<sub>2</sub>·H<sub>2</sub>O (79.2 mg, 0.4 mmol) and Cu<sub>2</sub>O (14.1 mg, 0.1 mmol) in DCM (1 mL) was sealed with a teflon-coated screw cap and the reaction was stirred at 100 °C for 3 h. At the end of the reaction, the mixture was filtered through a celite pad and washed with DCM. The filtrate was concentrated under reduced pressure and the residue was purified by flash chromatography on silica gel column (PE/DCM = 10:1, v/v) to provide a mixture of **3b** and *D*<sub>5</sub>-**3b** in 18% yield as a white solid. The ratio of **3b** and *D*<sub>5</sub>-**3b** was determined by <sup>1</sup>H NMR spectroscopy to give intermolecular kinetic isotopic effect (*KIE*)  $k_H/k_D = 1.5$ . This result revealed that the vinylic C–H activation is not involved in the rate-determining step.

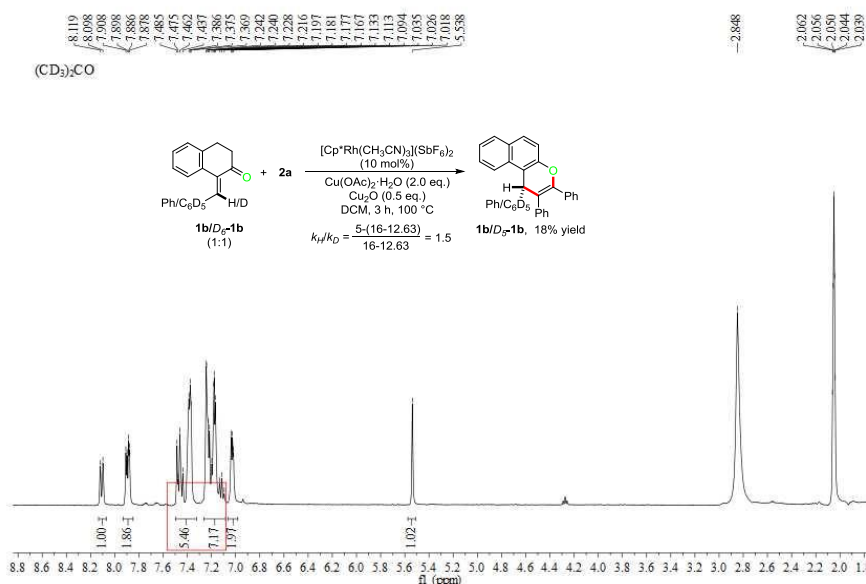

### 4. Control experiments to verify the reaction intermediate

**Synthesis of pyrylium tetrafluoroborate 4:** According to a reported procedure<sup>4</sup>, chalcone (416 mg, 2 mmol) was heated to its melting point on a steam-bath.  $\beta$ -Tetralone (2.34 g, 16 mmol) was added followed by the addition of BF<sub>3</sub>·Et<sub>2</sub>O (2 mL) with stirring. The mixture was heated to 100 °C and stirred continued for 12 h. After cooled down to room temperature, an excess amount of Et<sub>2</sub>O was added to give the orange pyrylium tetrafluoroborate **4** (369 mg, 55%. *Note: 4 slowly decomposes when stored under ambient conditions.*).

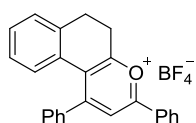

**1,3-Diphenyl-5,6-dihydrobenzo[f]chromen-4-ium tetrafluoroborate (4):** <sup>1</sup>H NMR (400 MHz, CDCl<sub>3</sub>):  $\delta$  = 3.30 (t,  $J$  = 7.2 Hz, 2H), 3.45 (t,  $J$  = 7.2 Hz, 2H), 6.85 (d,  $J$  = 8.0 Hz, 1H), 6.92 (t,  $J$  =

7.2 Hz, 1H), 7.24-7.31 (m, 2H), 7.45-7.63 (m, 8H), 8.08 (s, 1H), 8.17 (d,  $J = 7.6$  Hz, 2H) ppm.  $^{13}\text{C}$  NMR (100 MHz,  $\text{CDCl}_3$ ):  $\delta = 26.8, 29.7, 121.1, 126.8, 127.3, 128.3, 128.6, 128.8, 128.87, 128.9, 129.0, 129.8, 130.0, 130.6, 132.5, 135.1, 135.7, 137.2, 164.8, 169.2, 180.0$  ppm.  $^{19}\text{F}$  NMR (376 MHz,  $\text{CDCl}_3$ ):  $\delta = -153.1$  ppm. HRMS (ESI $^+$ ): calcd for  $\text{C}_{25}\text{H}_{19}\text{O}$   $[\text{M}-\text{BF}_4]^+$  335.1430, found 335.1423.

### Conversion of pyrylium tetrafluoroborate **4** into 1,3-diphenyl-1*H*-benzo[*f*]chromene **5**:

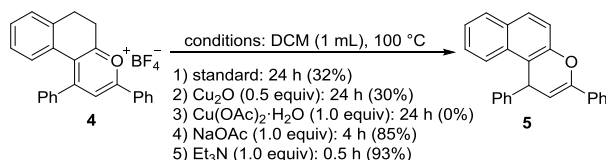

A Schlenk tube containing pyrylium tetrafluoroborate **4** (0.2 mmol), 1) standard conditions:  $[\text{Cp}^*\text{Rh}(\text{CH}_3\text{CN})_3](\text{SbF}_6)_2$  (16.6 mg, 10 mol %),  $\text{Cu}(\text{OAc})_2 \cdot \text{H}_2\text{O}$  (79.2 mg, 0.4 mmol) and  $\text{Cu}_2\text{O}$  (14.1 mg, 0.1 mmol), or a base [2)  $\text{Cu}_2\text{O}$  (14.1 mg, 0.1 mmol); 3)  $\text{Cu}(\text{OAc})_2 \cdot \text{H}_2\text{O}$  (39.6 mg, 0.2 mmol); 4)  $\text{NaOAc}$  (8.2 mg, 0.2 mmol); and 5)  $\text{Et}_3\text{N}$  (28  $\mu\text{L}$ , 0.2 mmol), respectively], and DCM (1 mL) was sealed with a teflon-coated screw cap and the reaction was stirred at 100 °C for the indicated time (standard conditions,  $\text{Cu}_2\text{O}$  or  $\text{Cu}(\text{OAc})_2 \cdot \text{H}_2\text{O}$ : 24 h;  $\text{NaOAc}$ : 4 h; and  $\text{Et}_3\text{N}$ : 0.5 h, respectively). After cooled down to room temperature, the mixture was diluted with DCM, filtered through a celite pad and washed with DCM. The filtrate was then concentrated under reduced pressure and the residue was purified by flash chromatography on silica gel column (PE/DCM = 10/1, v/v) to afford **5** as a white solid in the indicated yield (standard conditions: 32%;  $\text{Cu}_2\text{O}$ : 30%;  $\text{Cu}(\text{OAc})_2 \cdot \text{H}_2\text{O}$ : 0%;  $\text{NaOAc}$ : 85%; and  $\text{Et}_3\text{N}$ : 93 %, respectively).

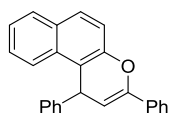

**1,3-Diphenyl-1*H*-benzo[*f*]chromene (**5**):**  $^1\text{H}$  NMR (400 MHz,  $\text{CDCl}_3$ ):  $\delta = 5.37$  (d,  $J = 5.6$  Hz, 1H), 5.81 (t,  $J = 5.2$  Hz, 2H), 7.15 (t,  $J = 6.4$  Hz, 1H), 7.24-7.43 (m, 10H), 7.73-7.75 (m, 3H), 7.80 (d,  $J = 8.4$  Hz, 2H) ppm.  $^{13}\text{C}$  NMR (100 MHz,  $\text{CDCl}_3$ ):  $\delta = 39.3, 102.3, 114.4, 118.2, 123.8, 124.2, 124.8, 126.5, 126.7, 127.8, 129.1, 131.2, 131.9, 134.1, 146.5, 146.8, 149.7$  ppm.

### 5. The reaction of **1b** with **2a** in the presence of $\text{D}_2\text{O}$ :

A suspension of  $[\text{Cp}^*\text{Rh}(\text{CH}_3\text{CN})_3](\text{SbF}_6)_2$  (16.6 mg, 10 mol %), **1b** (47.2 mg, 0.2 mmol), **2a** (42.7 mg, 0.24 mmol),  $\text{Cu}(\text{OAc})_2 \cdot \text{H}_2\text{O}$  (79.2 mg, 0.4 mmol),  $\text{Cu}_2\text{O}$  (14.1 mg, 0.1 mmol) and  $\text{D}_2\text{O}$  (2 mmol, 40  $\mu\text{L}$ ) in DCM (1 mL) was sealed with a teflon-coated screw cap and the reaction was stirred at 100 °C for 24 h. At the end of the reaction, the mixture was filtered through a celite pad and washed with DCM. The filtrate was concentrated under reduced pressure and the residue was purified by flash



chromatography on silica gel column (PE/DCM = 10:1, v/v) to provide 25 mg of **D<sub>n</sub>-3b** as a white solid. The <sup>1</sup>H NMR analysis of the product **D<sub>n</sub>-3b** showed no benzylic deuterium, indicating that the formation of the benzylic C–H bond might not involve a protonation process.

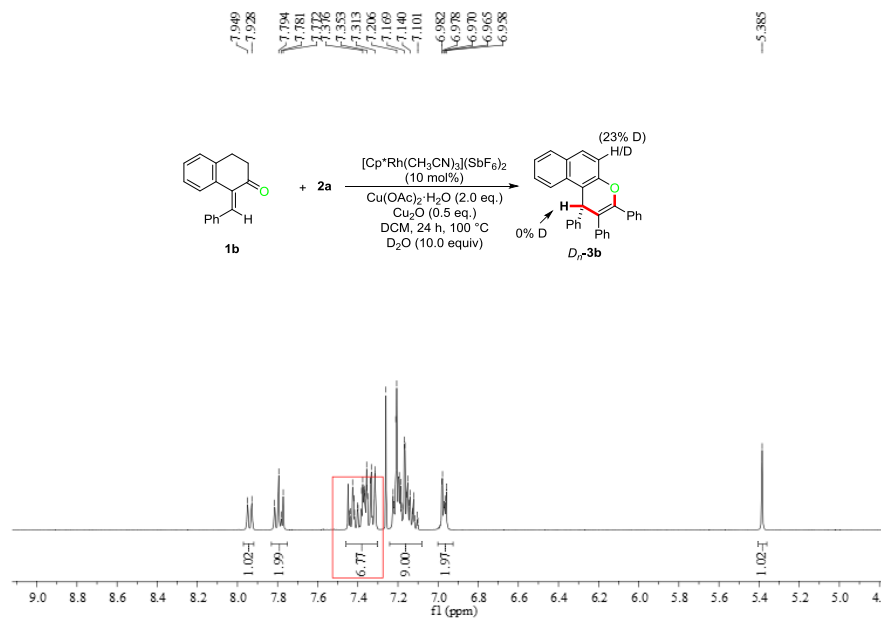

## 6. The benzylic H scrambling reaction of **3b** with D<sub>2</sub>O

A suspension of [Cp\*Rh(CH<sub>3</sub>CN)<sub>3</sub>](SbF<sub>6</sub>)<sub>2</sub> (16.6 mg, 10 mol %), **3b** (82.0 mg, 0.2 mmol) Cu(OAc)<sub>2</sub>·H<sub>2</sub>O (79.2 mg, 0.4 mmol), Cu<sub>2</sub>O (14.1 mg, 0.1 mmol) and D<sub>2</sub>O (2 mmol, 40 μL) in DCM (1 mL) was sealed with a teflon-coated screw cap and the reaction was stirred at 100 °C for 24 h. At the end of the reaction, the mixture was filtered through a celite pad and washed with DCM. The filtrate was concentrated under reduced pressure and the residue was purified by flash chromatography on silica gel column (PE/DCM = 5:1, v/v) to provide 80 mg of recovered **3b** as a white solid. The <sup>1</sup>H NMR analysis of recovered **3b** showed no benzylic deuterium, indicating that the benzylic H in **3b** could not undergo H/D exchange with D<sub>2</sub>O.

## 7. The reaction of C3-D<sub>2</sub>-**1b** with **2a**

**Synthesis of C3-D<sub>2</sub>-1b:**<sup>6</sup> To a solution of 10 mol % of pyrrolidine (7.1 mg, 0.1 mmol) in 1.5 mL of D<sub>2</sub>O with 1.5 mL anhydrous dioxane as cosolvent was added **1b** (234 mg, 1 mmol). The reaction mixture was stirred at 60 °C for 12 h. After cooled down to room temperature, water (10 mL) was added and the mixture was extracted with EA (2 × 10 mL). The organic layer was washed with water (5 mL) and brine (5 mL), dried over anhydrous MgSO<sub>4</sub>, and filtered. The filtrate was concentrated under reduced pressure to afford C3-D<sub>2</sub>-**1b** in 90% yield (>99% D). <sup>1</sup>H NMR (400 MHz, CDCl<sub>3</sub>): δ = 3.02 (d, *J* = 6.4 Hz, 2H), 7.01 (t, *J* = 7.6 Hz, 1H), 7.19-7.28 (m, 5H), 7.34 (d, *J* = 8.0 Hz, 1H), 7.40-7.43 (m, 2H), 7.68 (s, 1H) ppm.

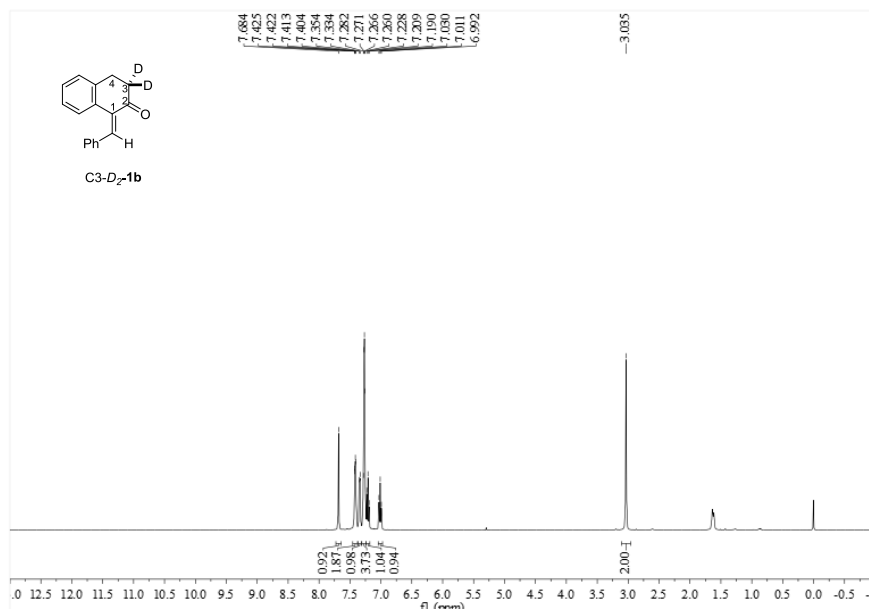

**The reaction of C3-*D*<sub>2</sub>-1b with 2a under the optimal conditions :** A suspension of [Cp\*Rh(CH<sub>3</sub>CN)<sub>3</sub>](SbF<sub>6</sub>)<sub>2</sub> (16.6 mg, 10 mol %), C3-*D*<sub>2</sub>-1b (47.2 mg, 0.2 mmol), **2a** (42.7 mg, 0.24 mmol), Cu(OAc)<sub>2</sub>·H<sub>2</sub>O (79.2 mg, 0.4 mmol) and Cu<sub>2</sub>O (14.1 mg, 0.1 mmol) in DCM (1 mL) was sealed with a teflon-coated screw cap and the reaction was stirred at 100 °C for 24 h. At the end of the reaction, the mixture was filtered through a celite pad and washed with DCM. The filtrate was concentrated under reduced pressure and the residue was purified by flash chromatography on silica gel column (PE/DCM = 10:1, v/v) to provide 40 mg of *D<sub>x</sub>*-**3b** as a white solid. The <sup>1</sup>H NMR analysis of the product *D<sub>x</sub>*-**3b** showed no benzylic deuterium, indicating that the benzylic H did not come from that of C3-position.

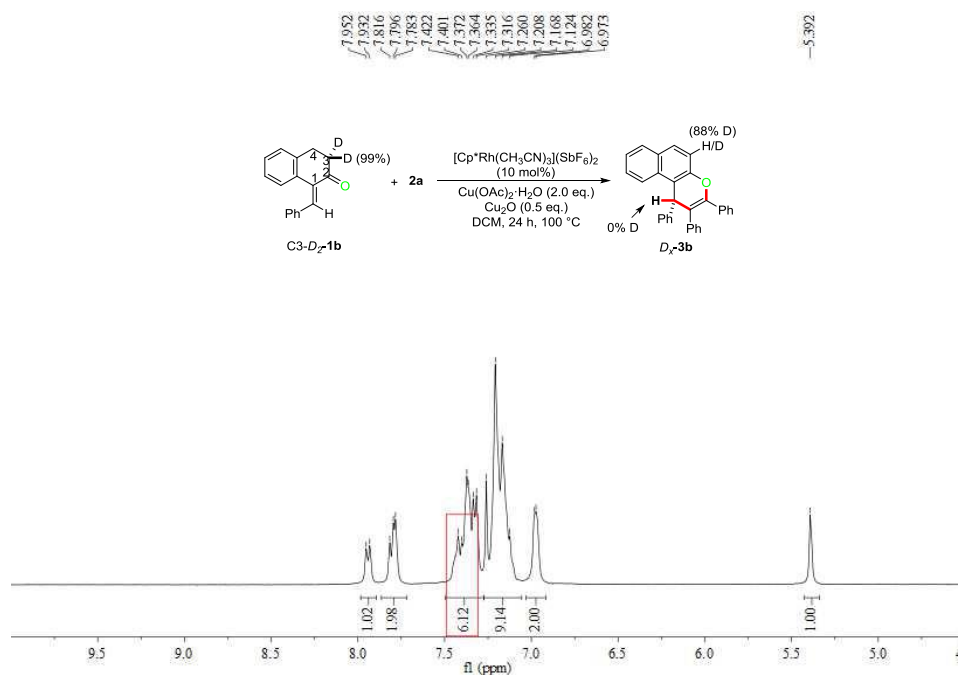

## 8. The reaction of C3,4-*D*<sub>4</sub>-1b with 2a

### Synthesis of C3,4-*D*<sub>4</sub>-1b:

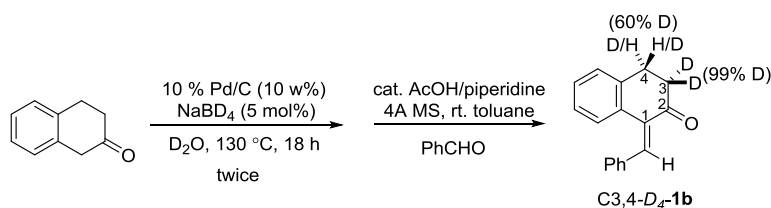

A suspension of 10 % Pd/C (29.2 mg, 10 wt% of the ketone), NaBD<sub>4</sub> (4.2 mg, 5 mol %), 3,4-dihydronaphthalen-2(1*H*)-one (292 mg, 2 mmol) in D<sub>2</sub>O (3 mL) was sealed with a teflon-coated screw cap and the reaction was stirred at 130 °C for 18 h in N<sub>2</sub>. After cooled down to room temperature, water (10 mL) was added and the mixture was extracted with EA (2 × 10 mL). The organic layer was dried over anhydrous MgSO<sub>4</sub>, and filtered and the filtrate was concentrated under reduced pressure to afford 155 mg of *D*<sub>n</sub>-3,4-dihydronaphthalen-2(1*H*)-one which was used for the next step without further purification (Note: The above H/D exchange experiment of 3,4-dihydronaphthalen-2(1*H*)-one with D<sub>2</sub>O was conducted for twice.).<sup>7</sup> Following the general procedure by using *D*<sub>n</sub>-3,4-dihydronaphthalen-2(1*H*)-one with benzaldehyde to provide C3,4-*D*<sub>4</sub>-1b as an off-white solid in 72% yield, (C4-position, 60% D; C3-position, >99% D). <sup>1</sup>H NMR (400 MHz, CDCl<sub>3</sub>): δ = 3.02 (d, *J* = 6.4 Hz, 0.8H), 7.01 (t, *J* = 7.2 Hz, 1H), 7.19-7.27 (m, 5H), 7.34 (d, *J* = 7.6 Hz, 1H), 7.41-7.42 (m, 2H), 7.68 (s, 1H) ppm.

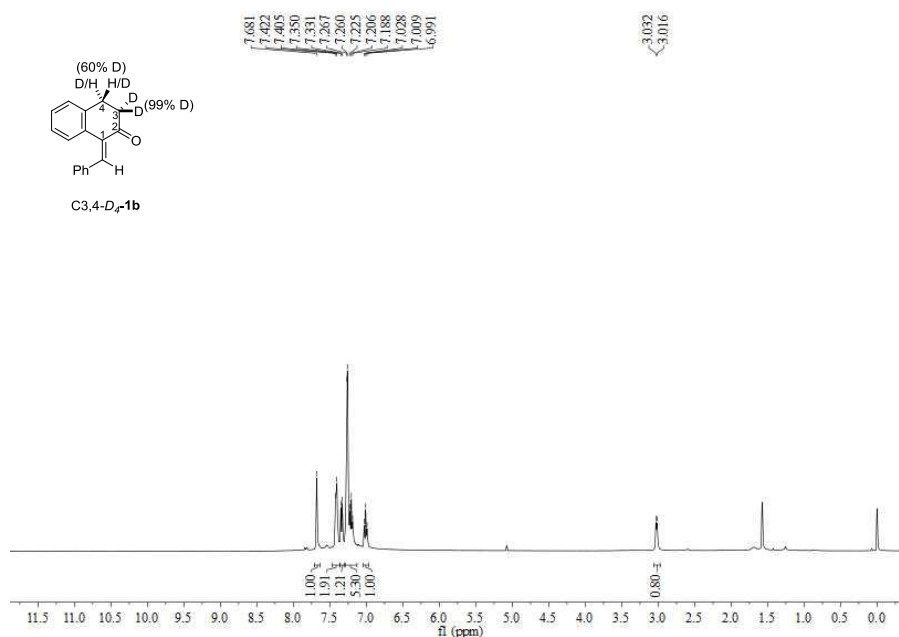

**The reaction of C3,4-*D*<sub>4</sub>-1b with 2a under the optimal conditions :** A suspension of [Cp\*Rh(CH<sub>3</sub>CN)<sub>3</sub>](SbF<sub>6</sub>)<sub>2</sub> (16.6 mg, 10 mol %), C3,4-*D*<sub>4</sub>-1b (48 mg, 0.2 mmol), 2a (42.7 mg, 0.24 mmol), Cu(OAc)<sub>2</sub>·H<sub>2</sub>O (79.2 mg, 0.4 mmol) and Cu<sub>2</sub>O (14.1 mg, 0.1 mmol) in DCM (1 mL) was

sealed with a teflon-coated screw cap and the reaction was stirred at 100 °C for 24 h. At the end of the reaction, the mixture was filtered through a celite pad and washed with DCM. The filtrate was concentrated under reduced pressure and the residue was purified by flash chromatography on silica gel column (PE/DCM = 10:1, v/v) to provide 36 mg of **D<sub>y</sub>-3b** as a white solid. The <sup>1</sup>H NMR analysis of the product **D<sub>y</sub>-3b** showed 46% benzylic deuterium, indicating that it was the C4-H in **1b** transferred to the benzylic position in **3b**.

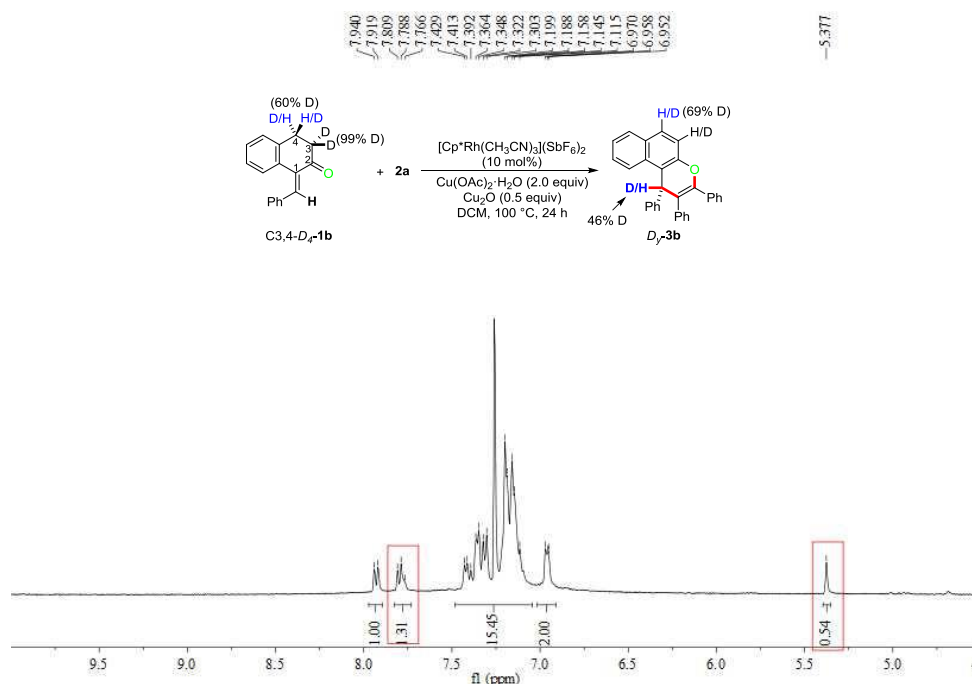

## V. Conversion of **3** into Cationic *O*-Containing PHAs

### 1. Oxidation of **3** into pyrylium salt **6** by Br<sub>2</sub><sup>8</sup>

A suspension of **3** (0.2 mmol) in AcOH (2 mL) stirred at 100 °C was added a solution of Br<sub>2</sub> (0.24 mmol) in AcOH (1 mL) dropwise. The mixture was stirred continuously at the same temperature for 1h. At the end of the reaction, the excess Br<sub>2</sub> was blown off by N<sub>2</sub> and a large amount of Et<sub>2</sub>O was added into the resulted mixture. An orange solid precipitated out, which was collected and dried under reduced pressure to provide **6**.

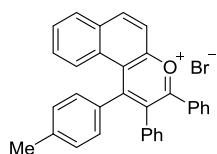

**2,3-Diphenyl-1-(*p*-tolyl)benzo[*f*]chromen-4-ium bromide (**6a**):** 97% yield, an orange solid. <sup>1</sup>H NMR (400 MHz, CDCl<sub>3</sub>): δ = 2.38 (s, 3H), 7.13-7.28 (m, 9H), 7.36-7.45 (m, 4H), 7.52 (t, *J* = 7.6 Hz, 1H), 7.70 (t, *J* = 8.0 Hz, 1H), 7.75 (d, *J* = 7.6 Hz, 2H), 8.09 (d, *J* = 7.6 Hz, 1H), 8.25 (d, *J* = 9.2 Hz,

1H), 8.64 (d,  $J = 9.2$  Hz, 1H) ppm.  $^{13}\text{C}$  NMR (100 MHz,  $\text{CDCl}_3$ ): 21.7, 118.1, 123.8, 128.0, 128.3, 128.8, 128.9, 129.09, 129.12, 129.8, 130.1, 130.3, 130.4, 131.0, 131.4, 131.7, 131.9, 133.2, 133.5, 133.8, 134.8, 140.7, 144.6, 161.0, 169.0, 169.3 ppm. HRMS ( $\text{ESI}^+$ ): calcd for  $\text{C}_{32}\text{H}_{23}\text{O}$   $[\text{M}-\text{Br}]^+$  423.1743, found 423.1745.

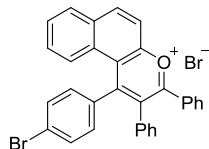

**1-(4-Bromophenyl)-2,3-diphenylbenzo[f]chromen-4-ium bromide (6e):** 95% yield, an orange solid.  $^1\text{H}$  NMR (400 MHz,  $\text{CD}_3\text{CN}$ ):  $\delta = 7.14$ -7.19 (m, 4H), 7.30 (d,  $J = 7.2$  Hz, 2H), 7.37 (t,  $J = 7.2$  Hz, 1H), 7.43-7.50 (m, 3H), 7.53-7.58 (m, 1H), 7.62-7.66 (m, 3H), 7.71-7.73 (m, 2H), 7.85 (t,  $J = 8.0$  Hz, 1H), 8.29 (d,  $J = 7.2$  Hz, 1H), 8.35 (d,  $J = 10.6$  Hz, 1H), 8.86 (d,  $J = 9.2$  Hz, 1H) ppm.  $^{13}\text{C}$  NMR (100 MHz,  $\text{CD}_3\text{CN}$ ):  $\delta = 118.5$ , 124.0, 125.1, 128.4, 129.0, 129.7, 130.0, 130.1, 130.4, 131.0, 131.2, 131.3, 131.9, 132.2, 132.3, 132.8, 133.6, 134.0, 135.0, 135.8, 136.6, 145.8, 161.8, 168.0, 170.1 ppm. HRMS ( $\text{ESI}^+$ ): calcd for  $\text{C}_{31}\text{H}_{20}\text{BrO}$   $[\text{M}-\text{Br}]^+$  487.0692, found 487.0691.

## 2. Photooxidation of 6 into 7<sup>8</sup>

A stirring solution of pyrylium salt **6** (0.05 mmol) and 50 w%  $\text{HBF}_4$  (0.05 mmol) in AcOH (50 mL) was irradiated at 254 nm wavelength in air for 24 hours at room temperature and an orange solid precipitated out gradually. At the end of the reaction, the solid was collected and dried under reduced pressure to provide the  $\pi$ -extended pyrylium salt **7**.

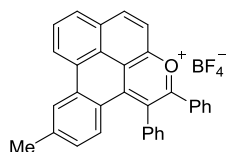

**10-Methyl-1,2-diphenylphenanthro[9,10,1-def]chromen-3-ium tetrafluoroborate (7a):** 24.9 mg, 98% yield, an orange solid.  $^1\text{H}$  NMR (400 MHz,  $(\text{CD}_3)_2\text{SO}$ ):  $\delta = 2.66$  (s, 3H), 7.37 (d,  $J = 8.8$  Hz, 1H), 7.47-7.61 (m, 10H), 7.71 (d,  $J = 8.8$  Hz, 1H), 8.60 (t,  $J = 8.0$  Hz, 1H), 8.80 (d,  $J = 9.2$  Hz, 1H), 9.04 (d,  $J = 7.6$  Hz, 1H), 9.25 (s, 1H), 9.41 (d,  $J = 9.2$  Hz, 1H), 9.77 (d,  $J = 8.0$  Hz, 1H) ppm.  $^{13}\text{C}$  NMR (100 MHz,  $(\text{CD}_3)_2\text{SO}$ ):  $\delta = 21.9$ , 116.5, 118.9, 119.2, 123.9, 125.4, 128.0, 128.4, 128.6, 128.9, 129.1, 129.6, 129.8, 130.1, 130.4, 130.6, 130.7, 131.4, 131.8, 133.9, 135.6, 136.8, 143.8, 147.1, 148.4, 159.8, 165.9 ppm.  $^{19}\text{F}$  NMR (376 MHz,  $(\text{CD}_3)_2\text{SO}$ ):  $\delta = -148.2$  ppm. HRMS ( $\text{ESI}^+$ ): calcd for  $\text{C}_{32}\text{H}_{21}\text{O}$   $[\text{M}-\text{BF}_4]^+$  421.1587, found 421.1565.

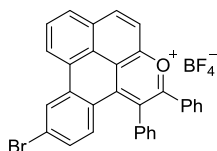

**10-Bromo-1,2-diphenylphenanthro[9,10,1-*def*]chromen-3-ium tetrafluoroborate (7e):** 27.7 mg, 97% yield, an orange solid.  $^1\text{H}$  NMR (400 MHz,  $\text{CD}_3\text{CN}$ ):  $\delta$  = 7.44-7.67 (m, 11H), 7.73 (d,  $J$  = 9.2 Hz, 1H), 8.47 (t,  $J$  = 8.0 Hz, 1H), 8.57 (d,  $J$  = 9.2 Hz, 1H), 8.89 (d,  $J$  = 7.6 Hz, 1H), 8.24 (d,  $J$  = 9.2 Hz, 1H), 9.27 (s, 1H), 9.43 (d,  $J$  = 8.0 Hz, 1H) ppm.  $^{13}\text{C}$  NMR (100 MHz,  $\text{CD}_3\text{CN}$ ):  $\delta$  = 119.7, 120.7, 126.2, 129.0, 129.1, 129.5, 129.7, 130.1, 130.4, 131.0, 131.3, 131.5, 131.55, 131.63, 131.7, 132.1, 132.6, 132.8, 133.6, 135.5, 136.2, 139.4, 145.4, 150.0, 161.3, 167.8 ppm.  $^{19}\text{F}$  NMR (376 MHz,  $\text{CD}_3\text{CN}$ ):  $\delta$  = -152.7 ppm. HRMS (ESI $^+$ ): calcd for  $\text{C}_{31}\text{H}_{18}\text{BrO}$   $[\text{M}-\text{BF}_4]^+$  485.0536, found 485.0539.

## VI. References

1. Kang, J. W.; Moseley, K.; Maitlis, P. M. *J. Am. Chem. Soc.* **1969**, *91*, 5970.
2. (a) Dimmock, J. R.; Padmanilayam, M. P.; Zello, G. A.; Quail, J. W.; Oloo, E. O.; Prisciak, J. S.; Kraatz, H.-B.; Cherkasov, A.; Lee, J. S.; Allen, T. M.; Santos, C. L.; Manavathu, E. K.; De Clercq, E.; Balzarini, J.; Stables, J. P. *Eur. J. Med. Chem.* **2002**, *37*, 813; (b) Jha, A.; Zhao, J.; Cameron, T. S.; Clercq, E. D.; Balzarini, J.; Manavathu, E.K.; Stables, J. P. *Lett. Drug Des. Discov.* **2006**, *3*, 304.
3. a) K. Park, G. Bae, J. Moon, J. Choe, K. H. Song, S. Lee, *J. Org. Chem.* **2010**, *75*, 6244; b) X. Tang, S. Woodward, N. Krause, *Eur. J. Org. Chem.* **2009**, 2836.
4. Katritzky, A. R.; Thind, S. S. *J. Chem. Soc., Perkin Trans. 1* **1980**, 1895.
5. Sandaroos, R.; Damavandi, S. *Res. Chem. Intermed.* **2013**, *39*, 4167
6. Zhan, M.; Zhang, T.; Huang, H.; Xie, Y.; Chen, Y. *J. Label Compd. Radiopharm.* **2014**, *57*, 533.
7. Derdau, V.; Atzrodt, J. *Synlett* **2006**, *12*, 1918.
8. Wu, D.; Pisula, W.; Haberecht, M. C.; Feng, X.; Müllen, K. *Org. Lett.* **2009**, *11*, 5686.

## VII. Copies of $^1\text{H}$ , $^{13}\text{C}$ and $^{19}\text{F}$ NMR Spectra

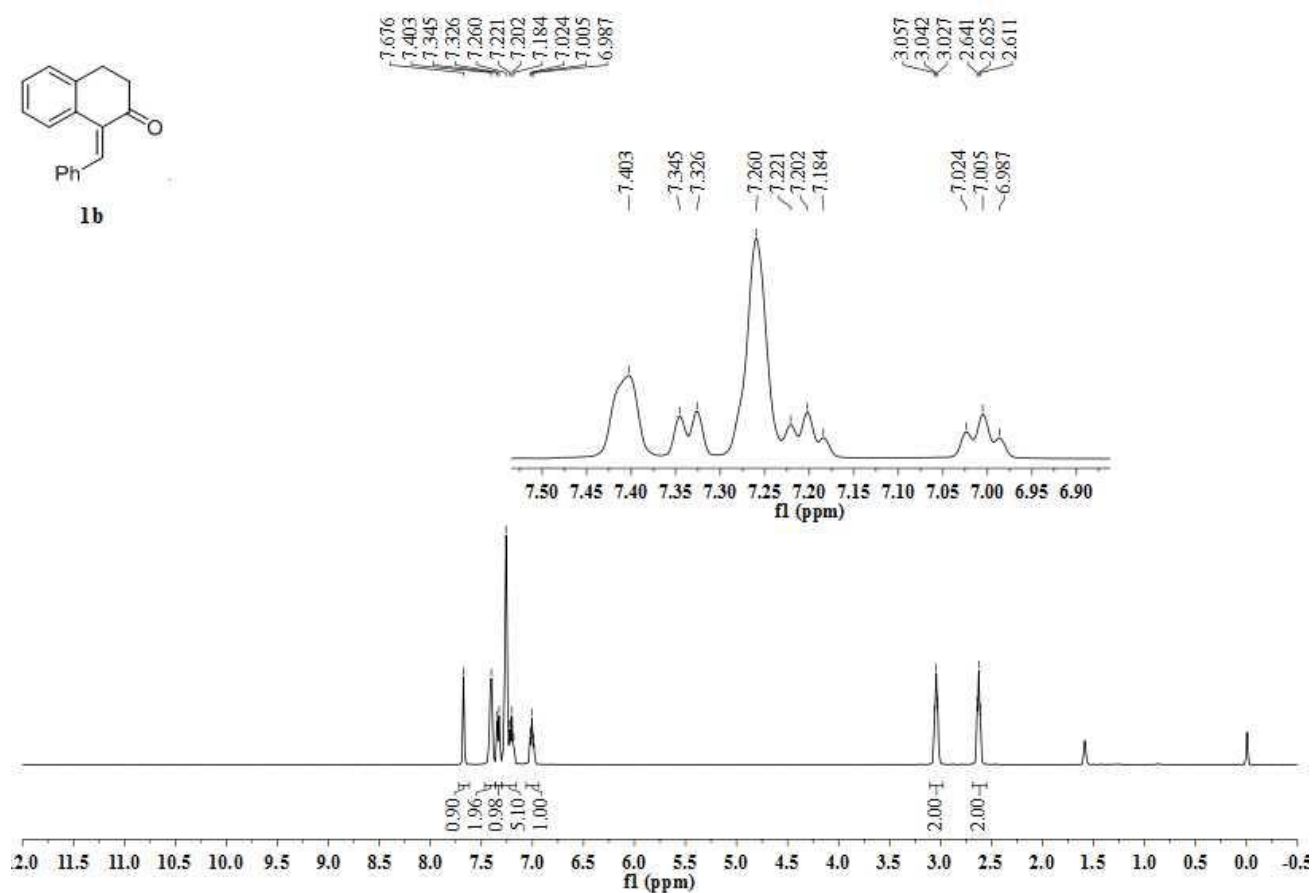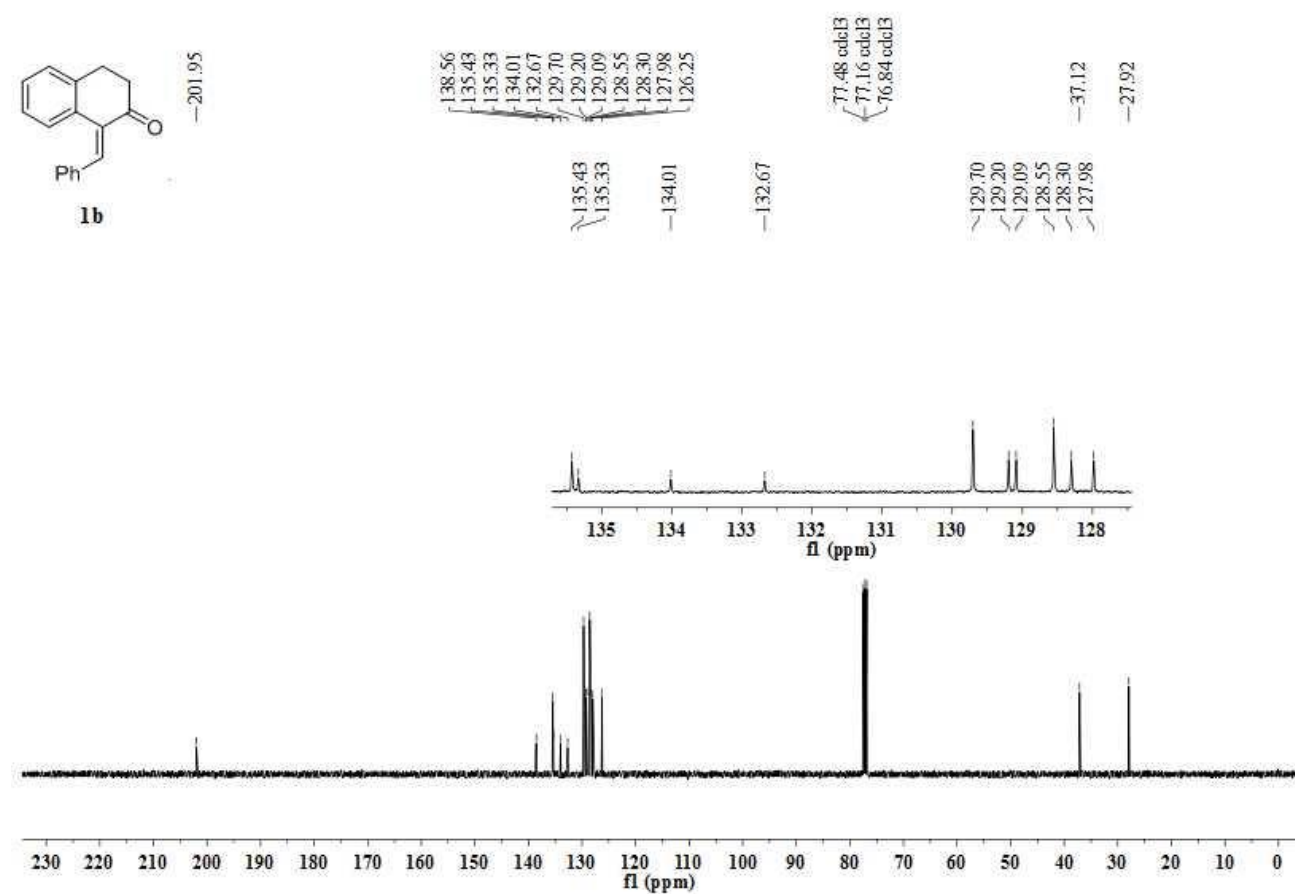

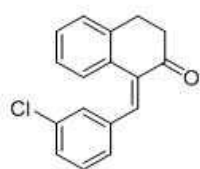

1i

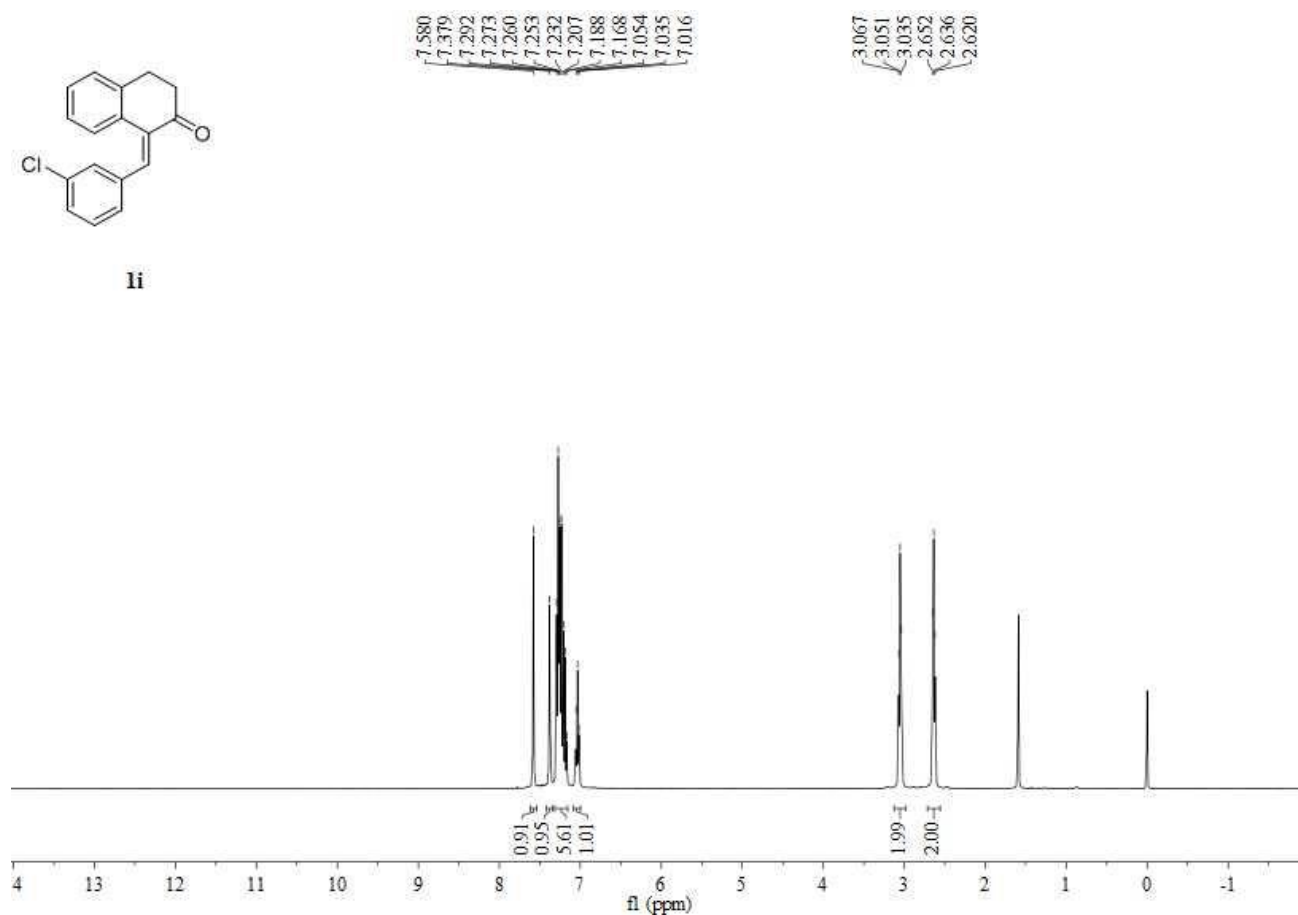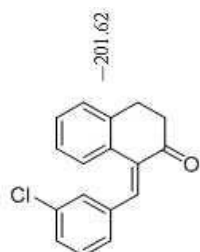

1i

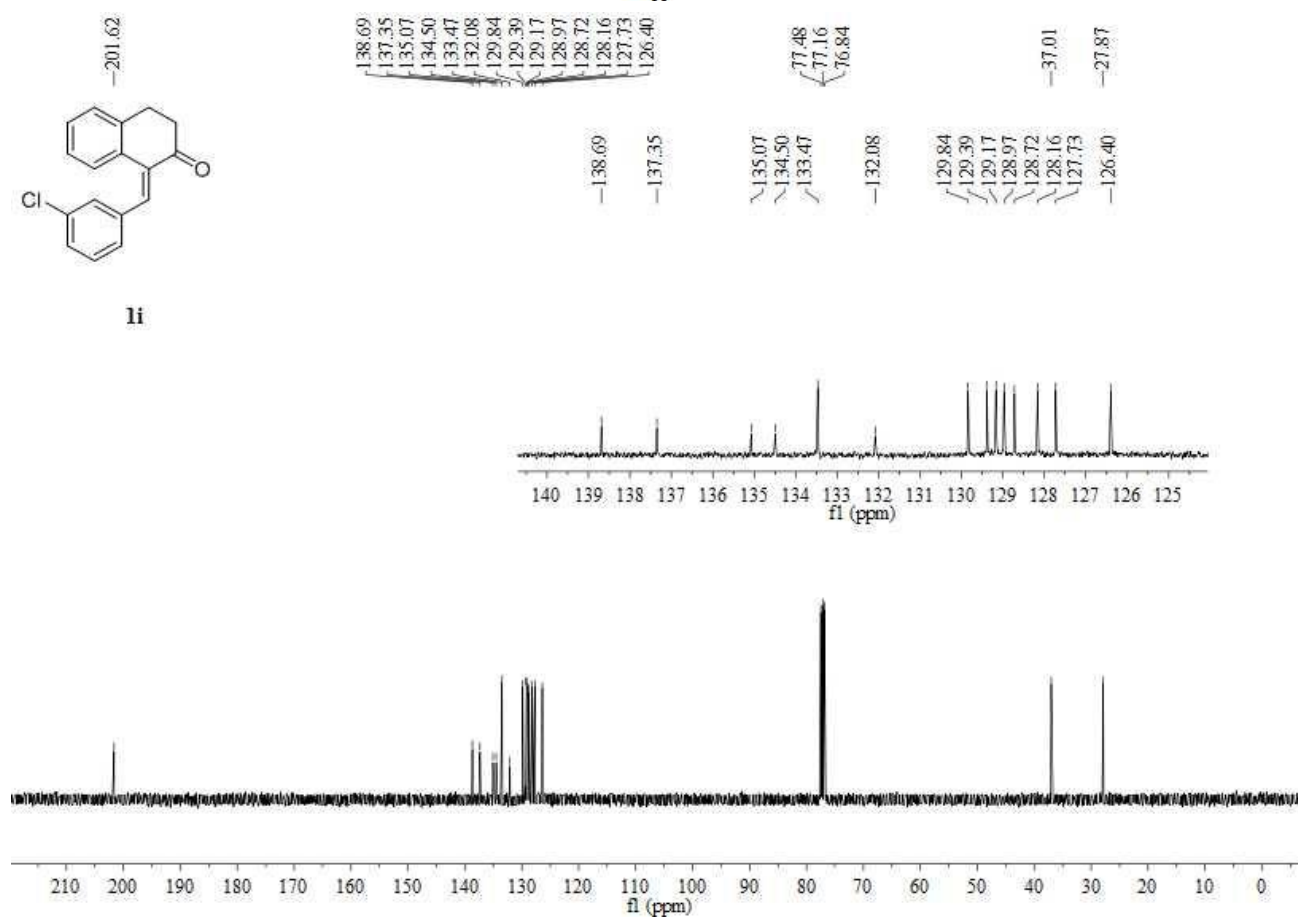



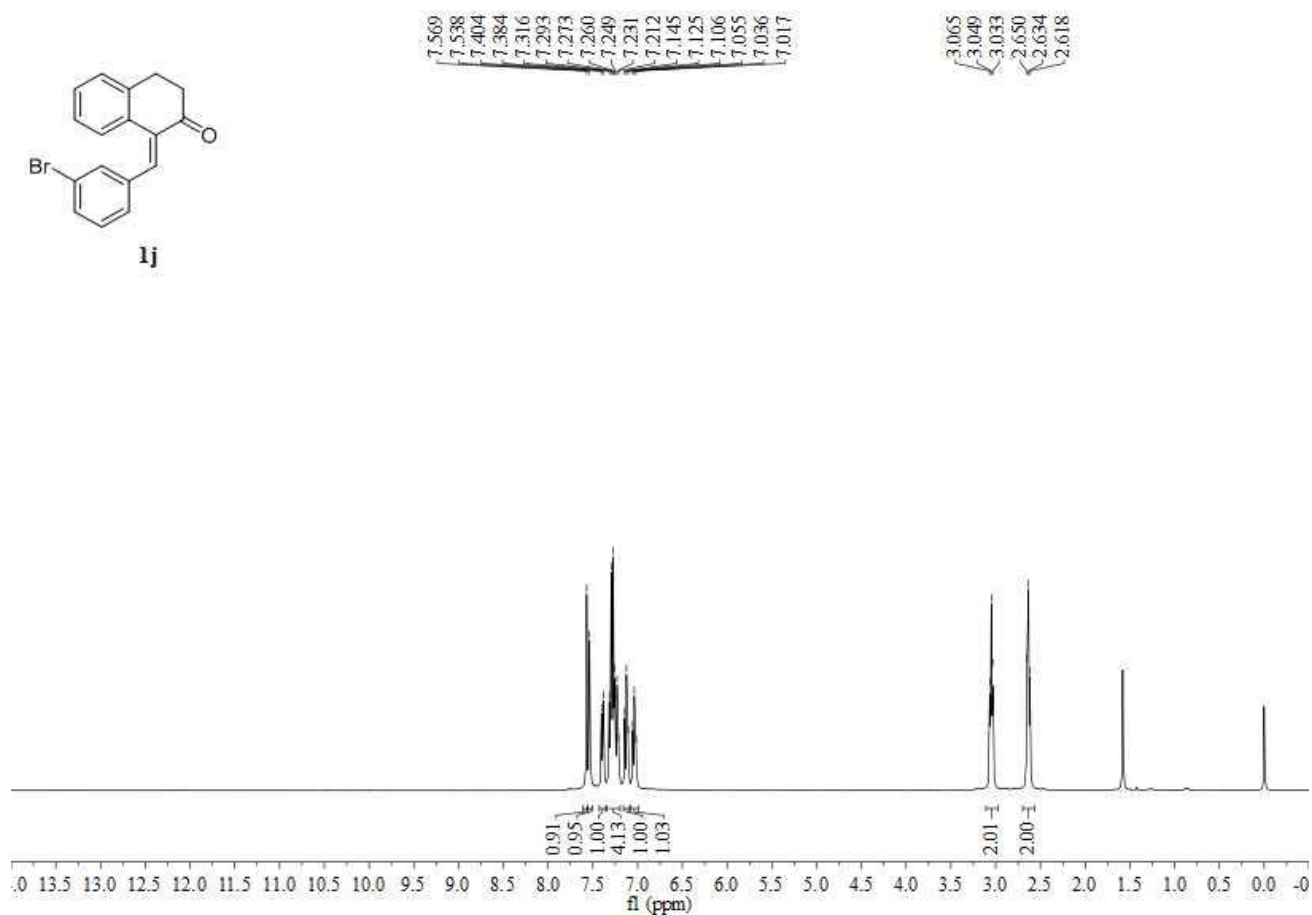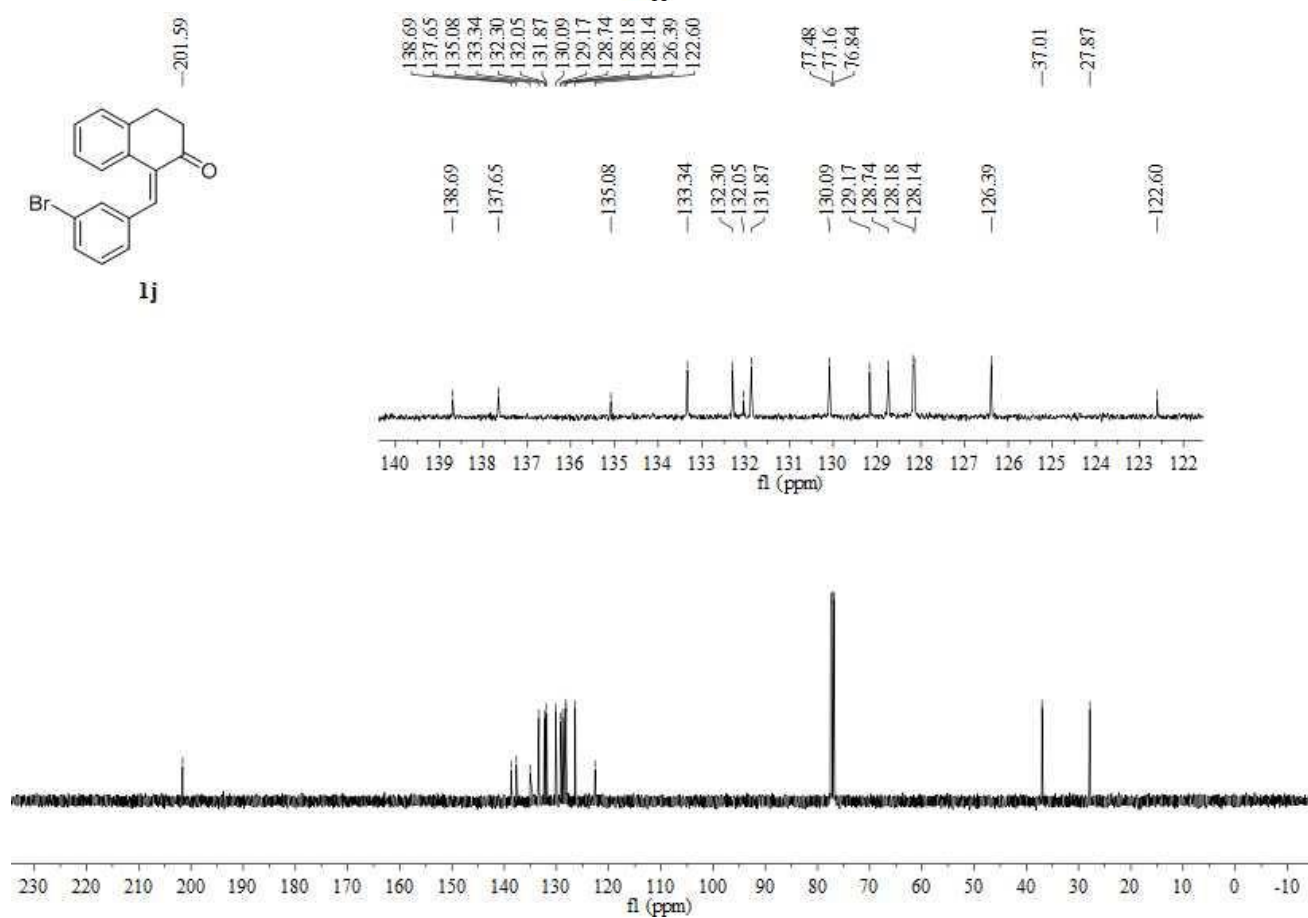

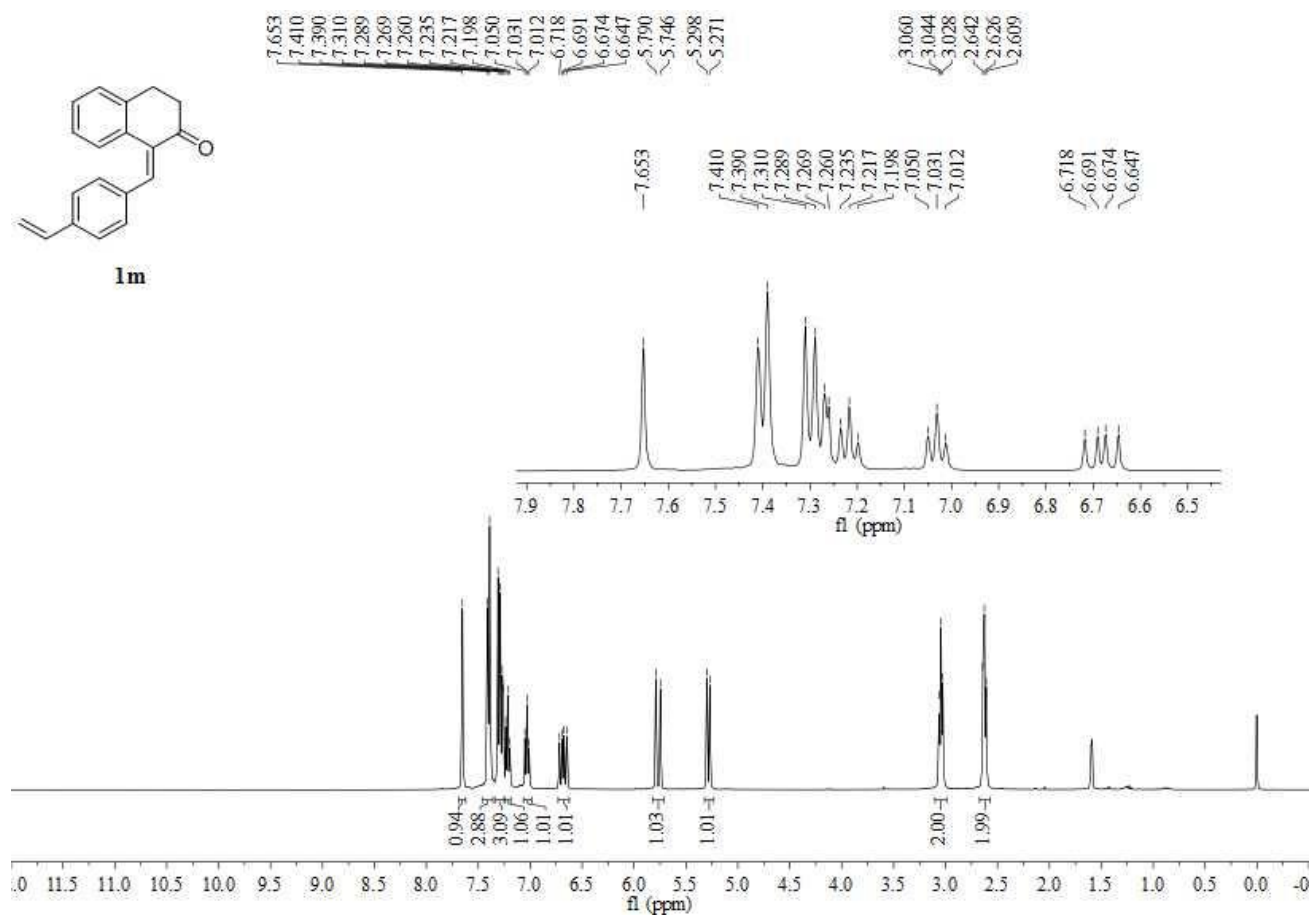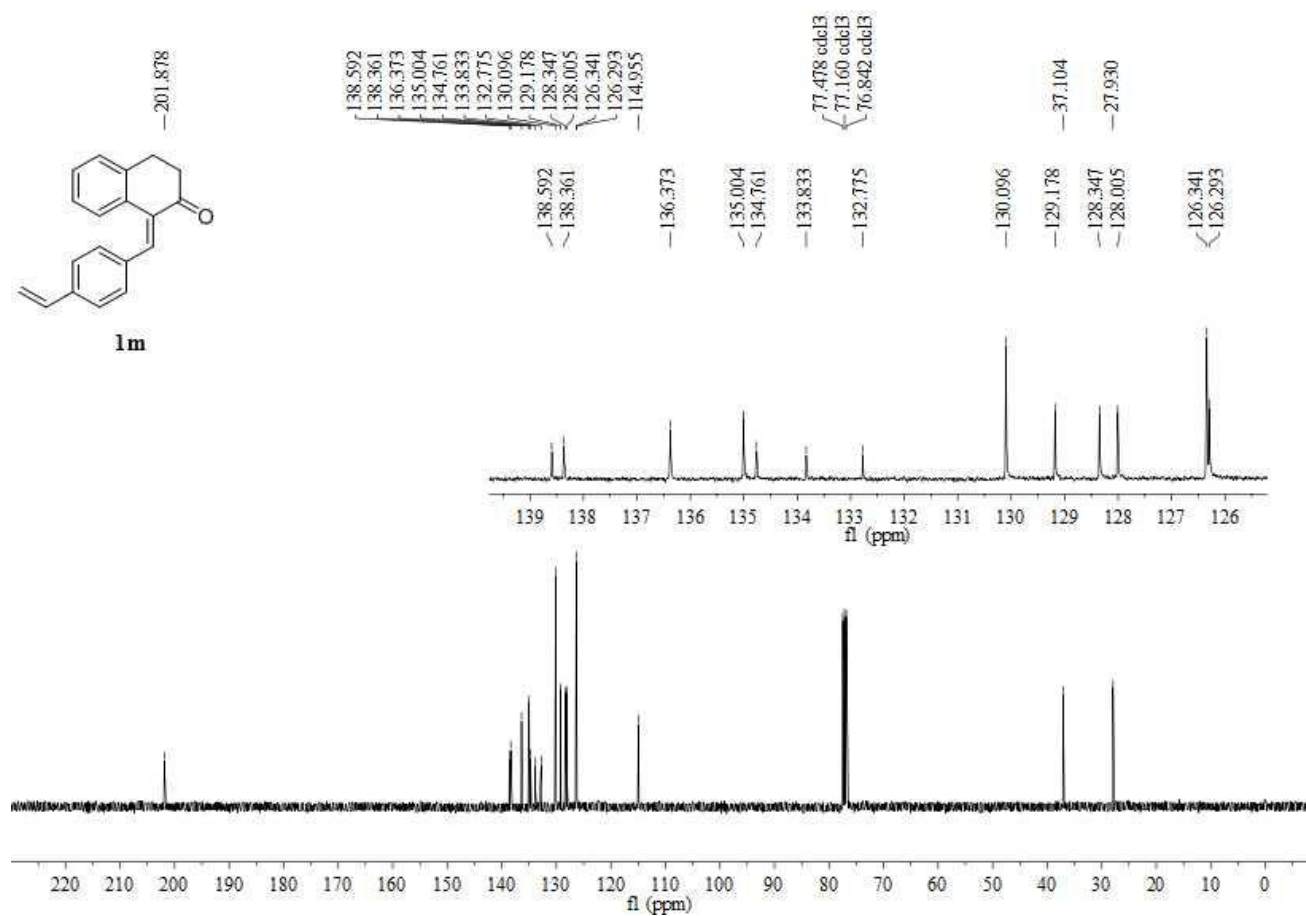

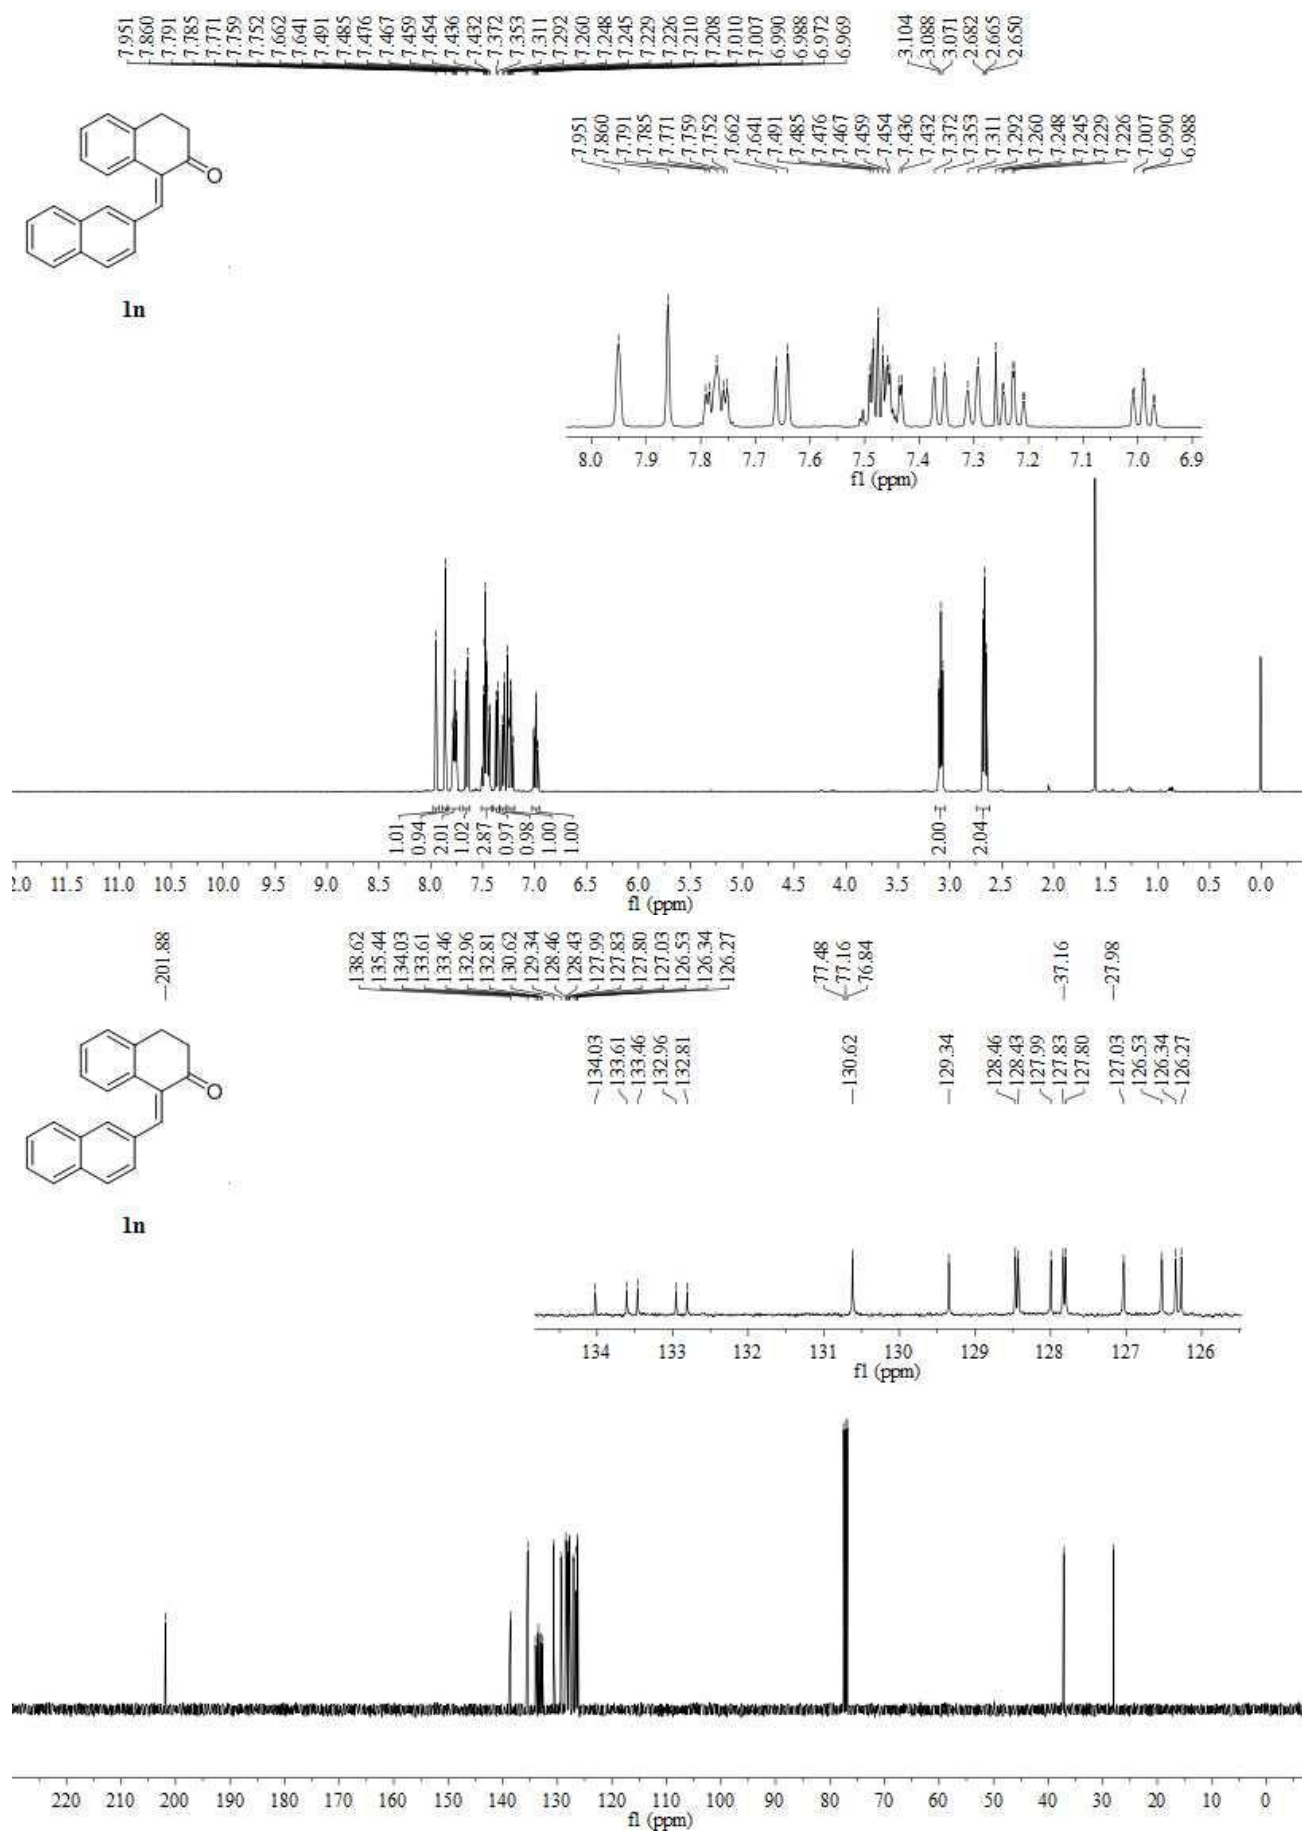

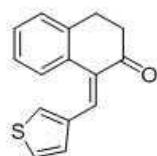

1q

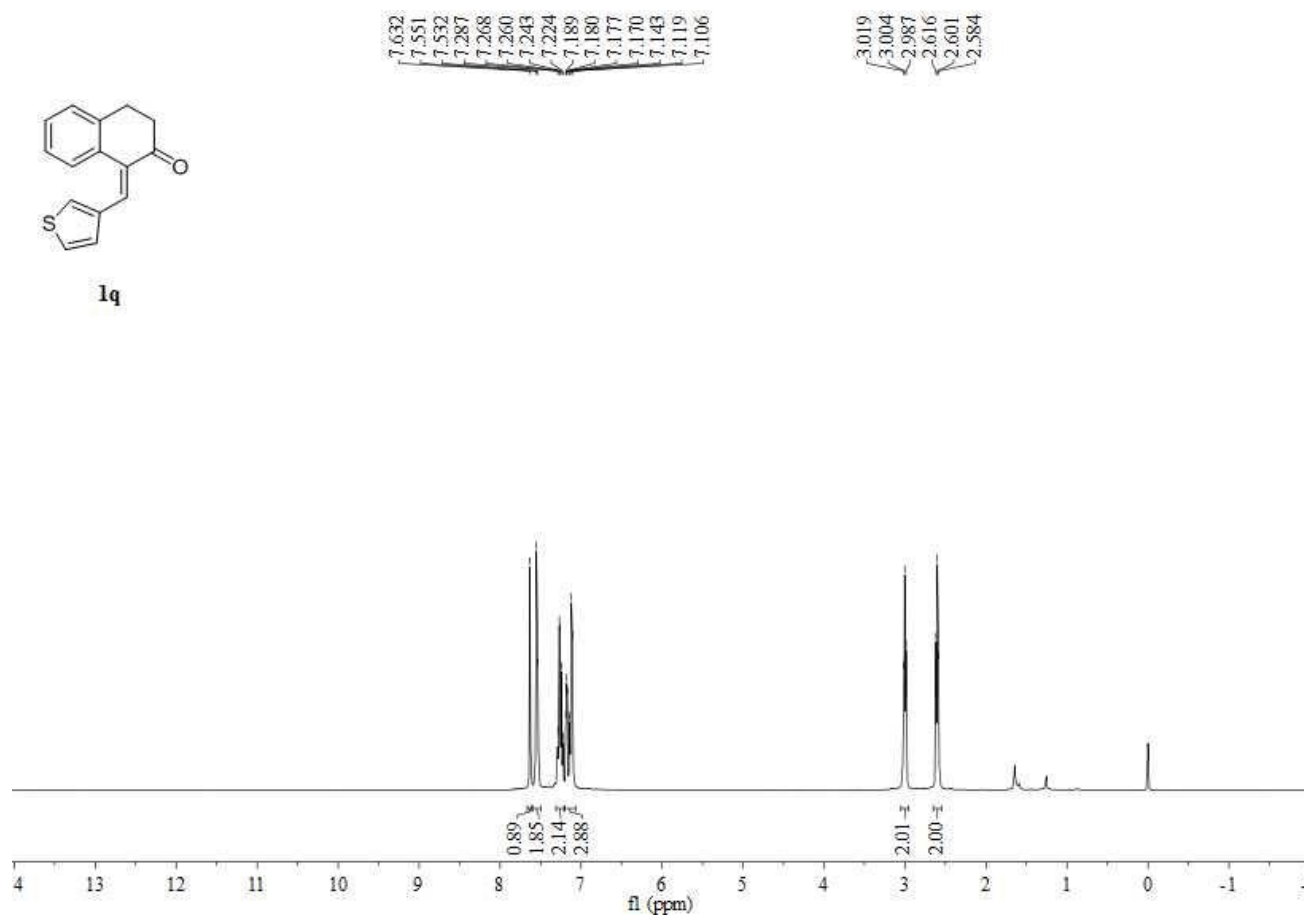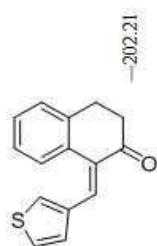

1q

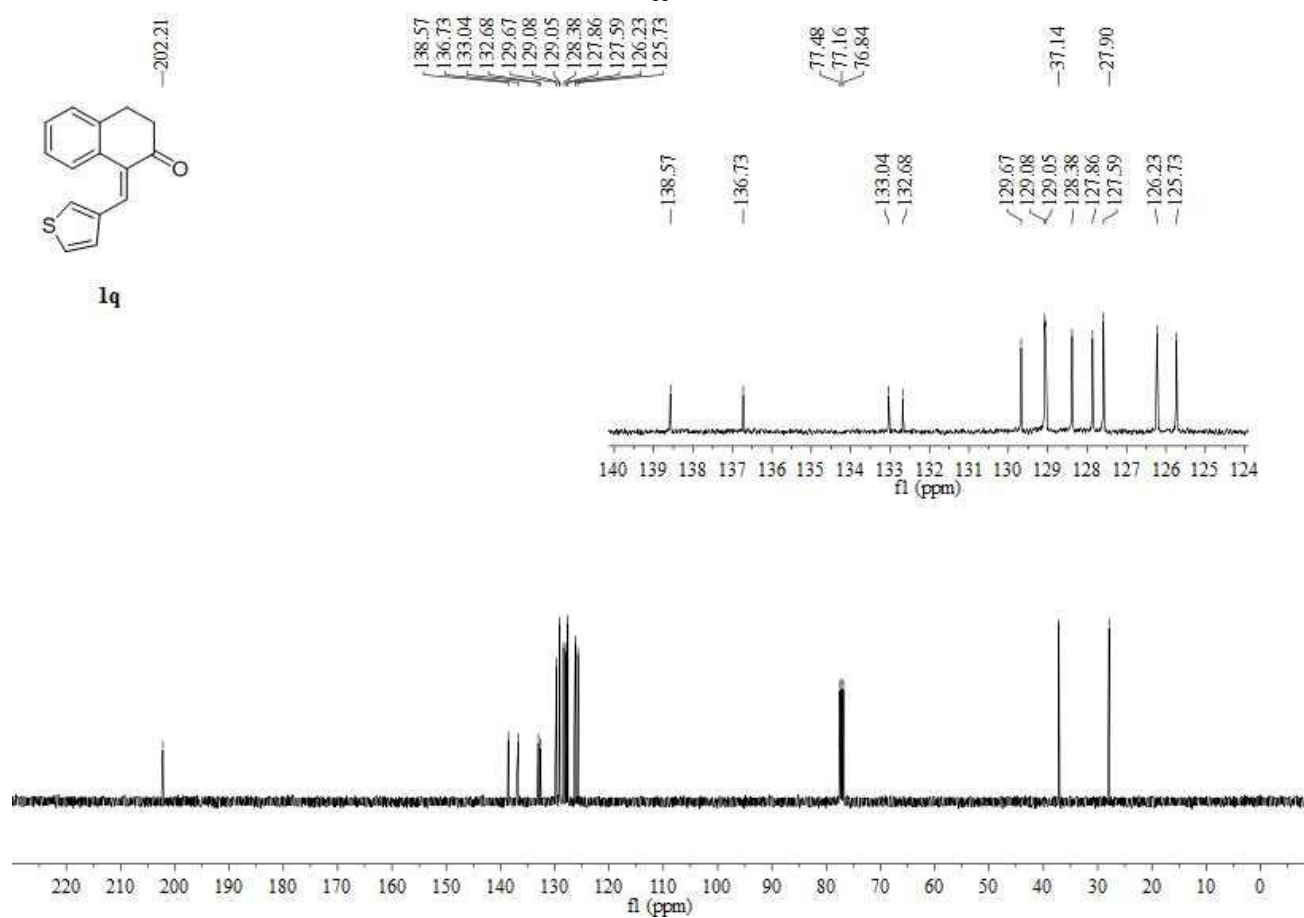

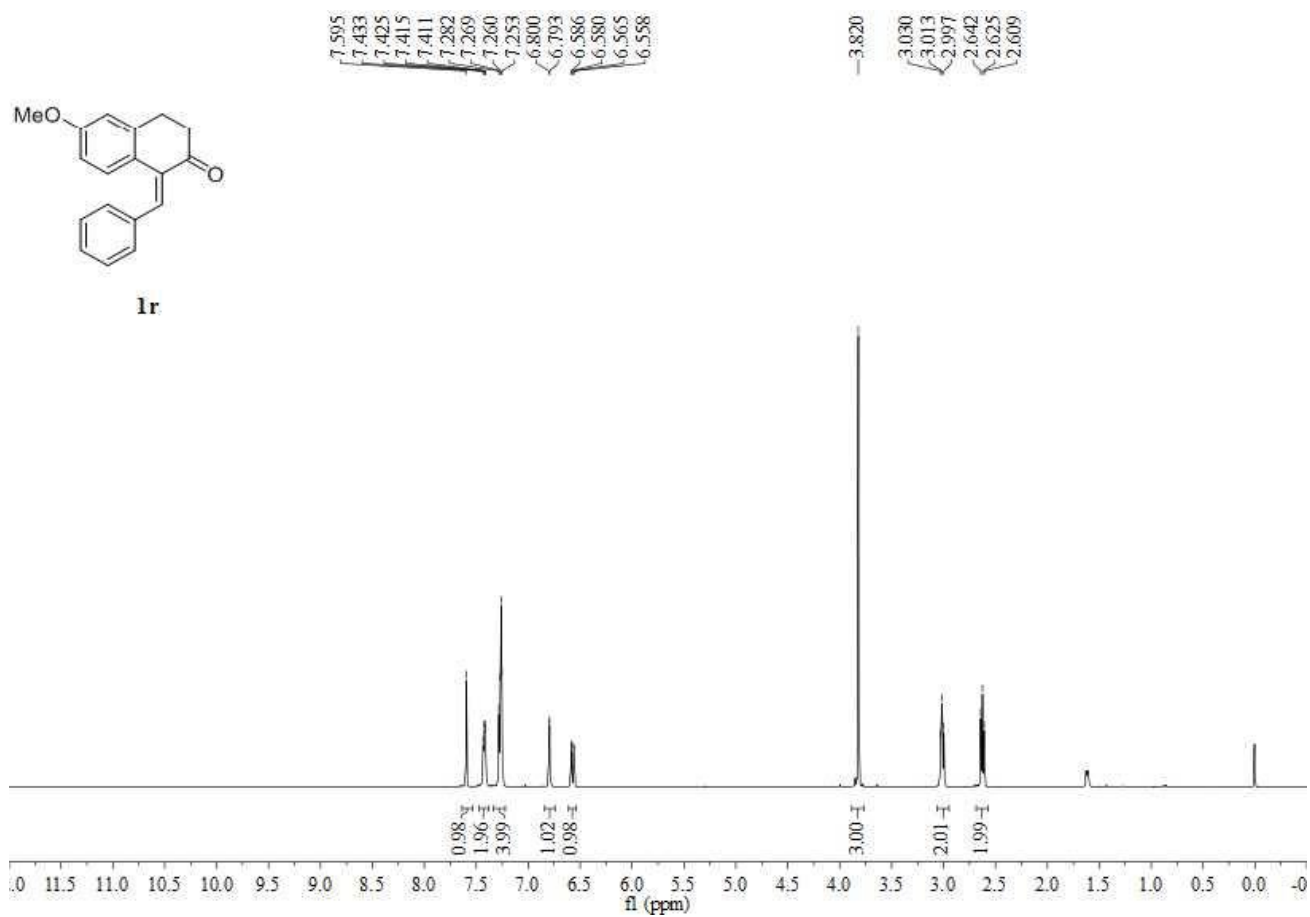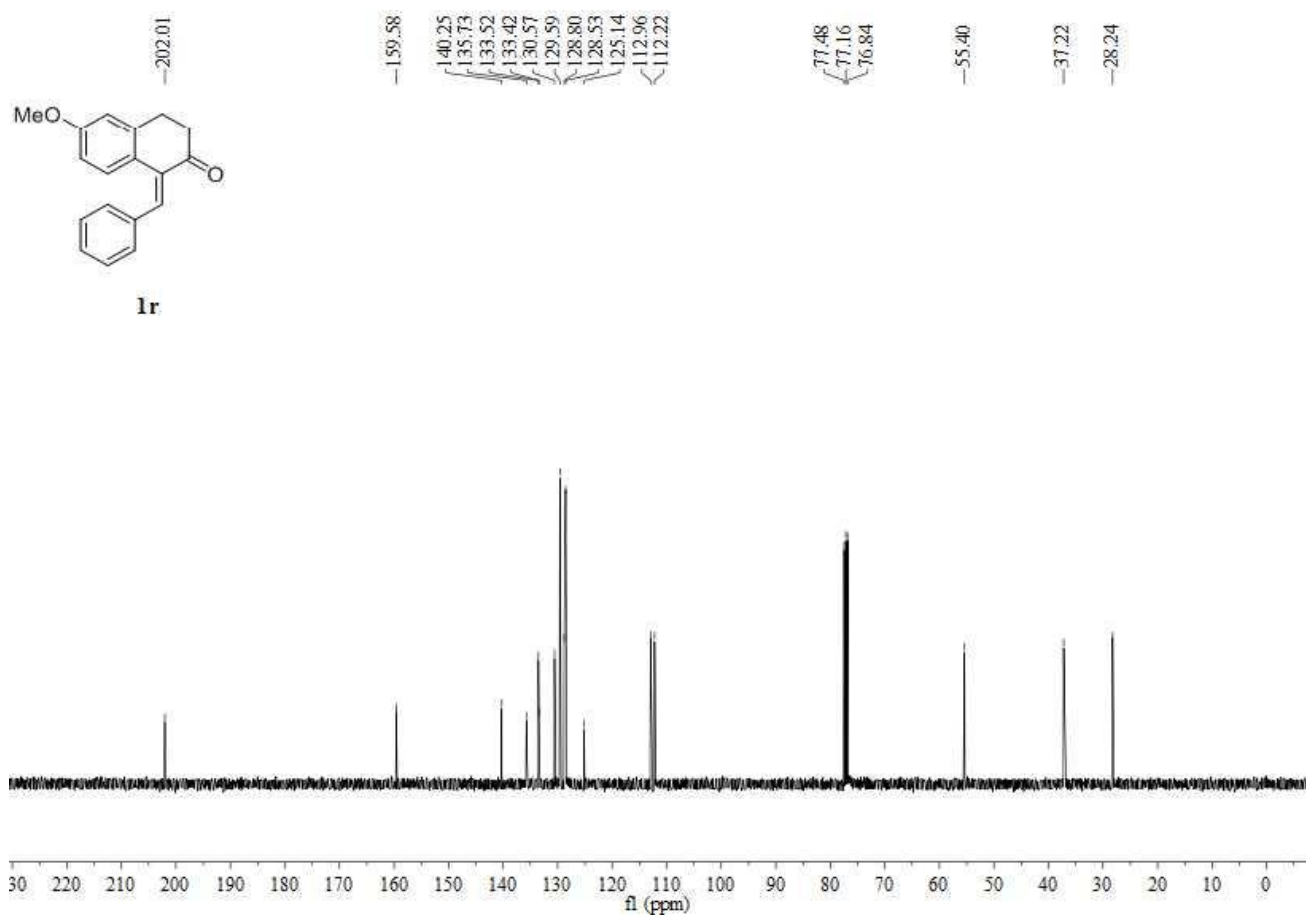

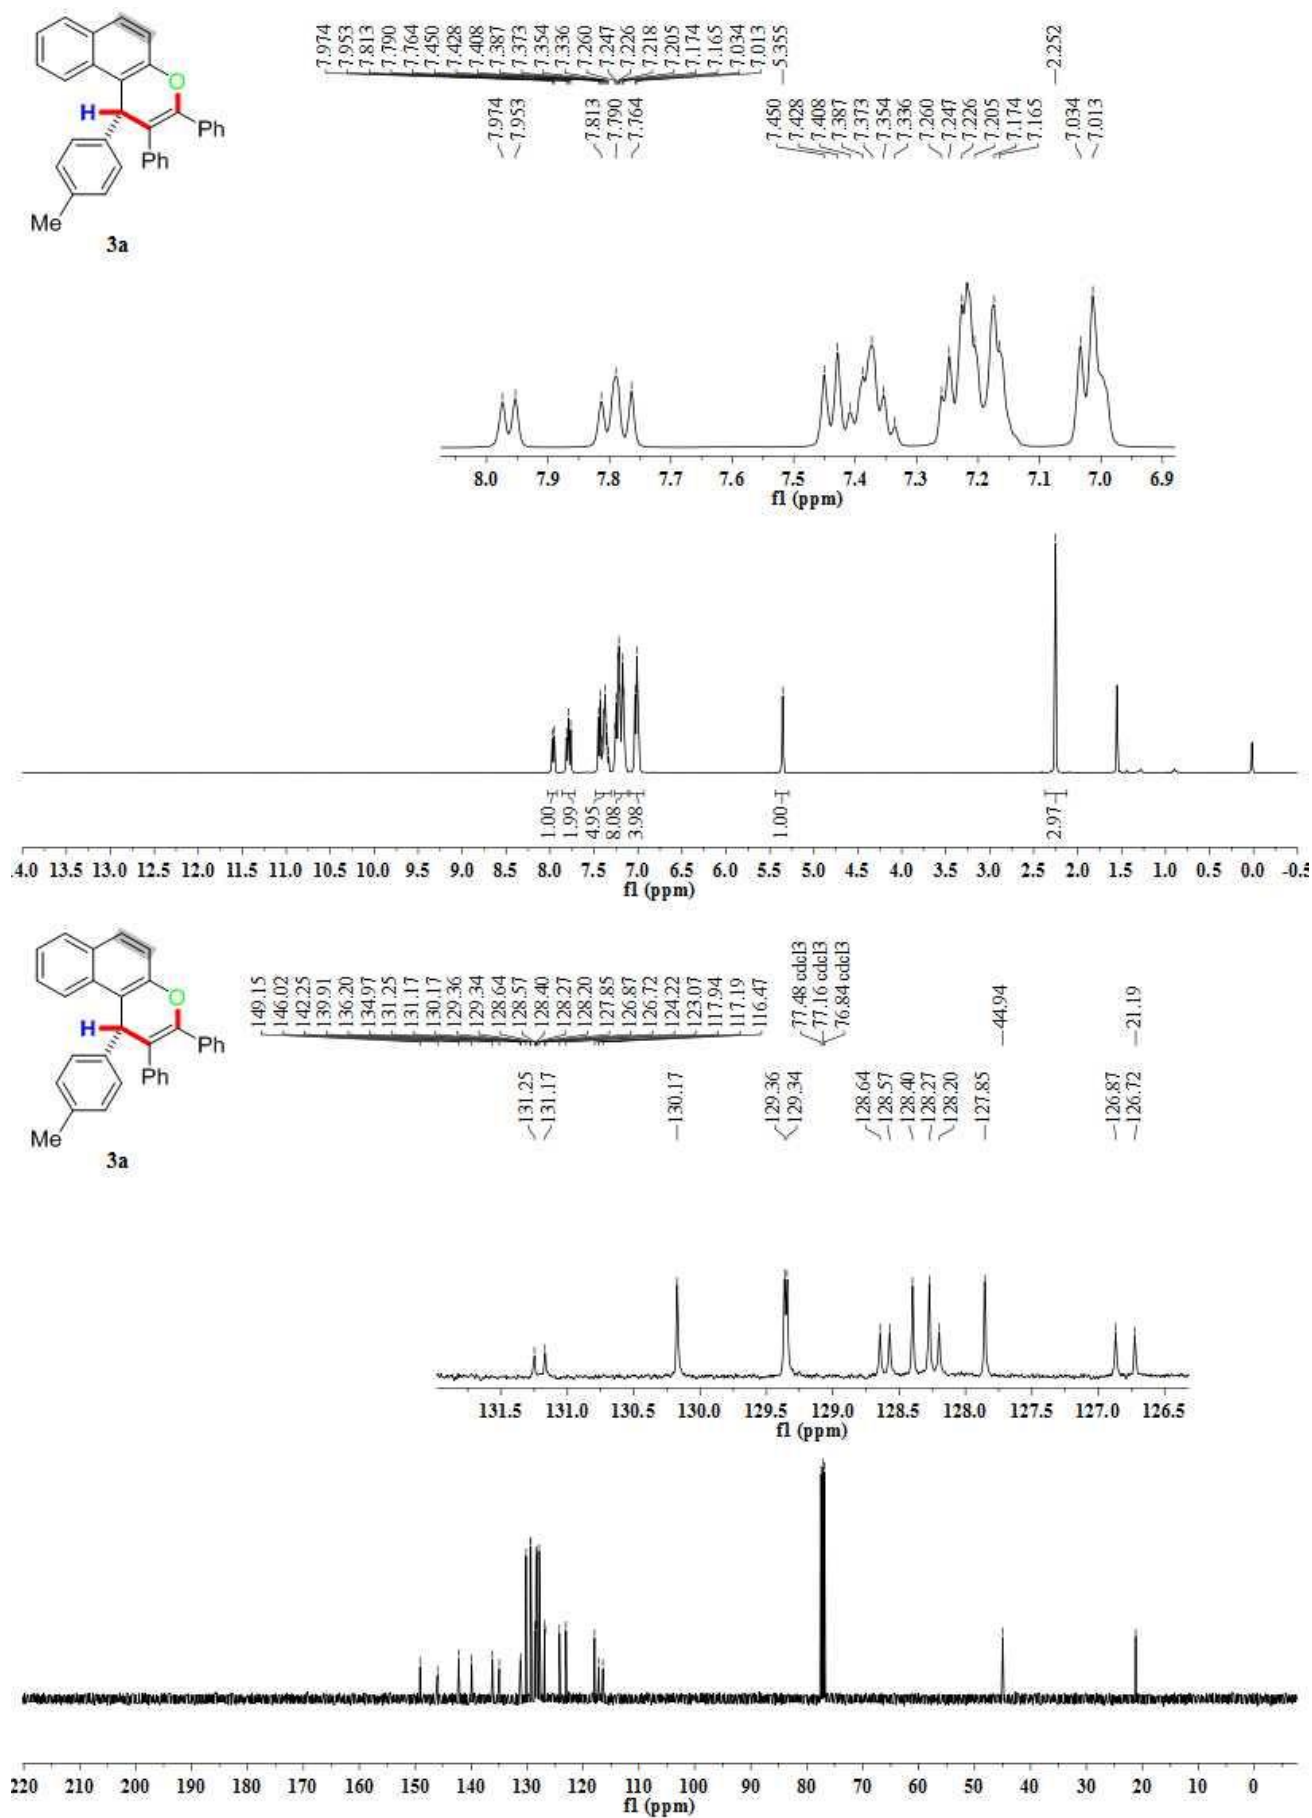



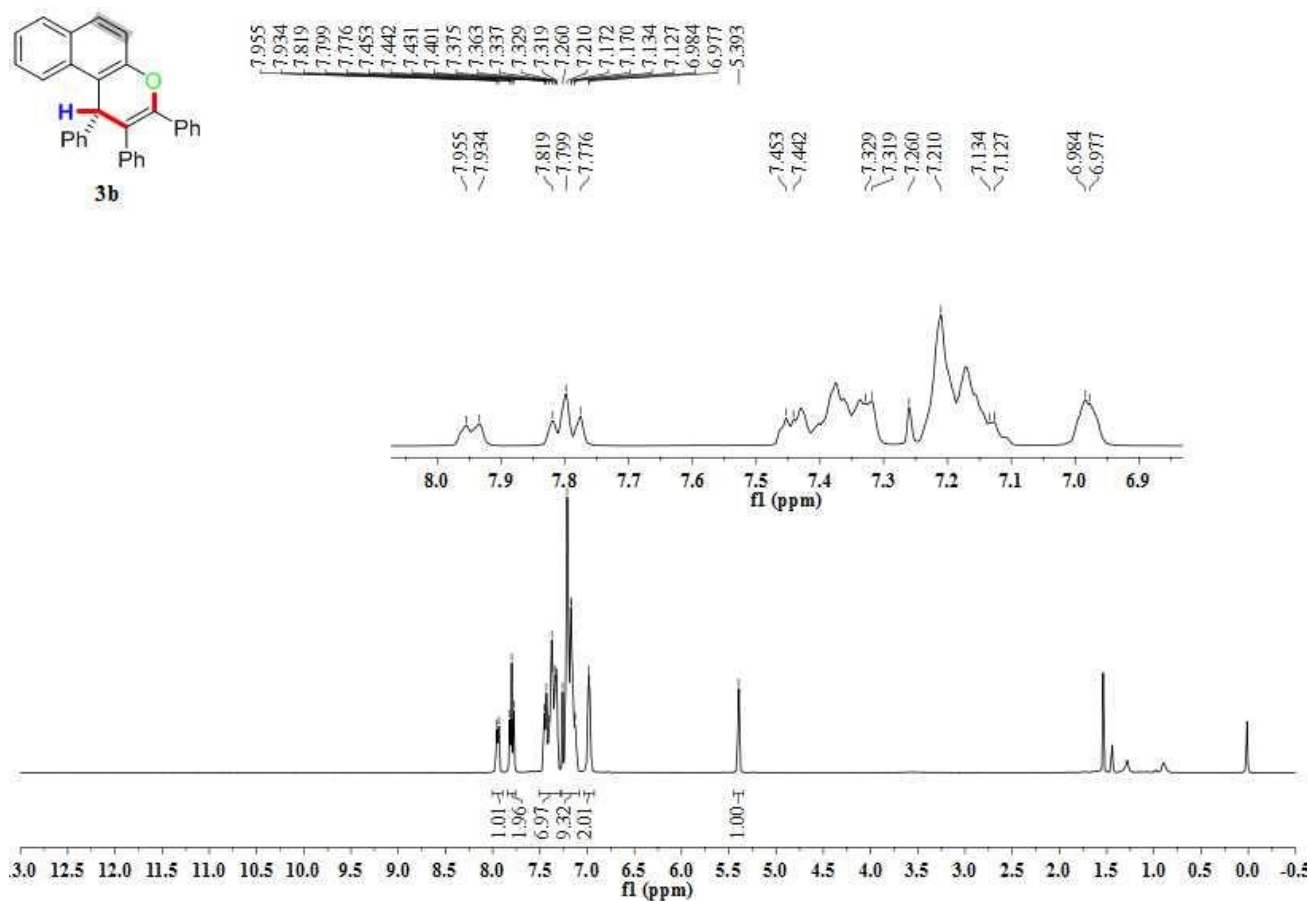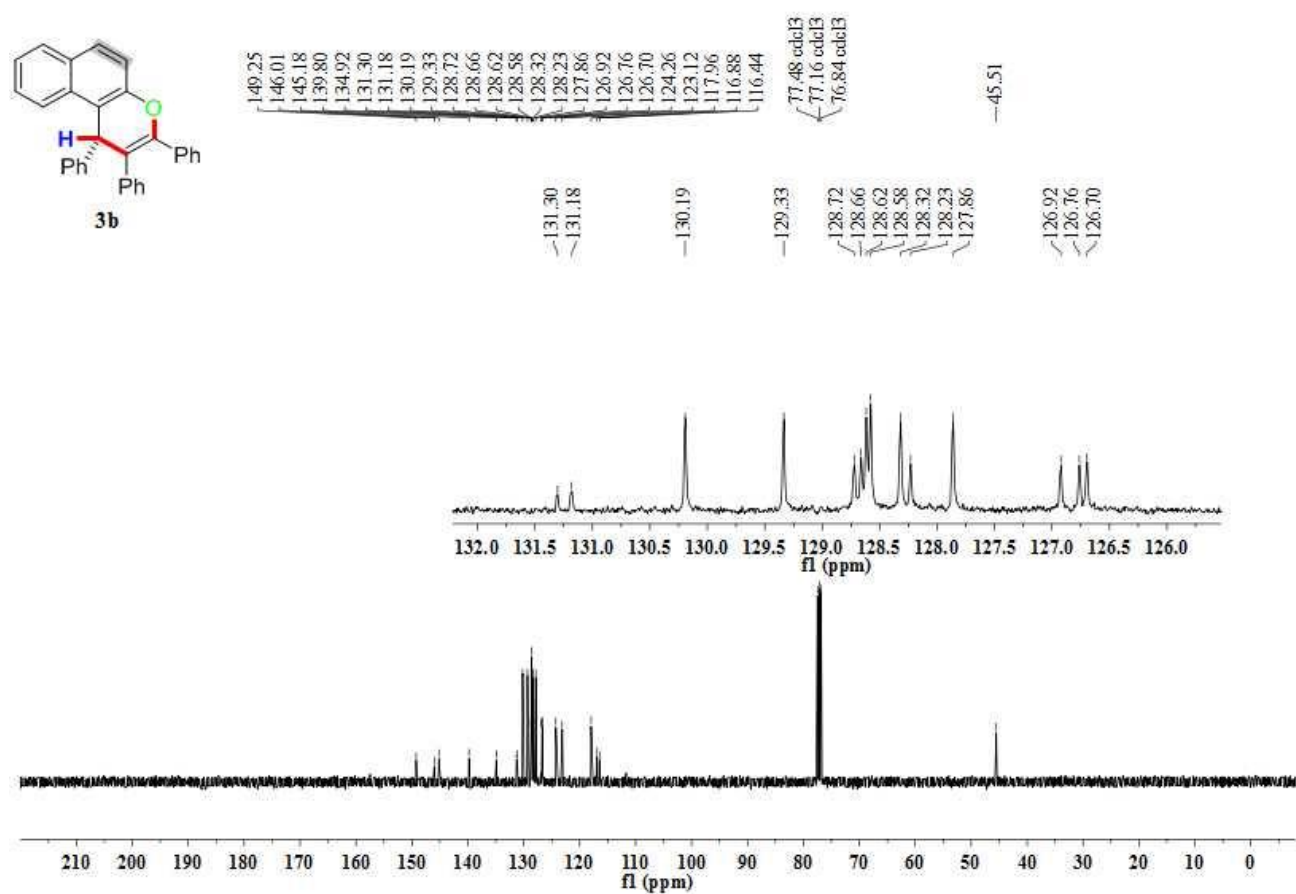

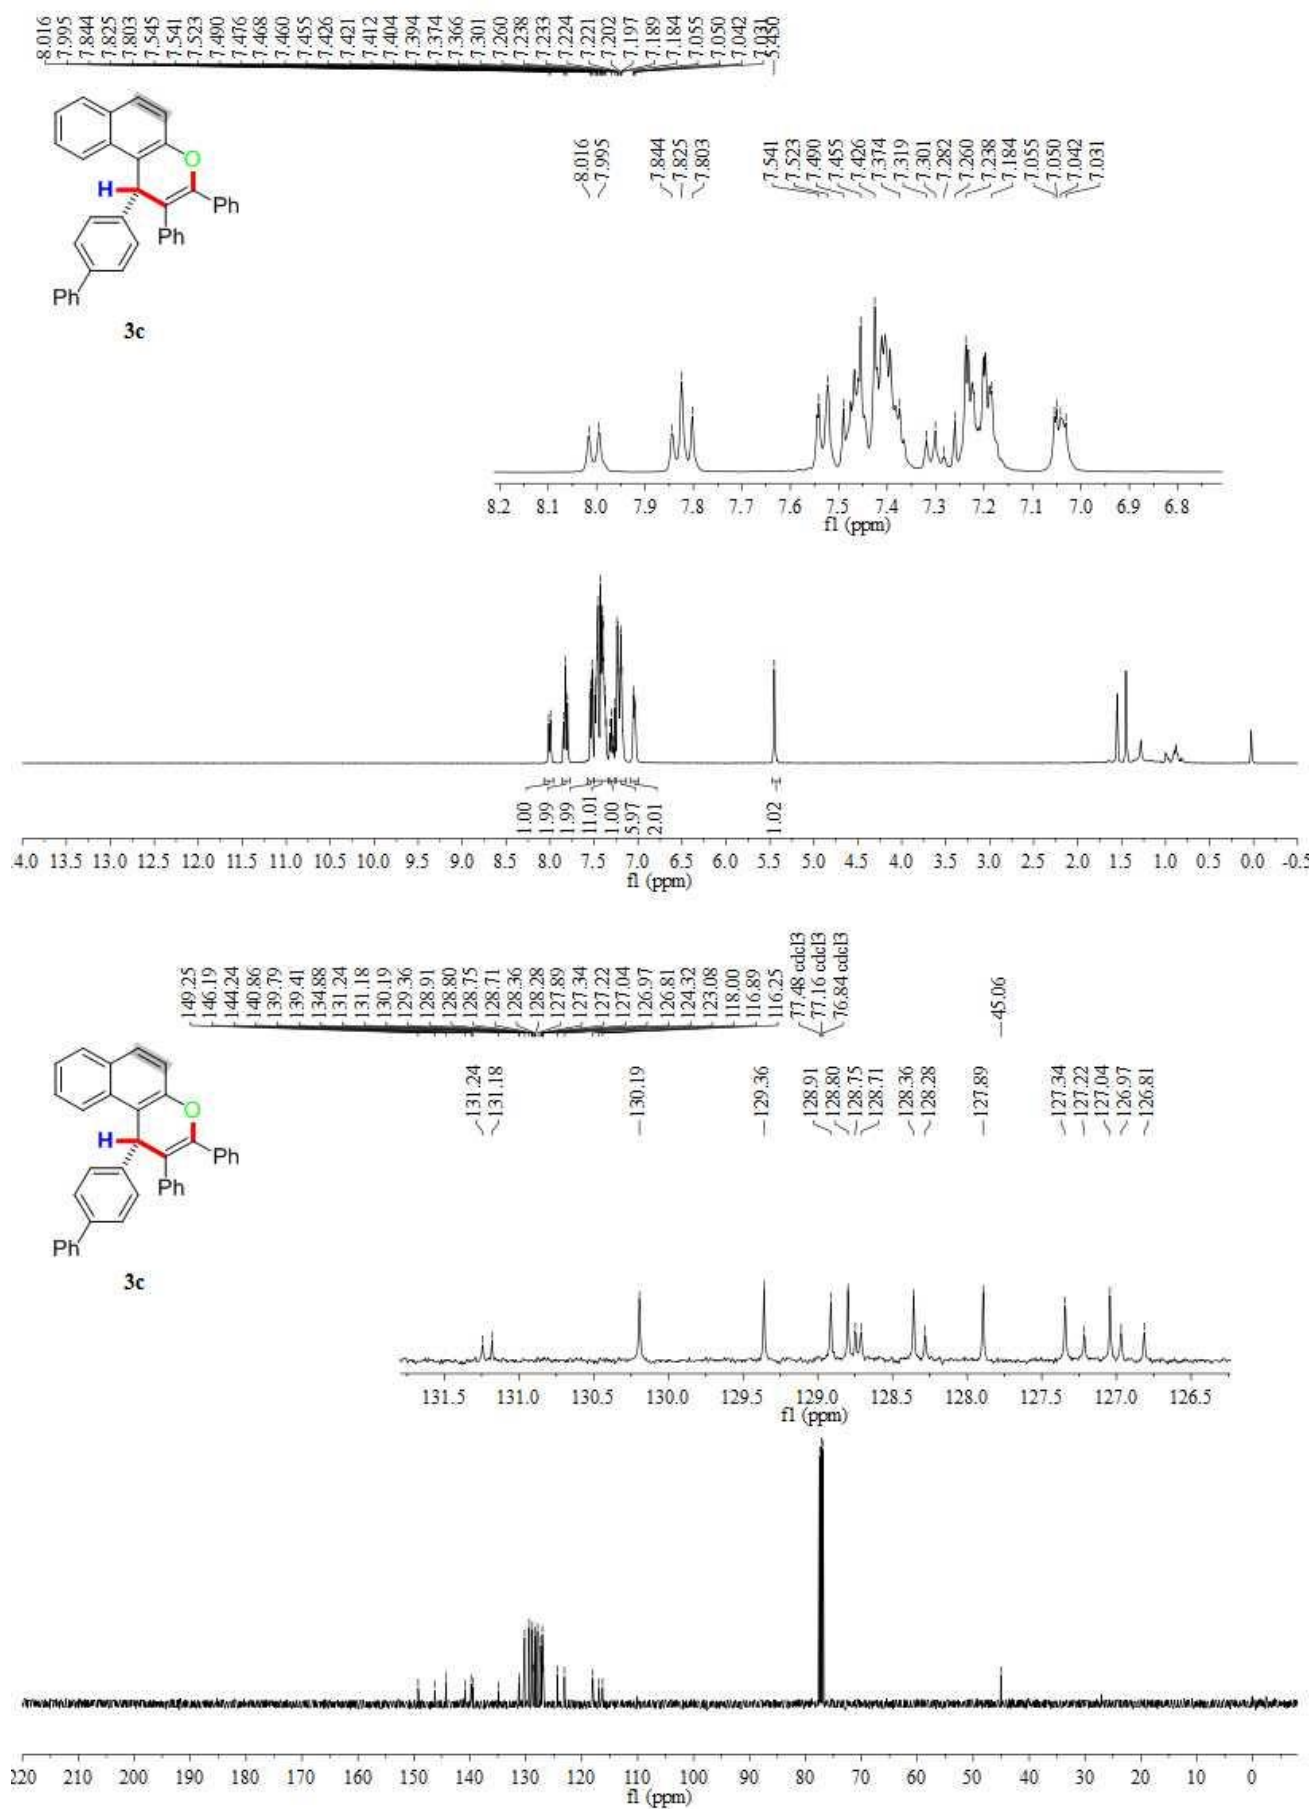



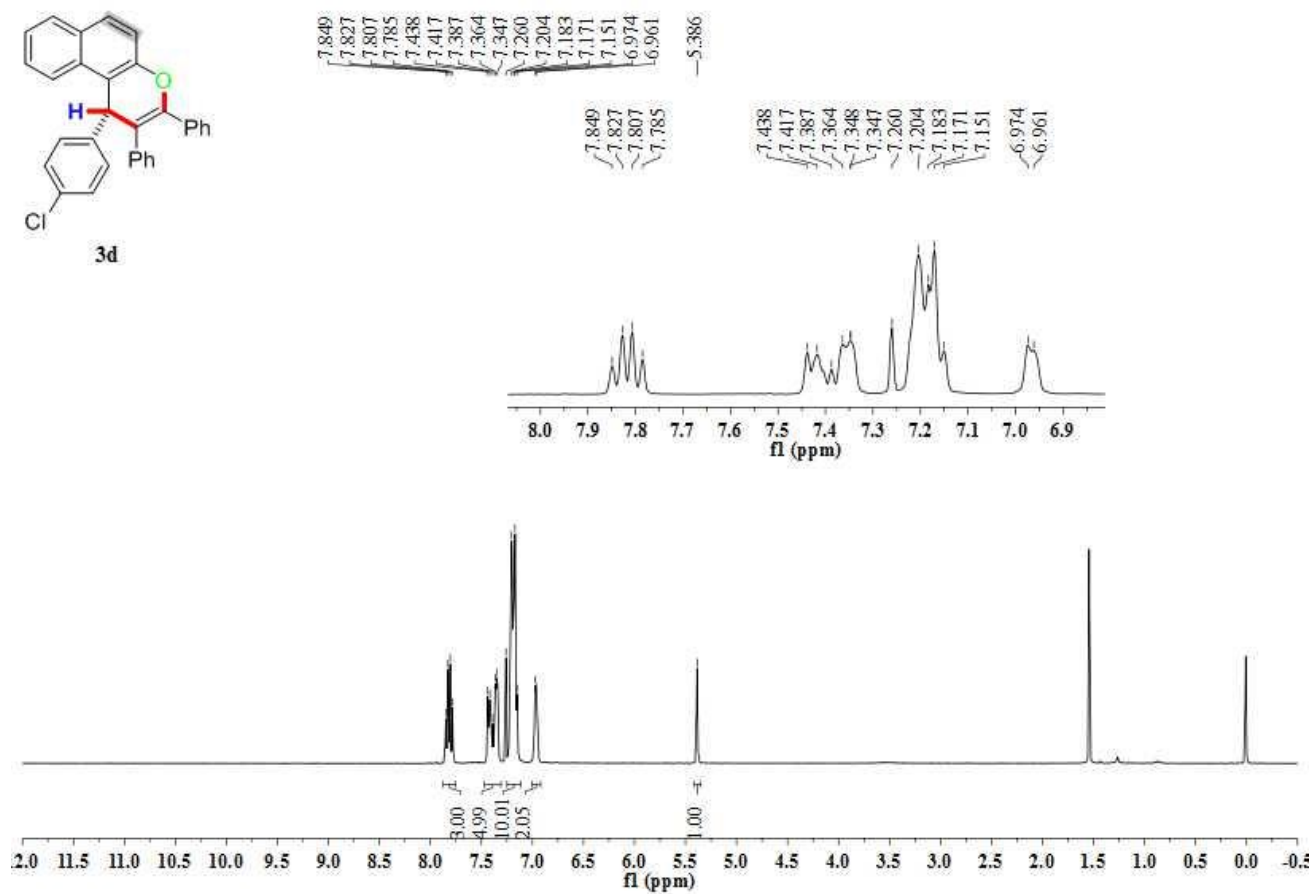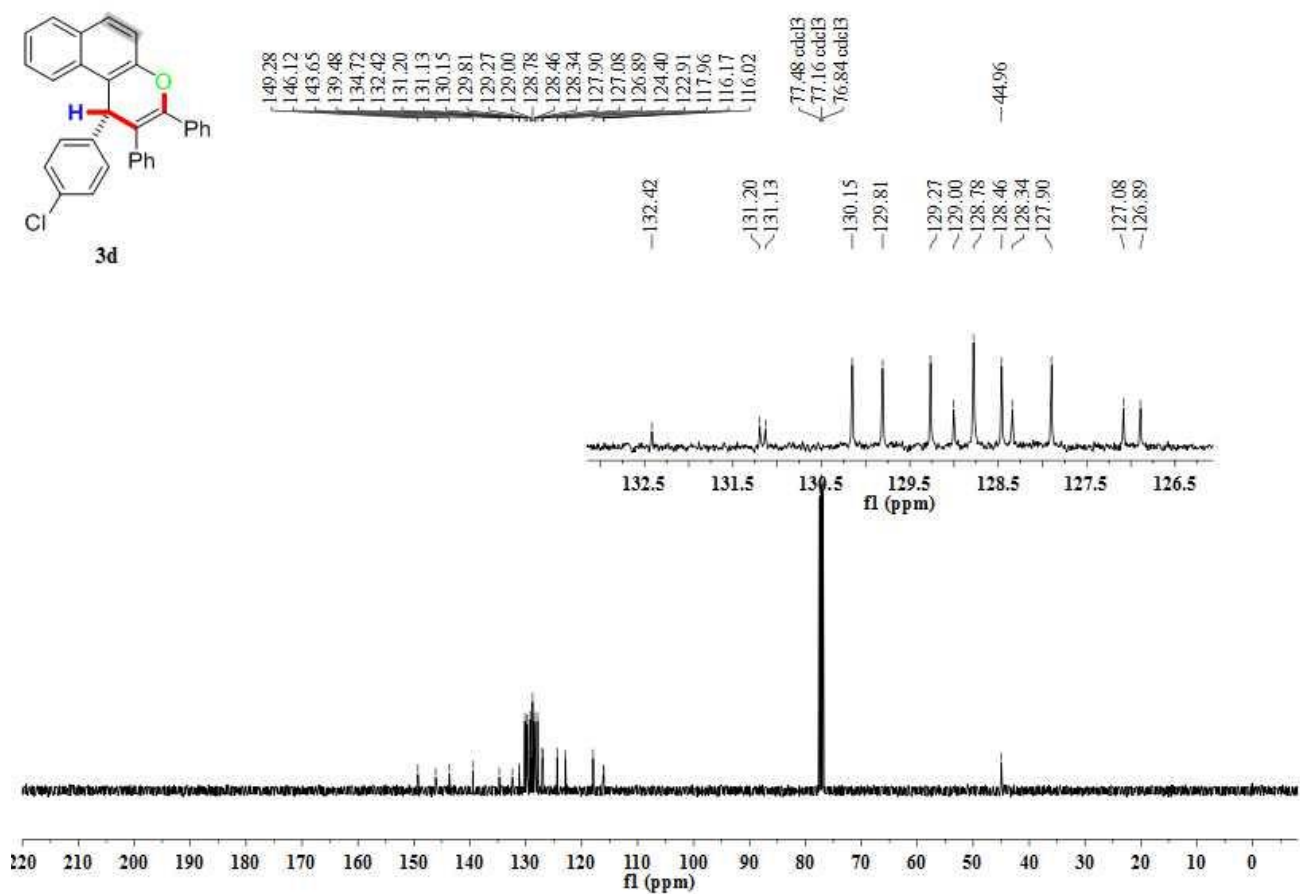

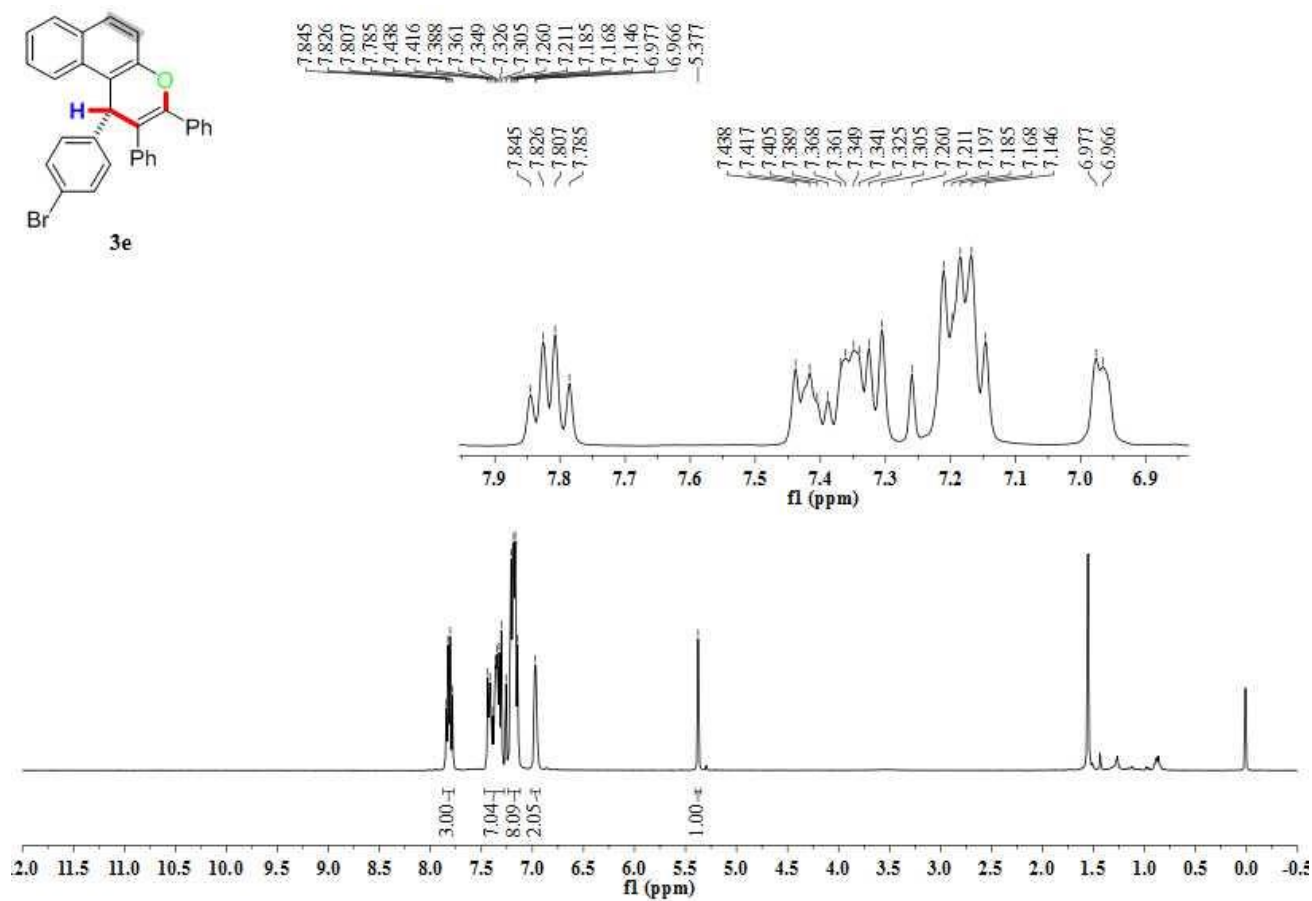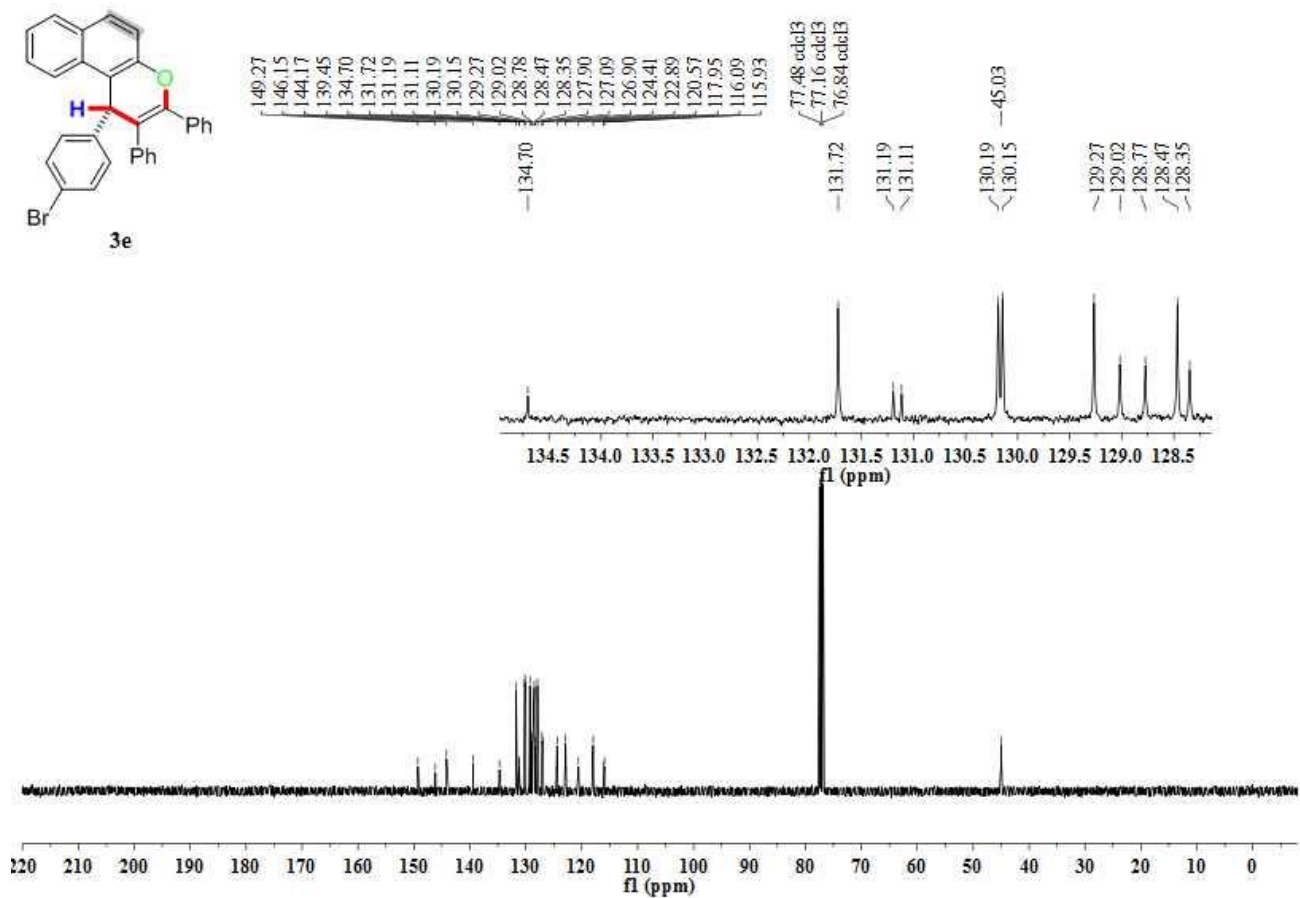

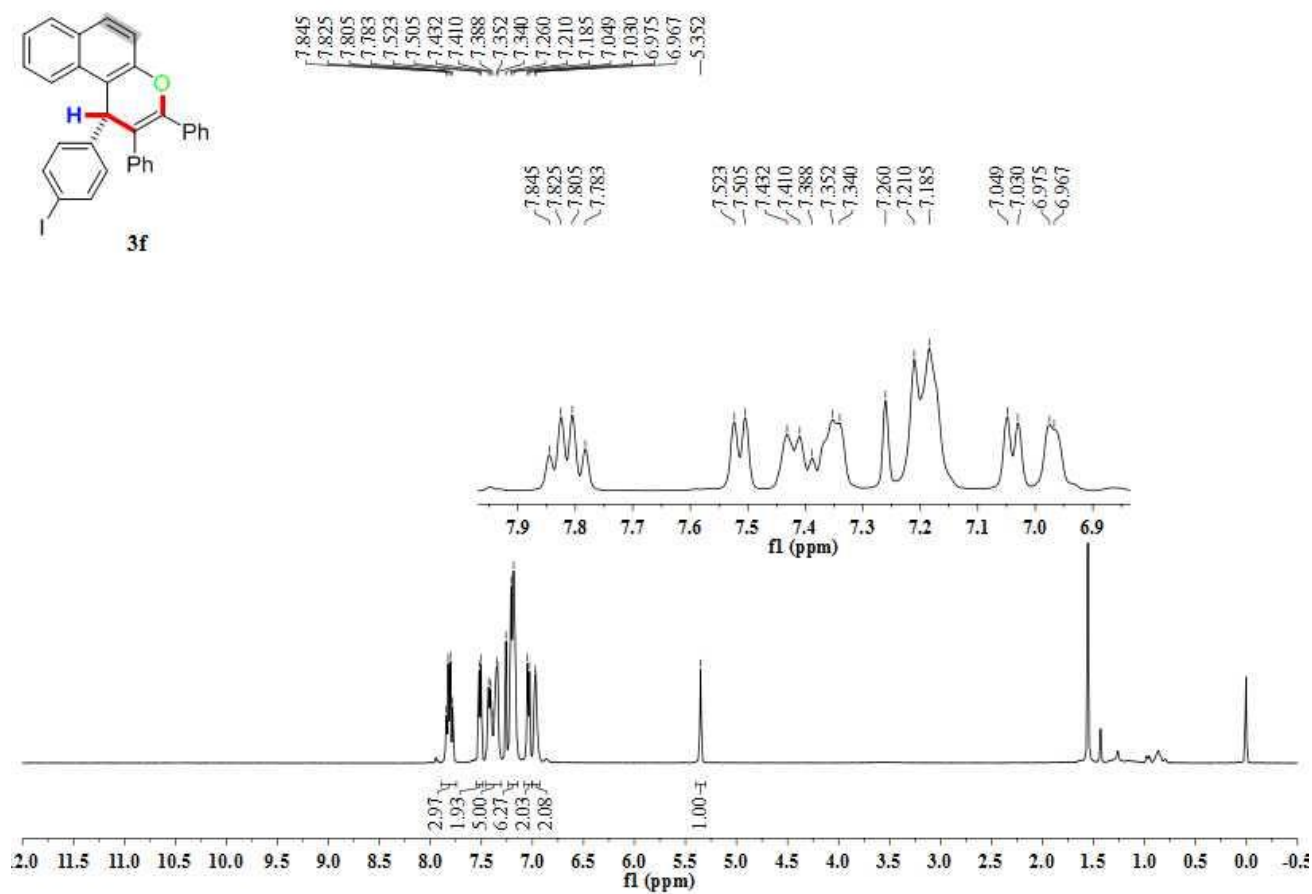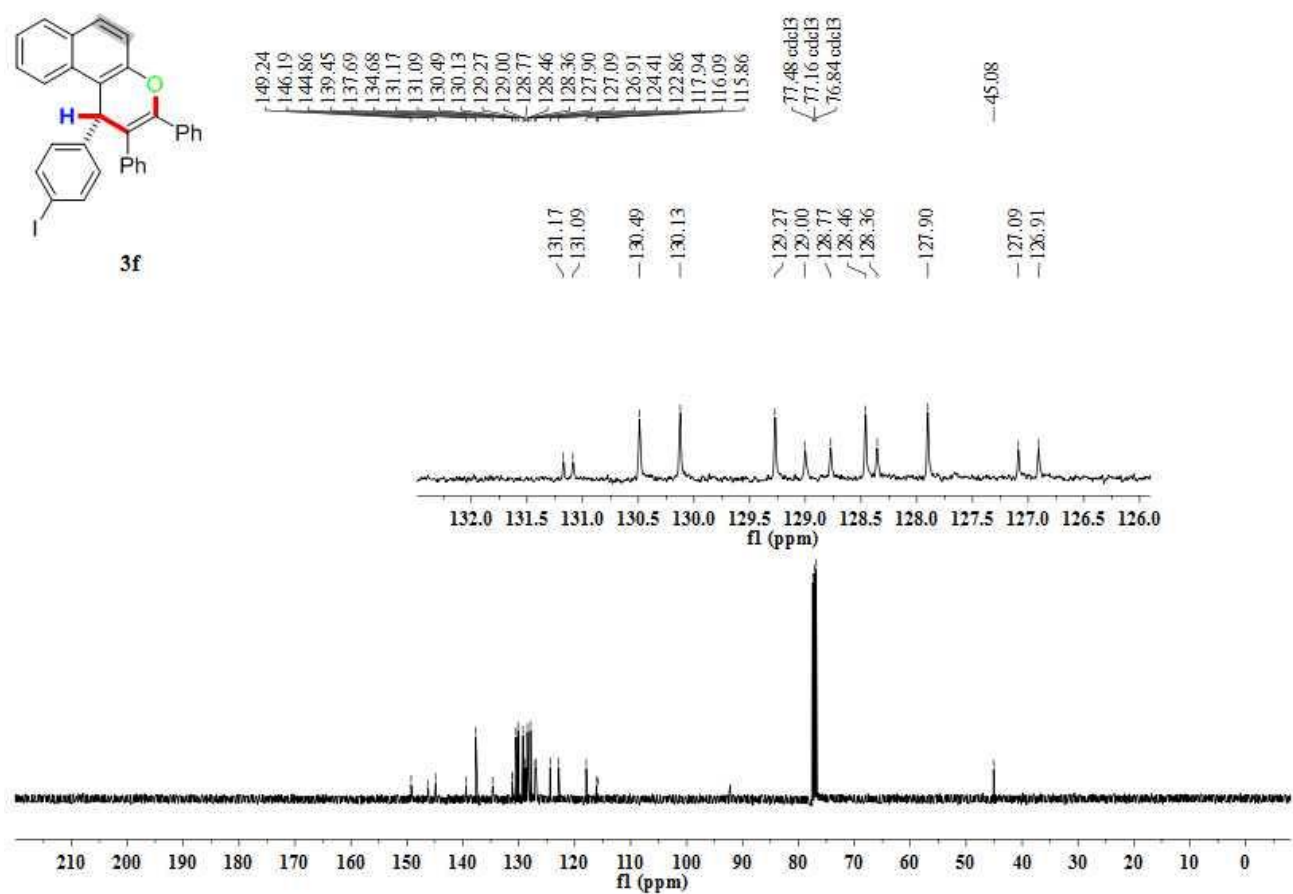

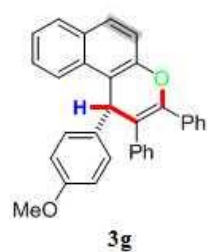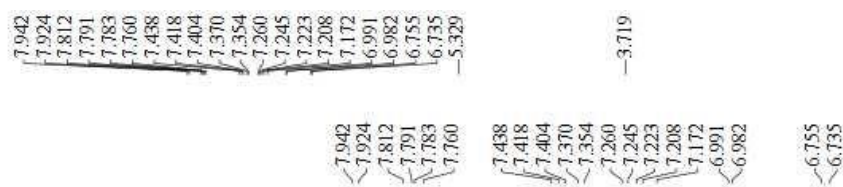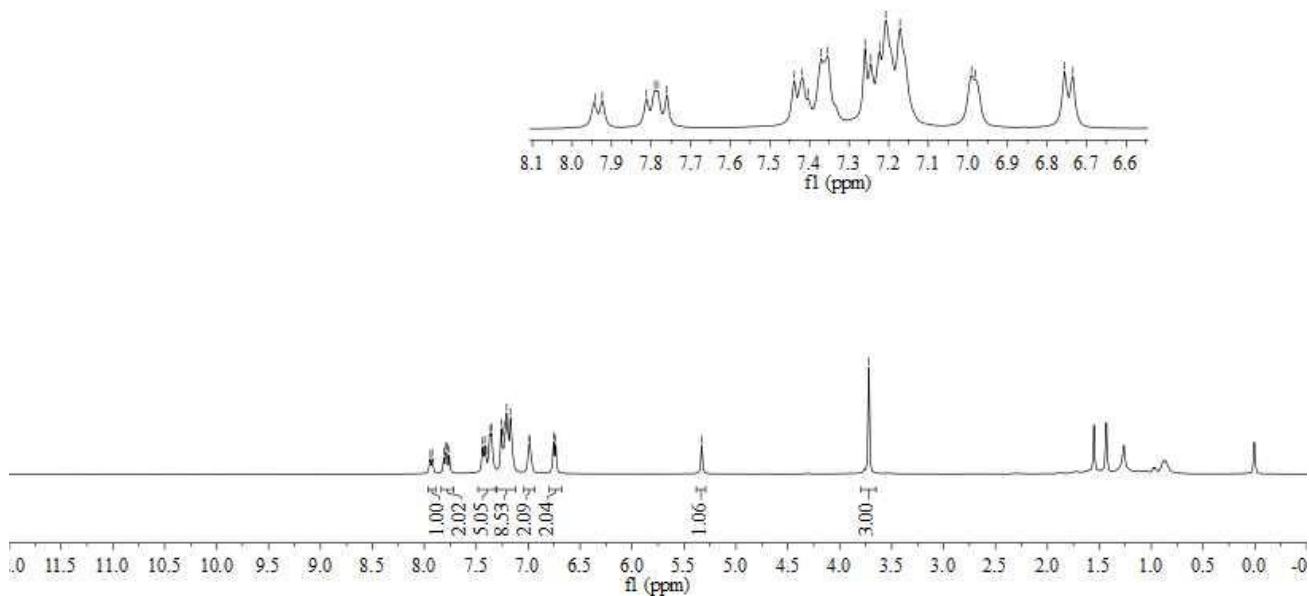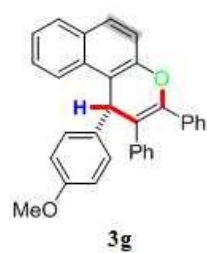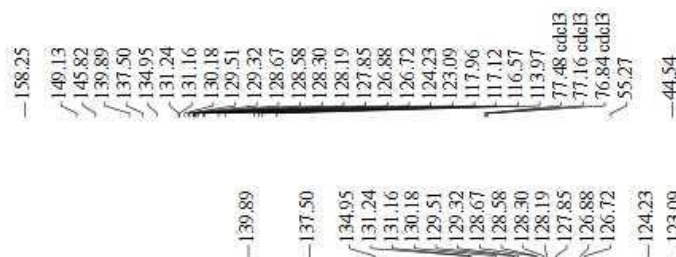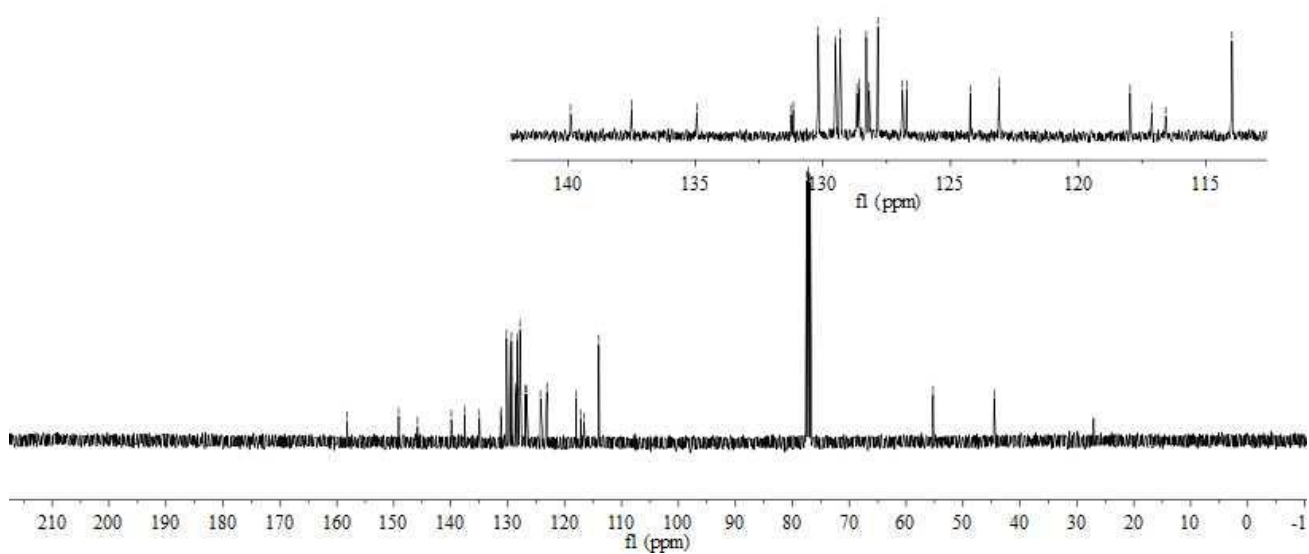

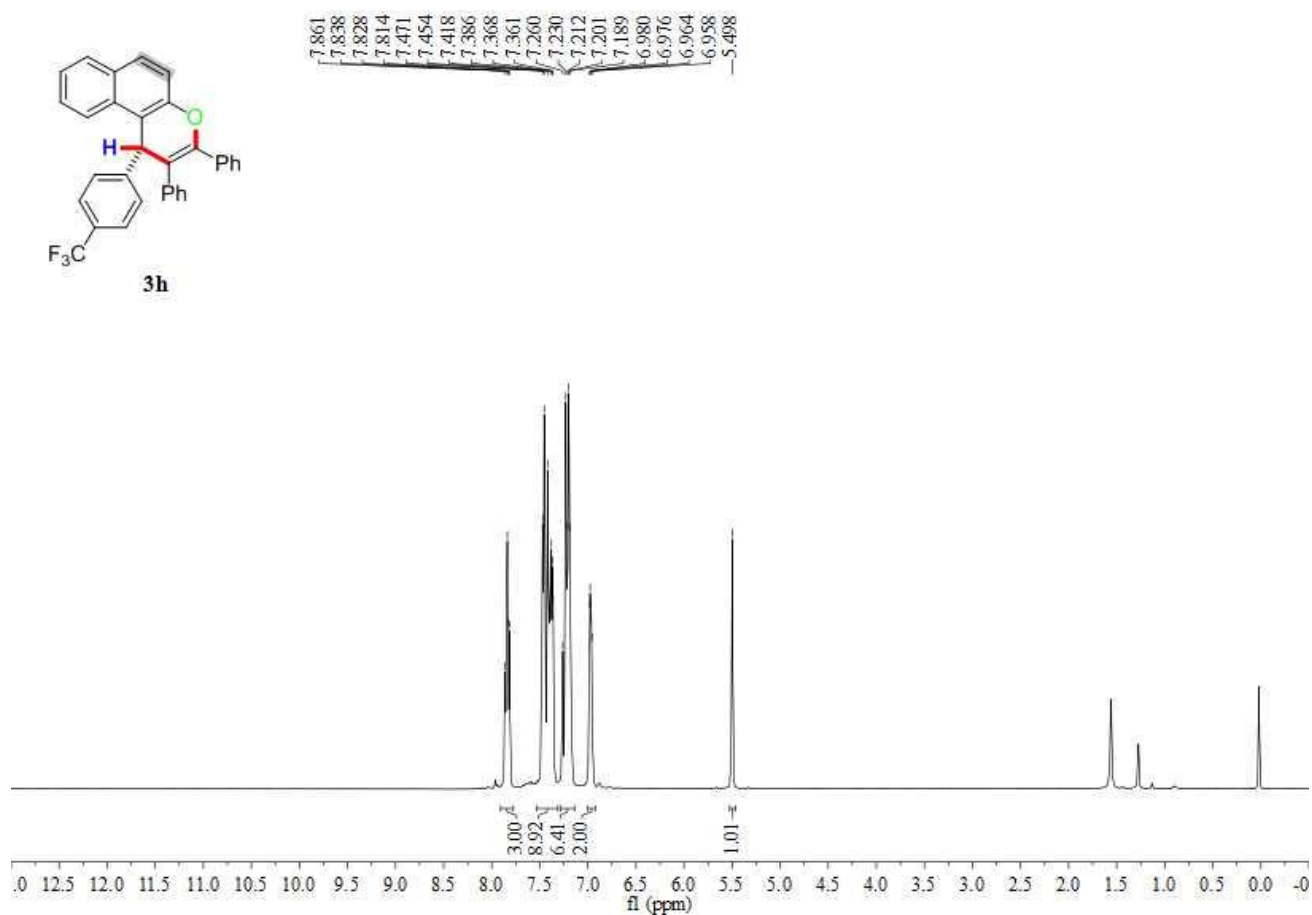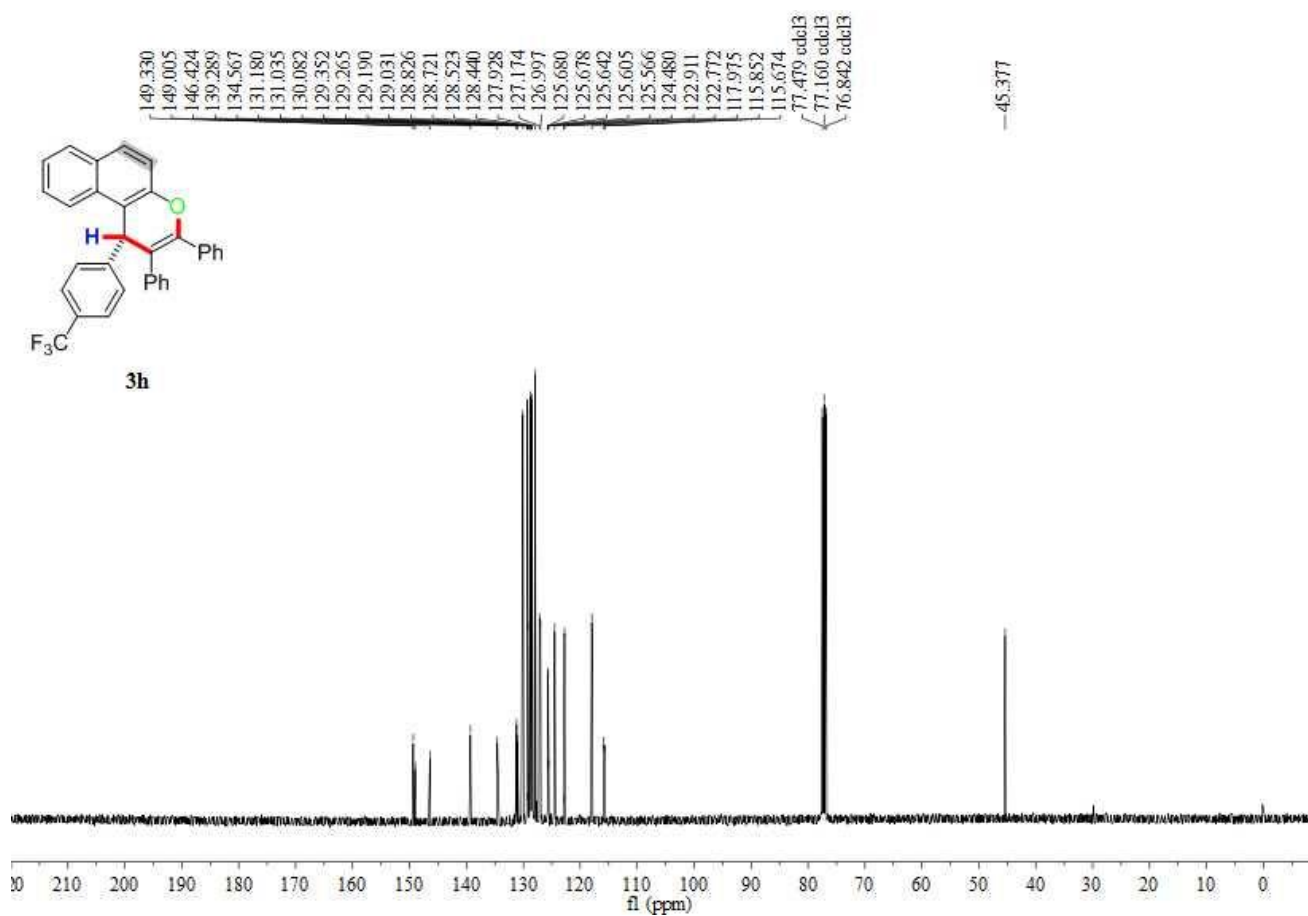



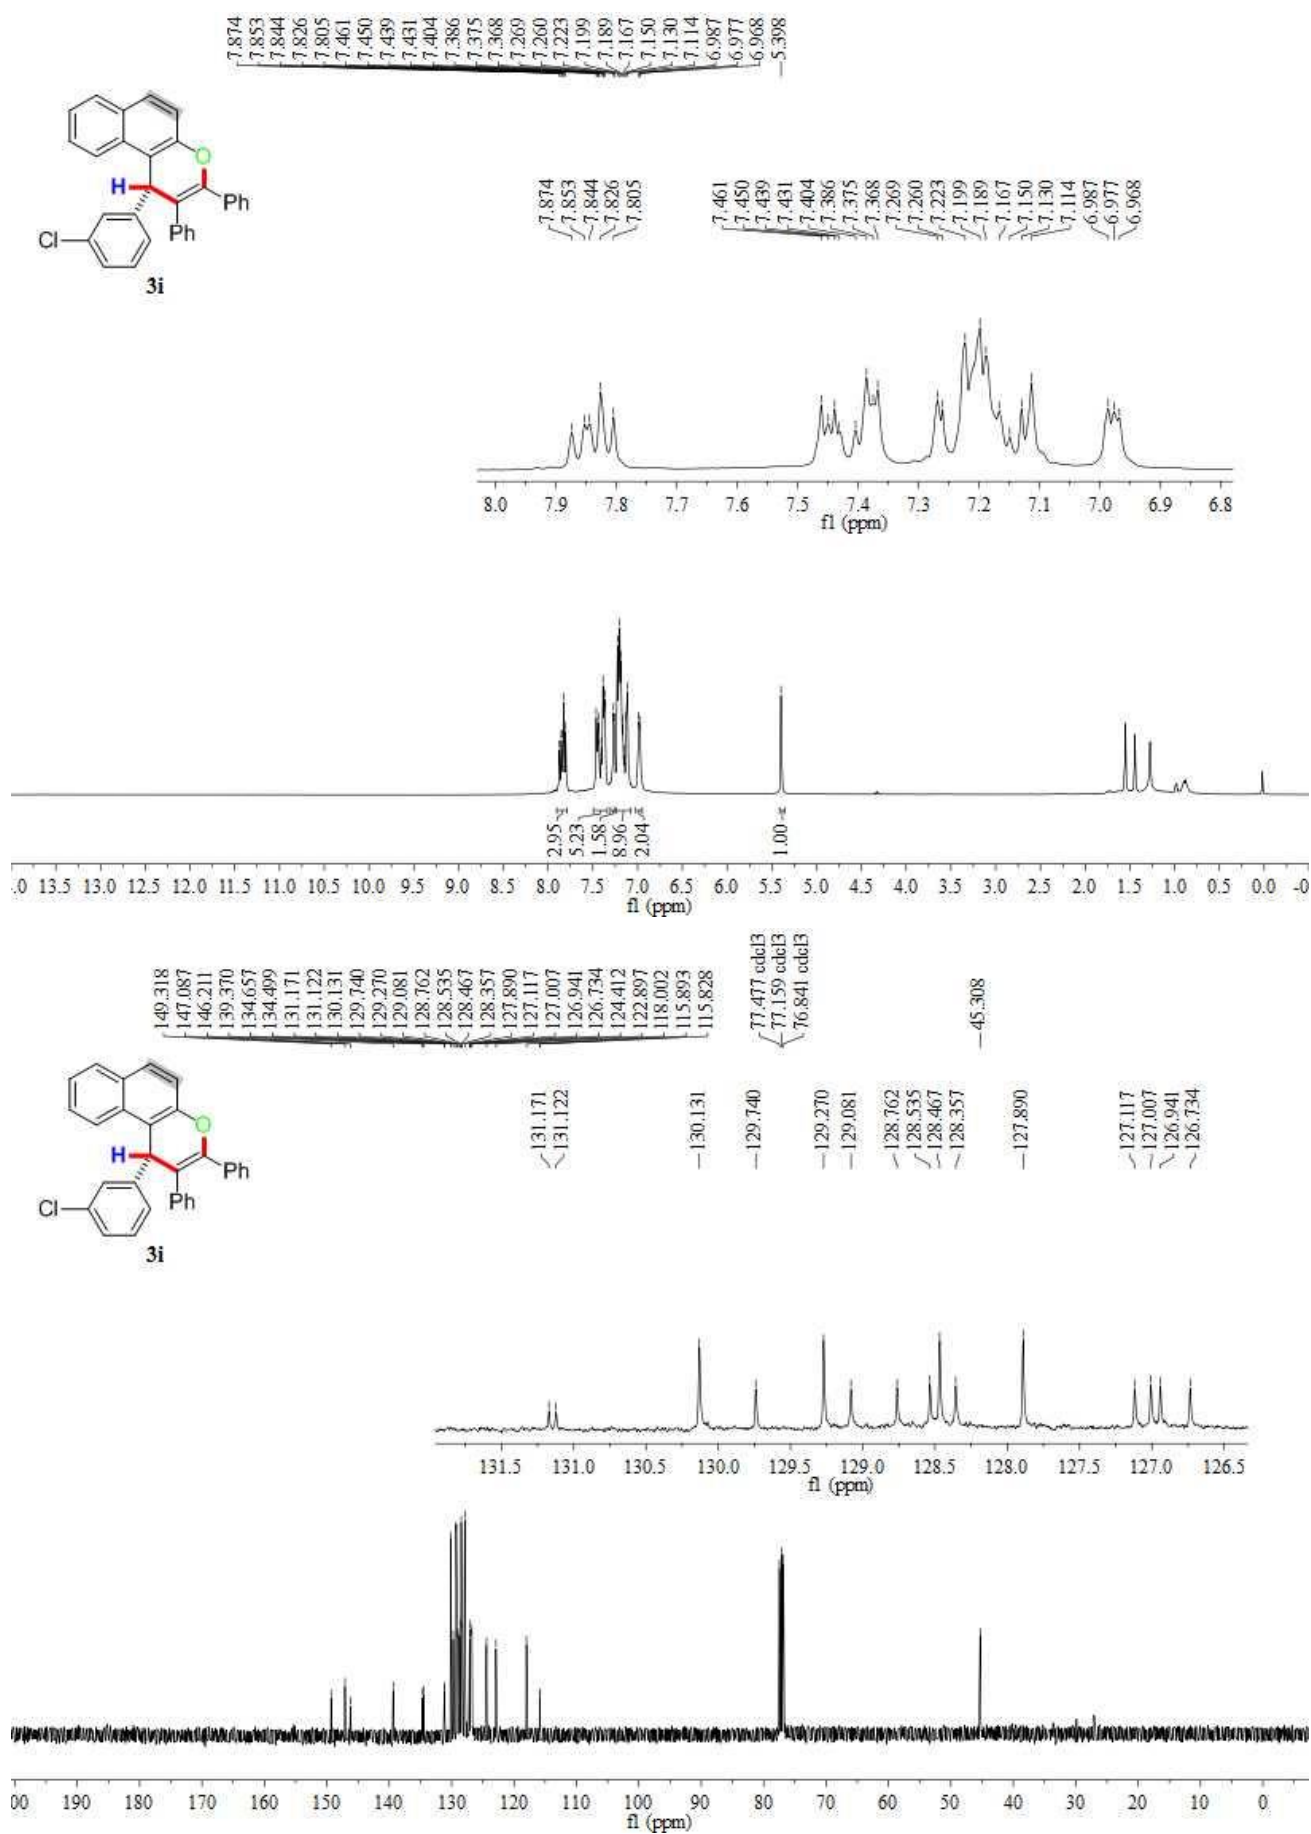

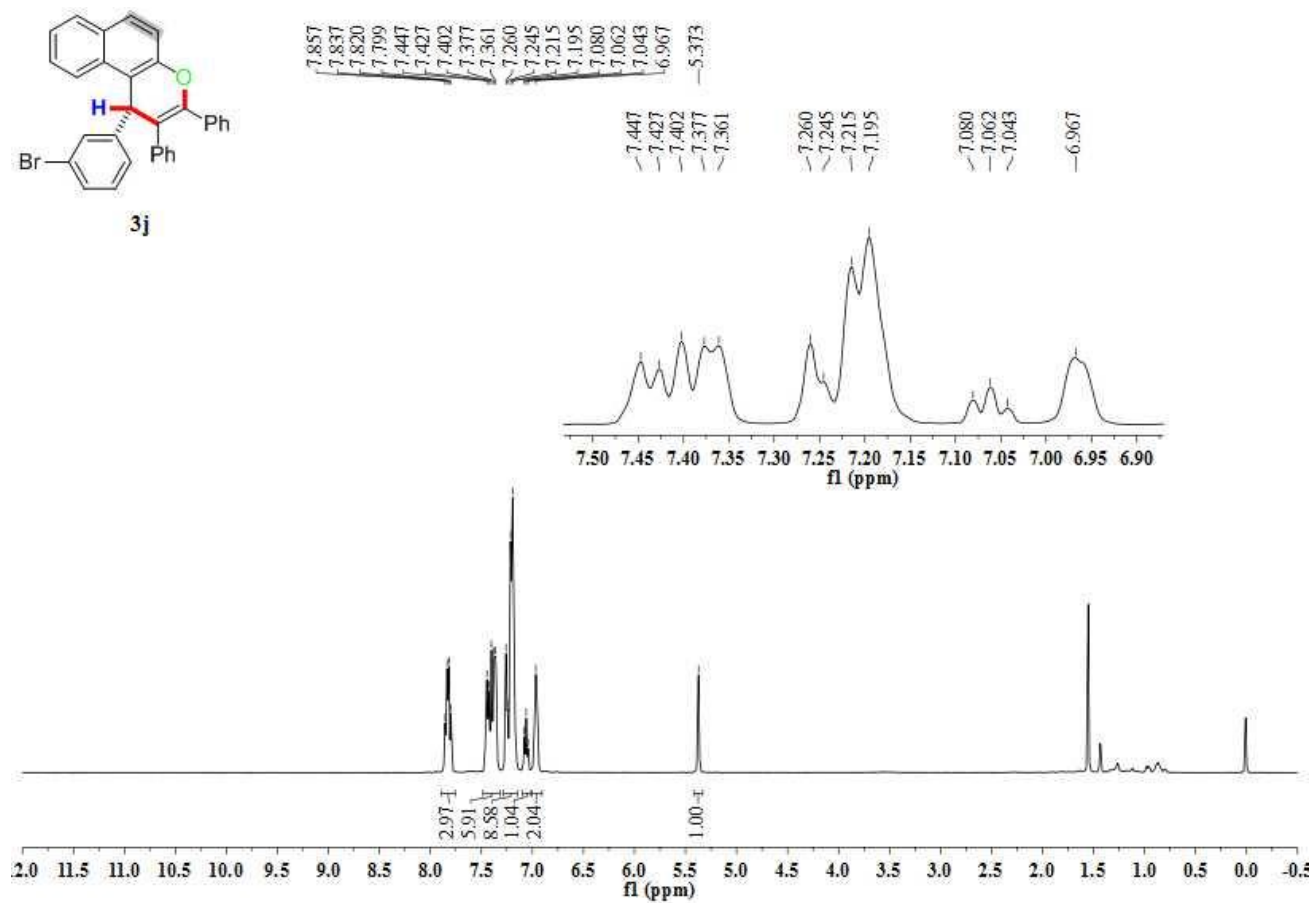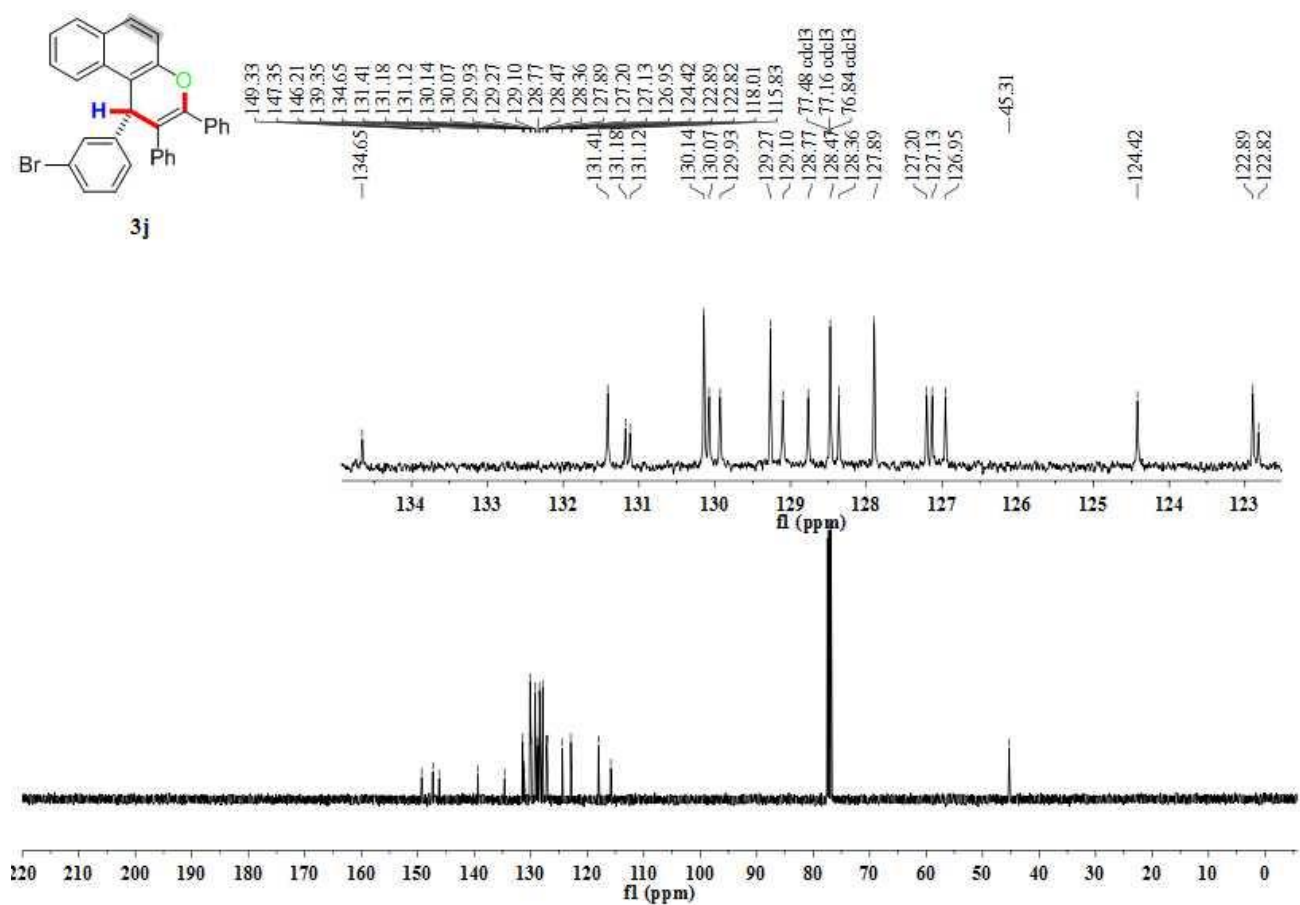

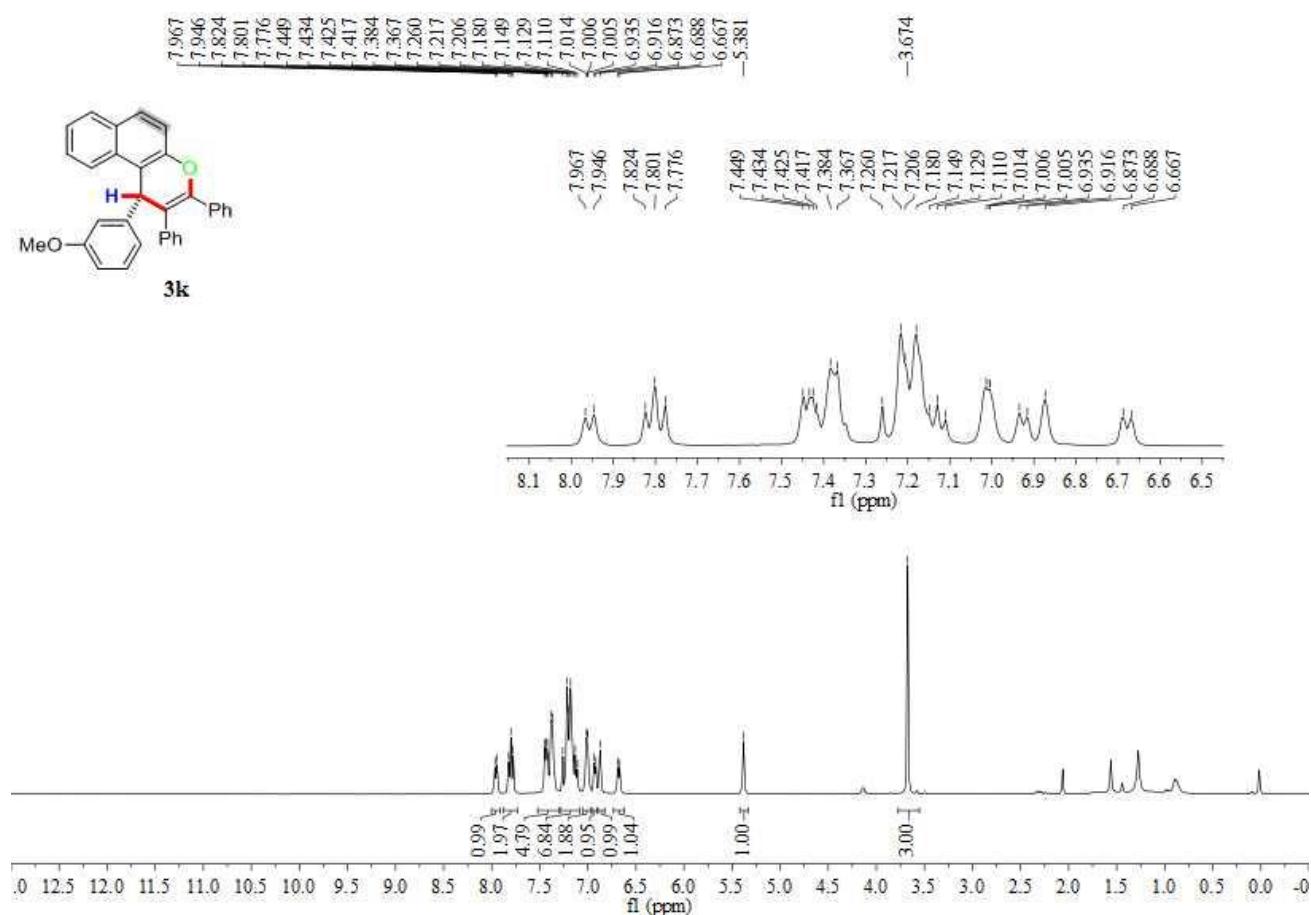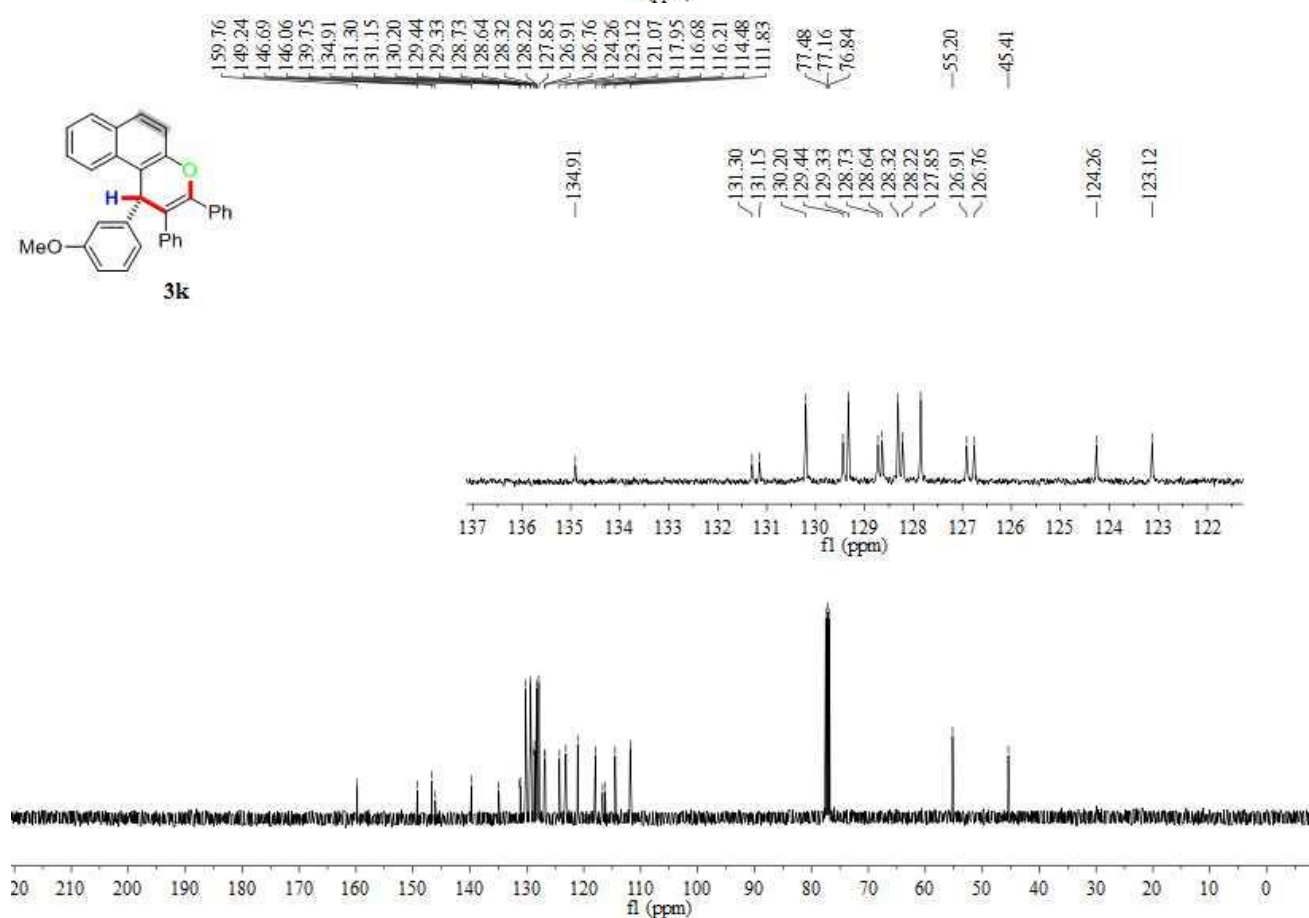



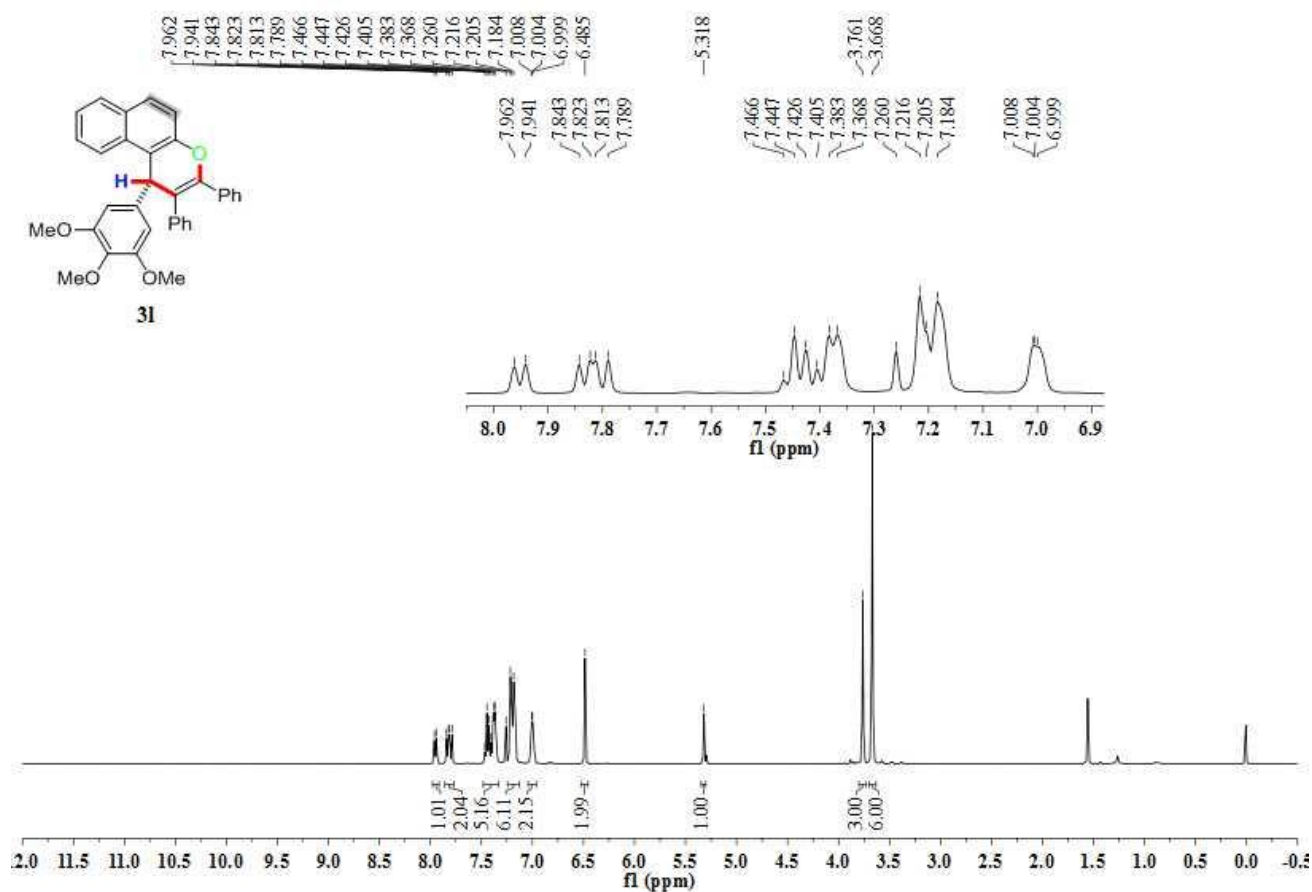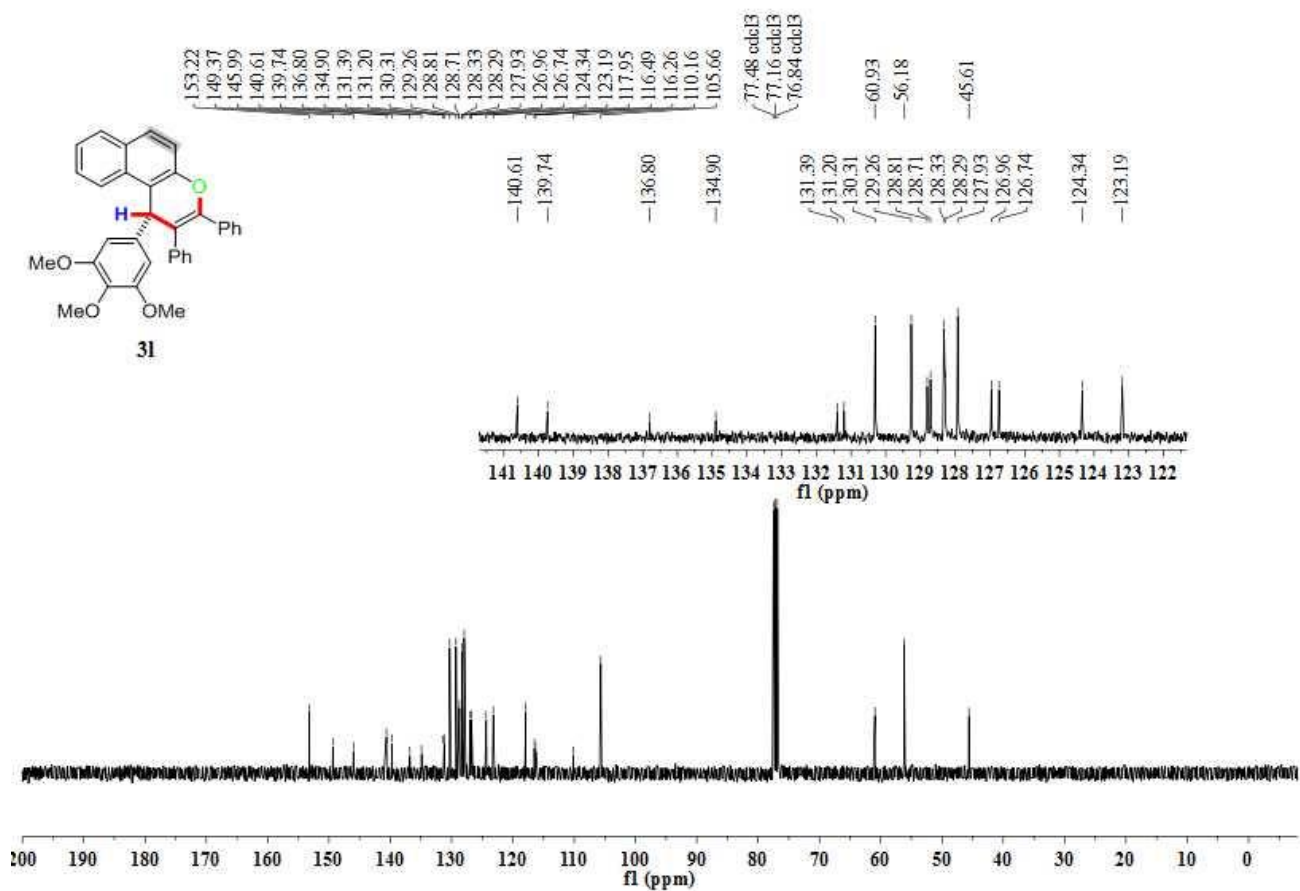

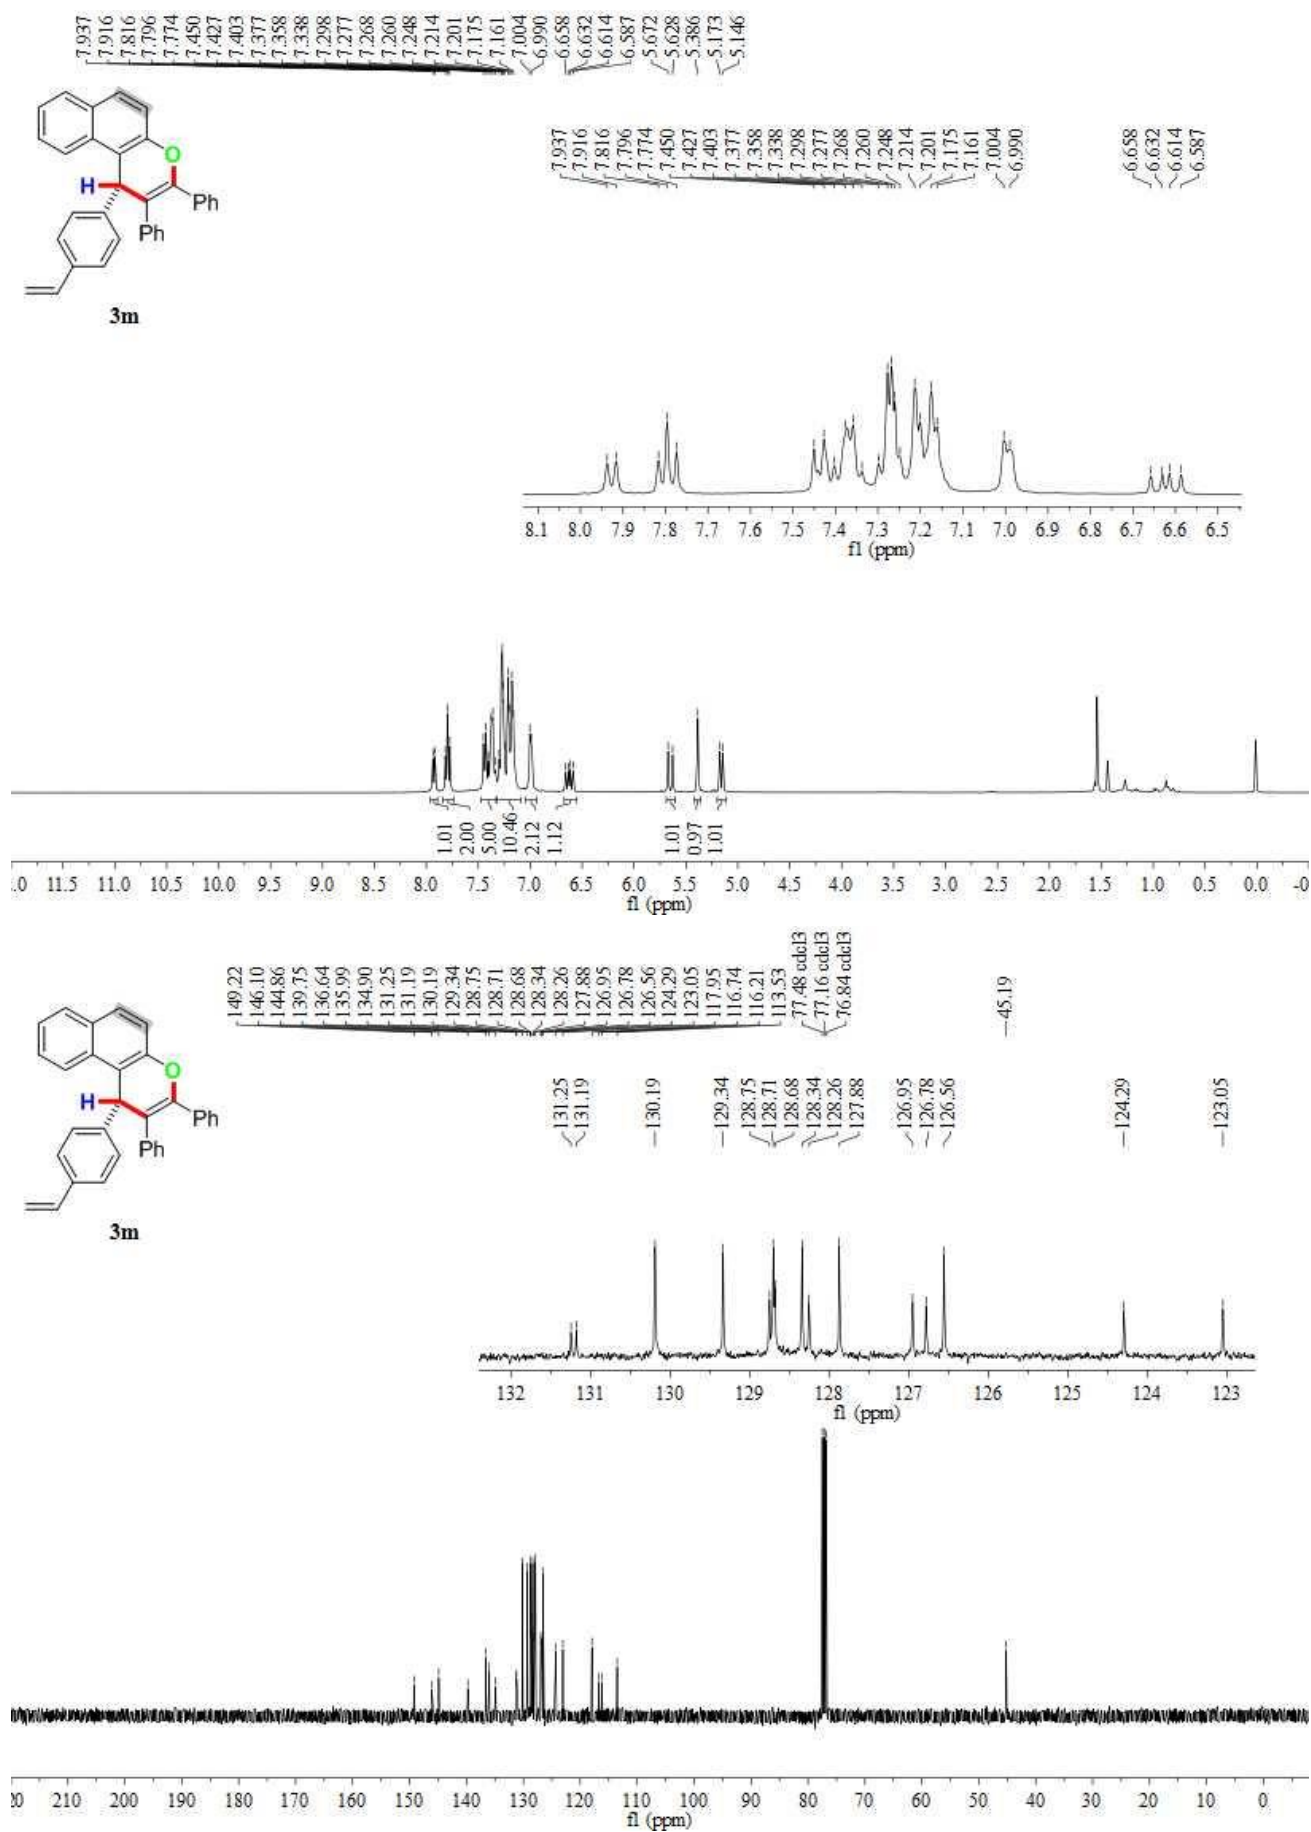

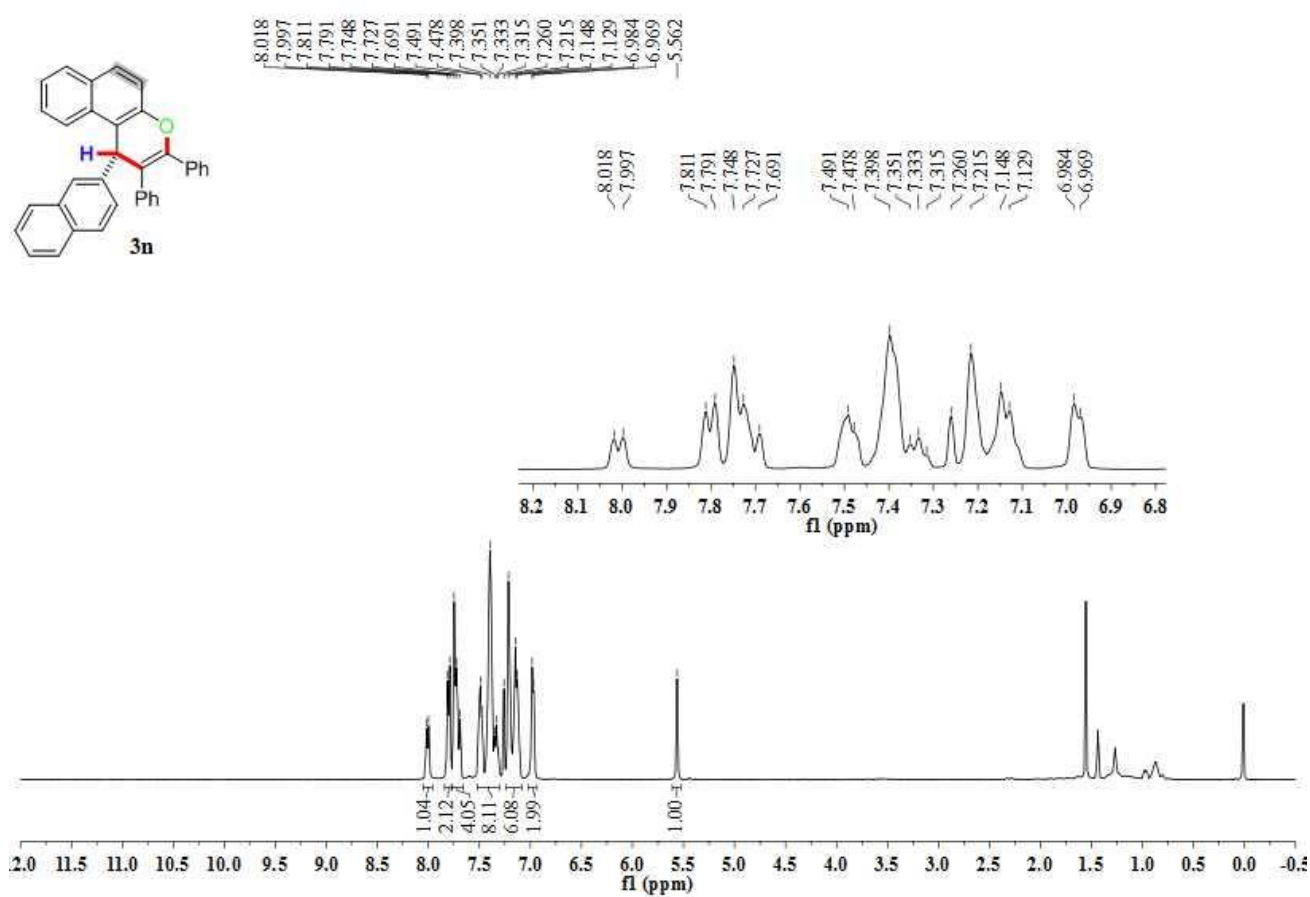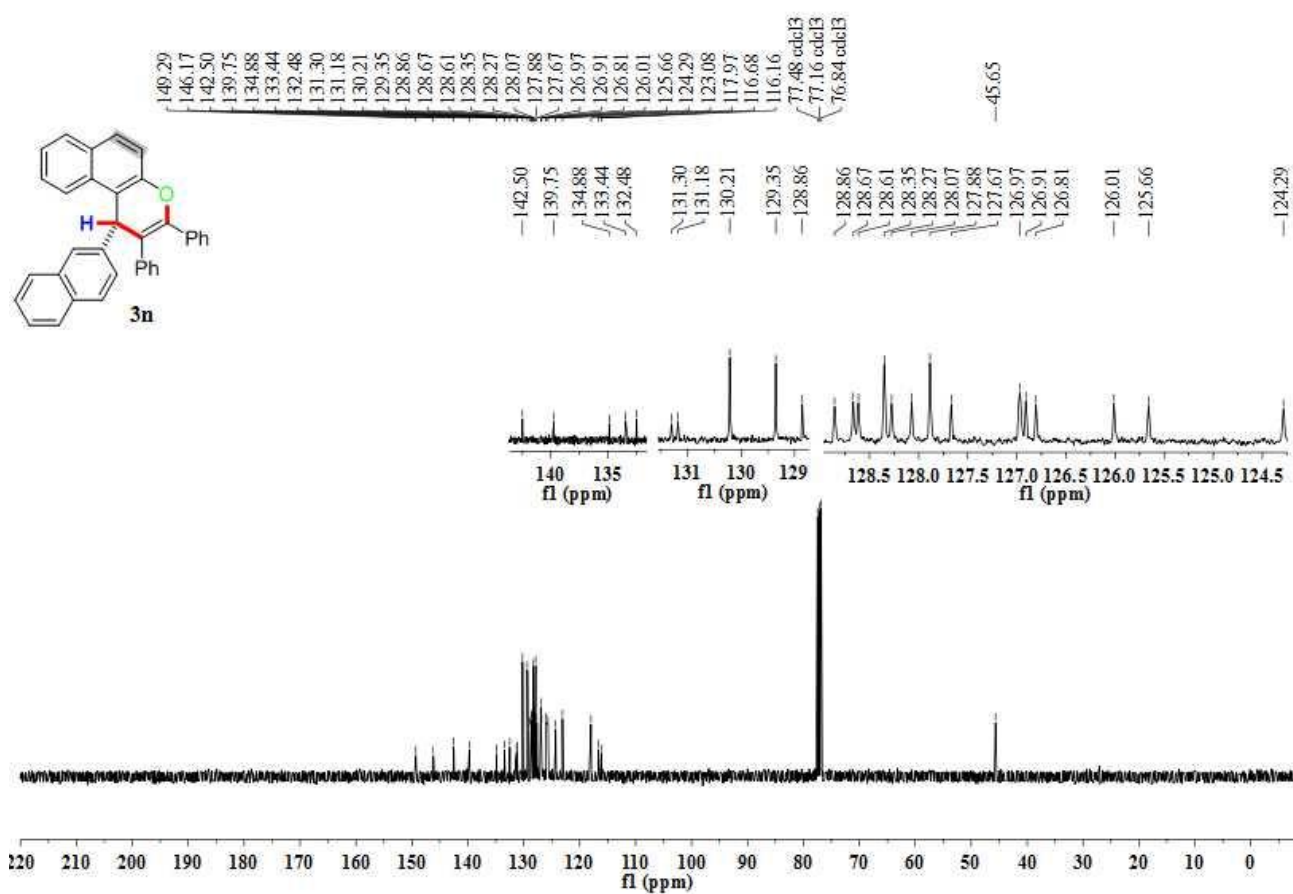

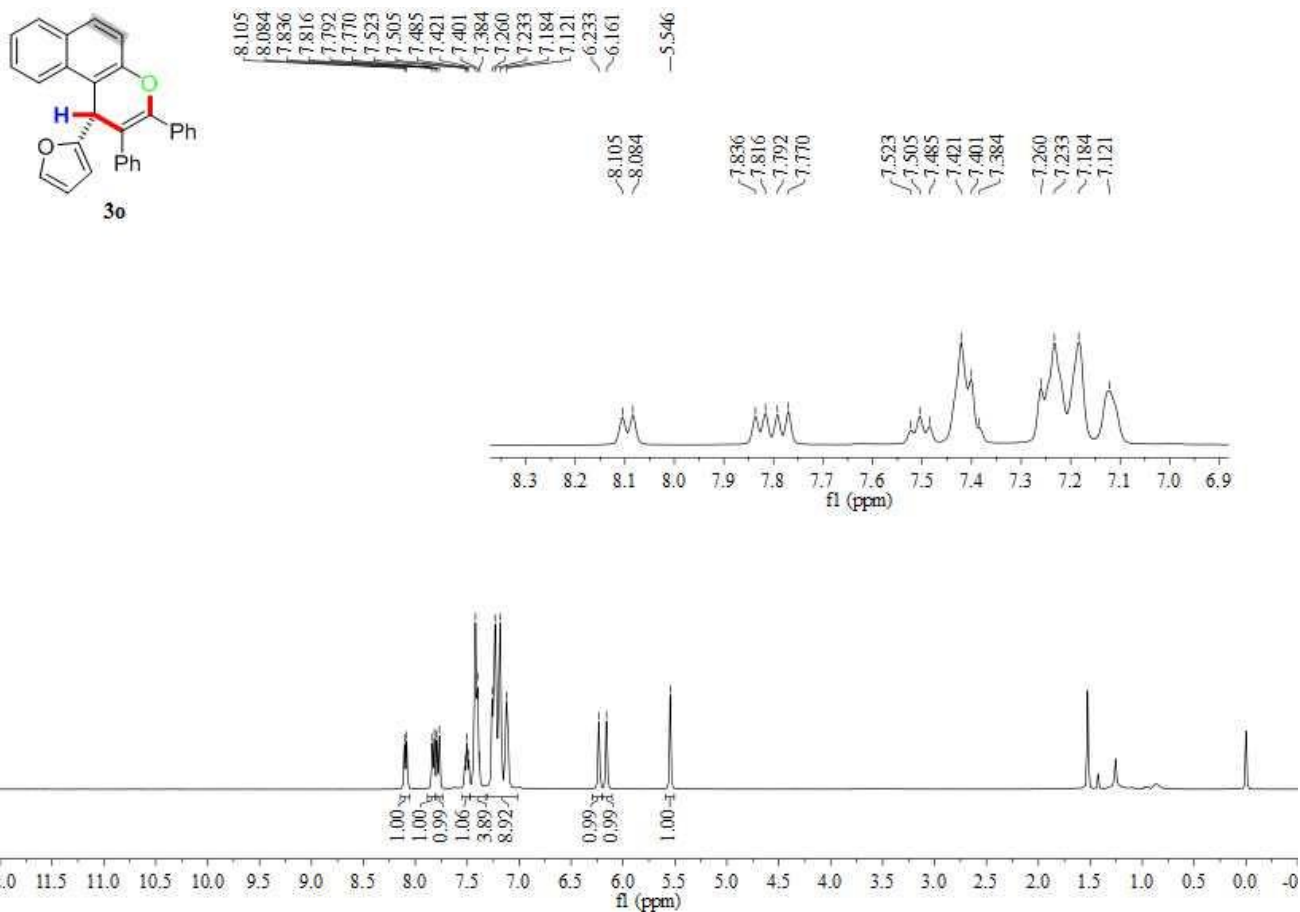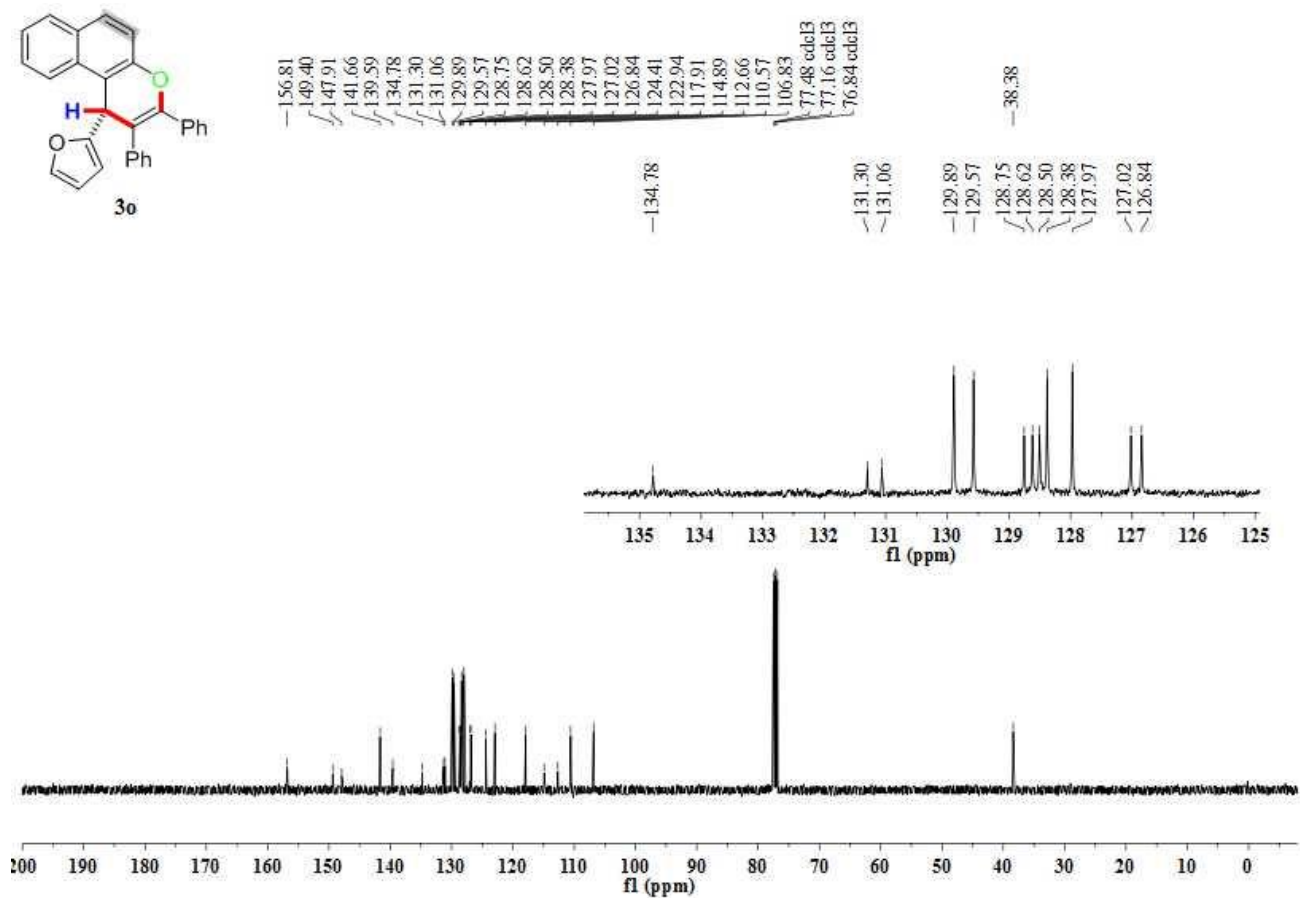

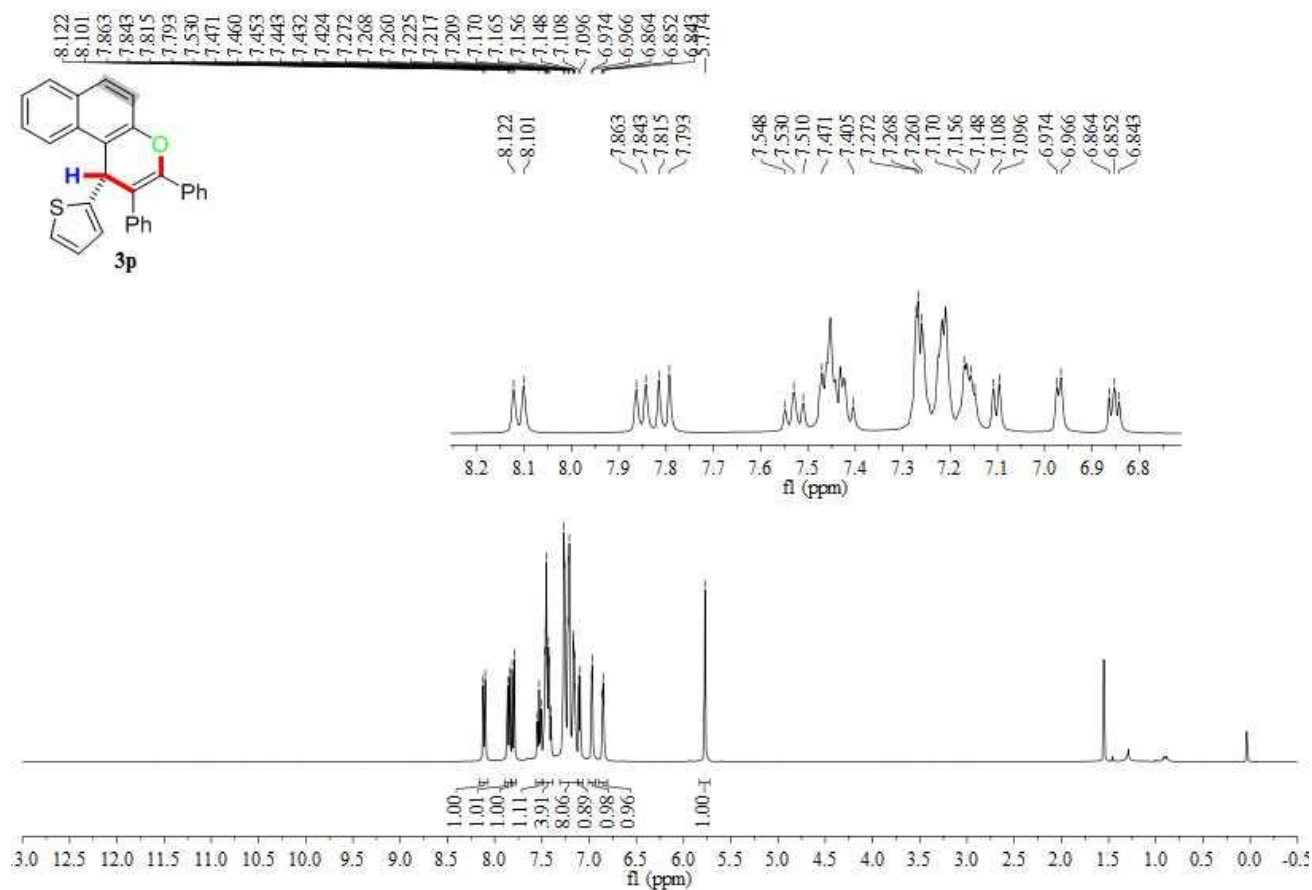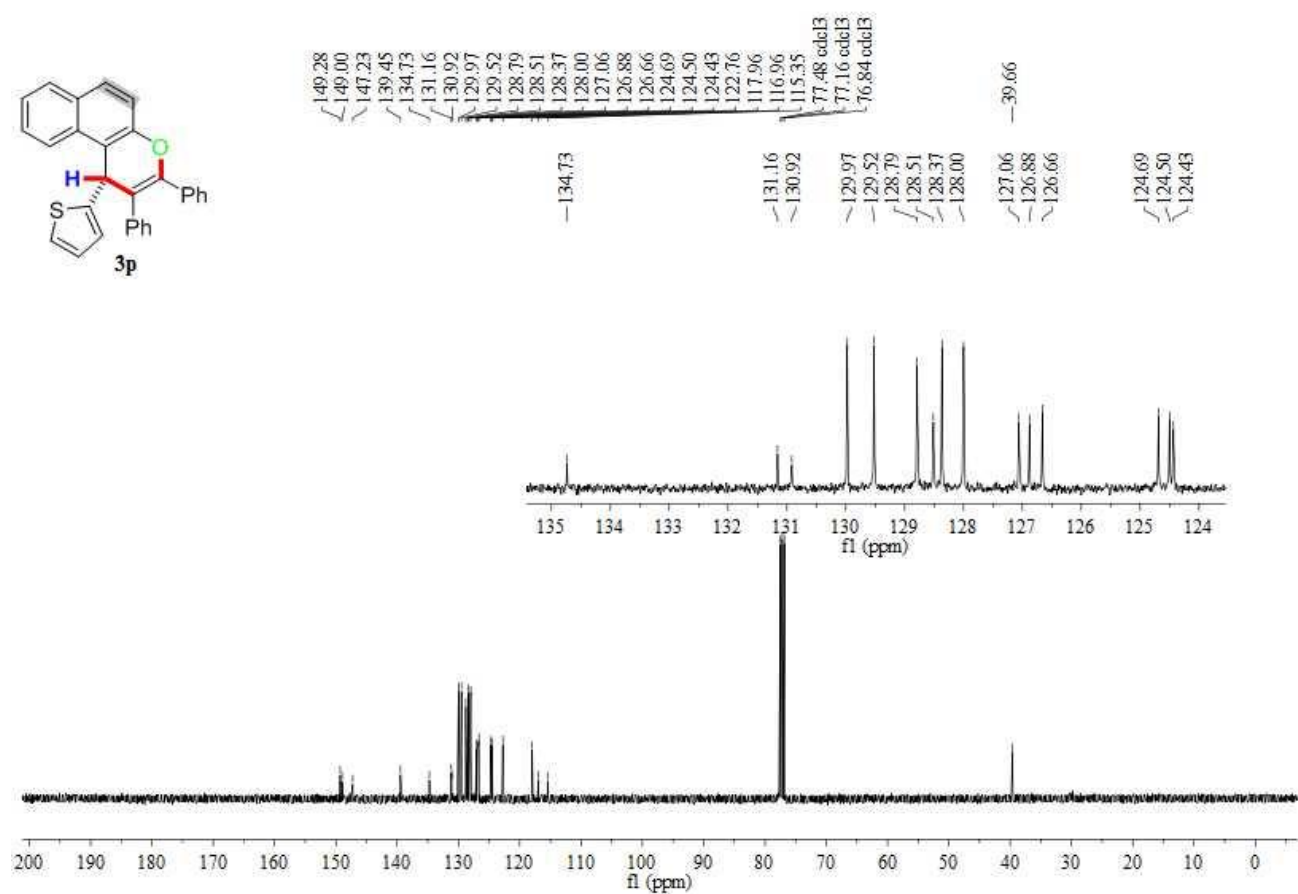



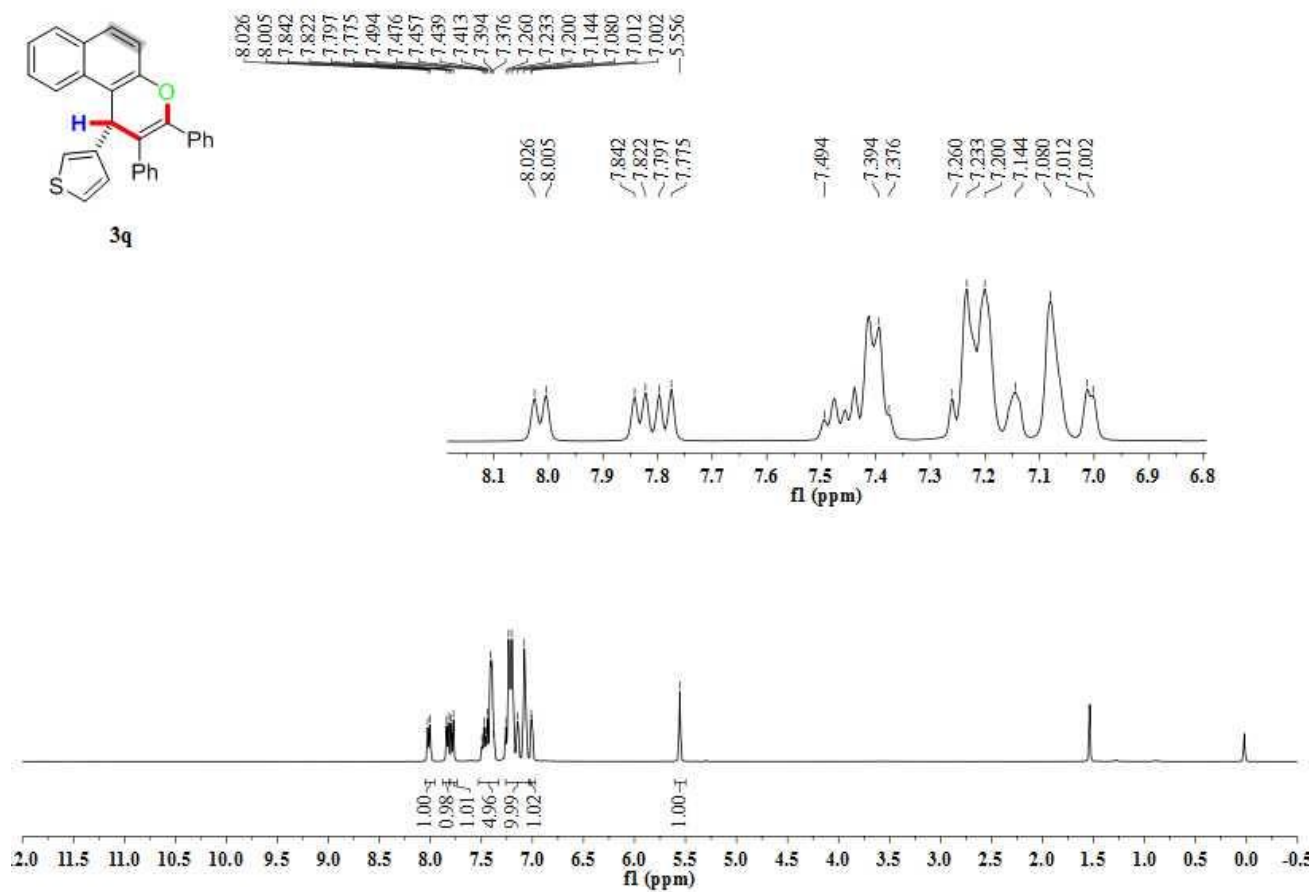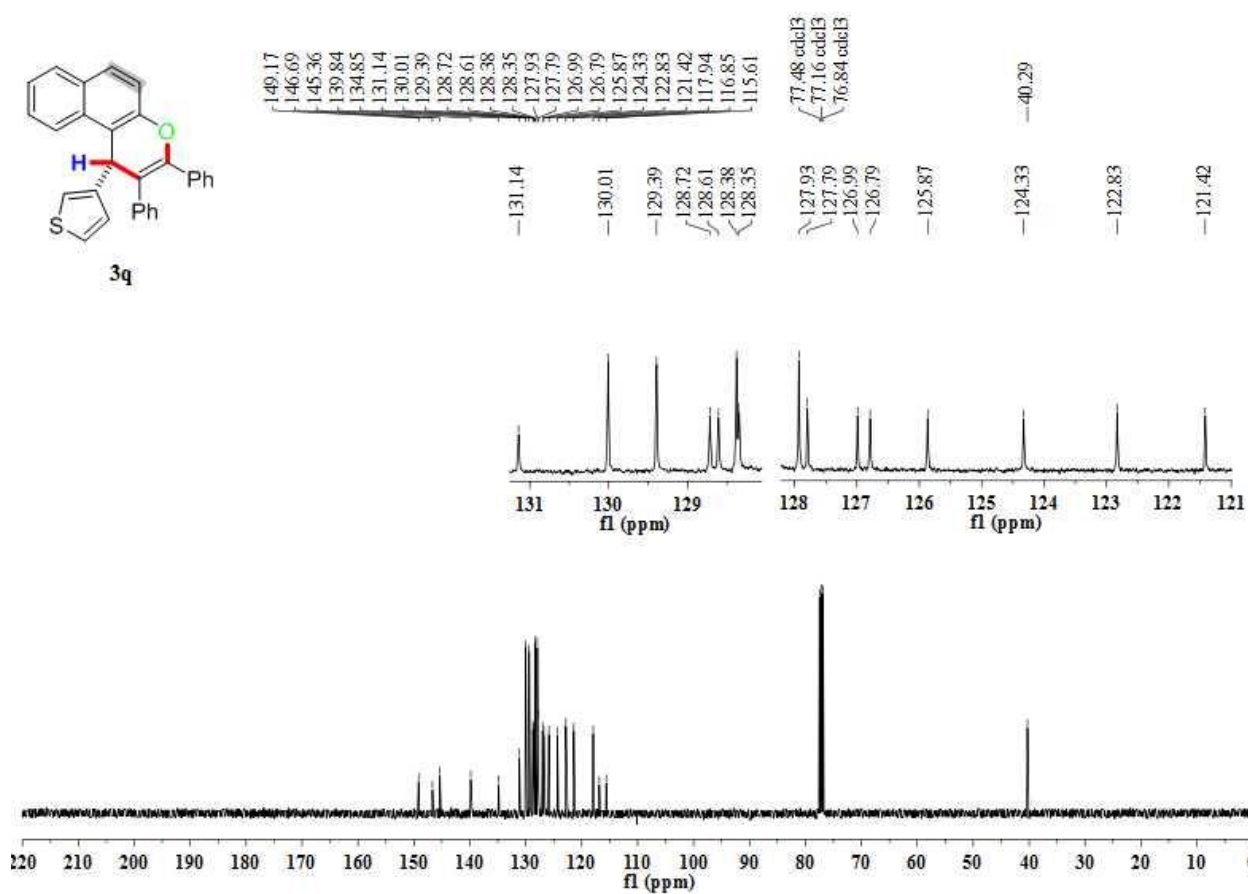

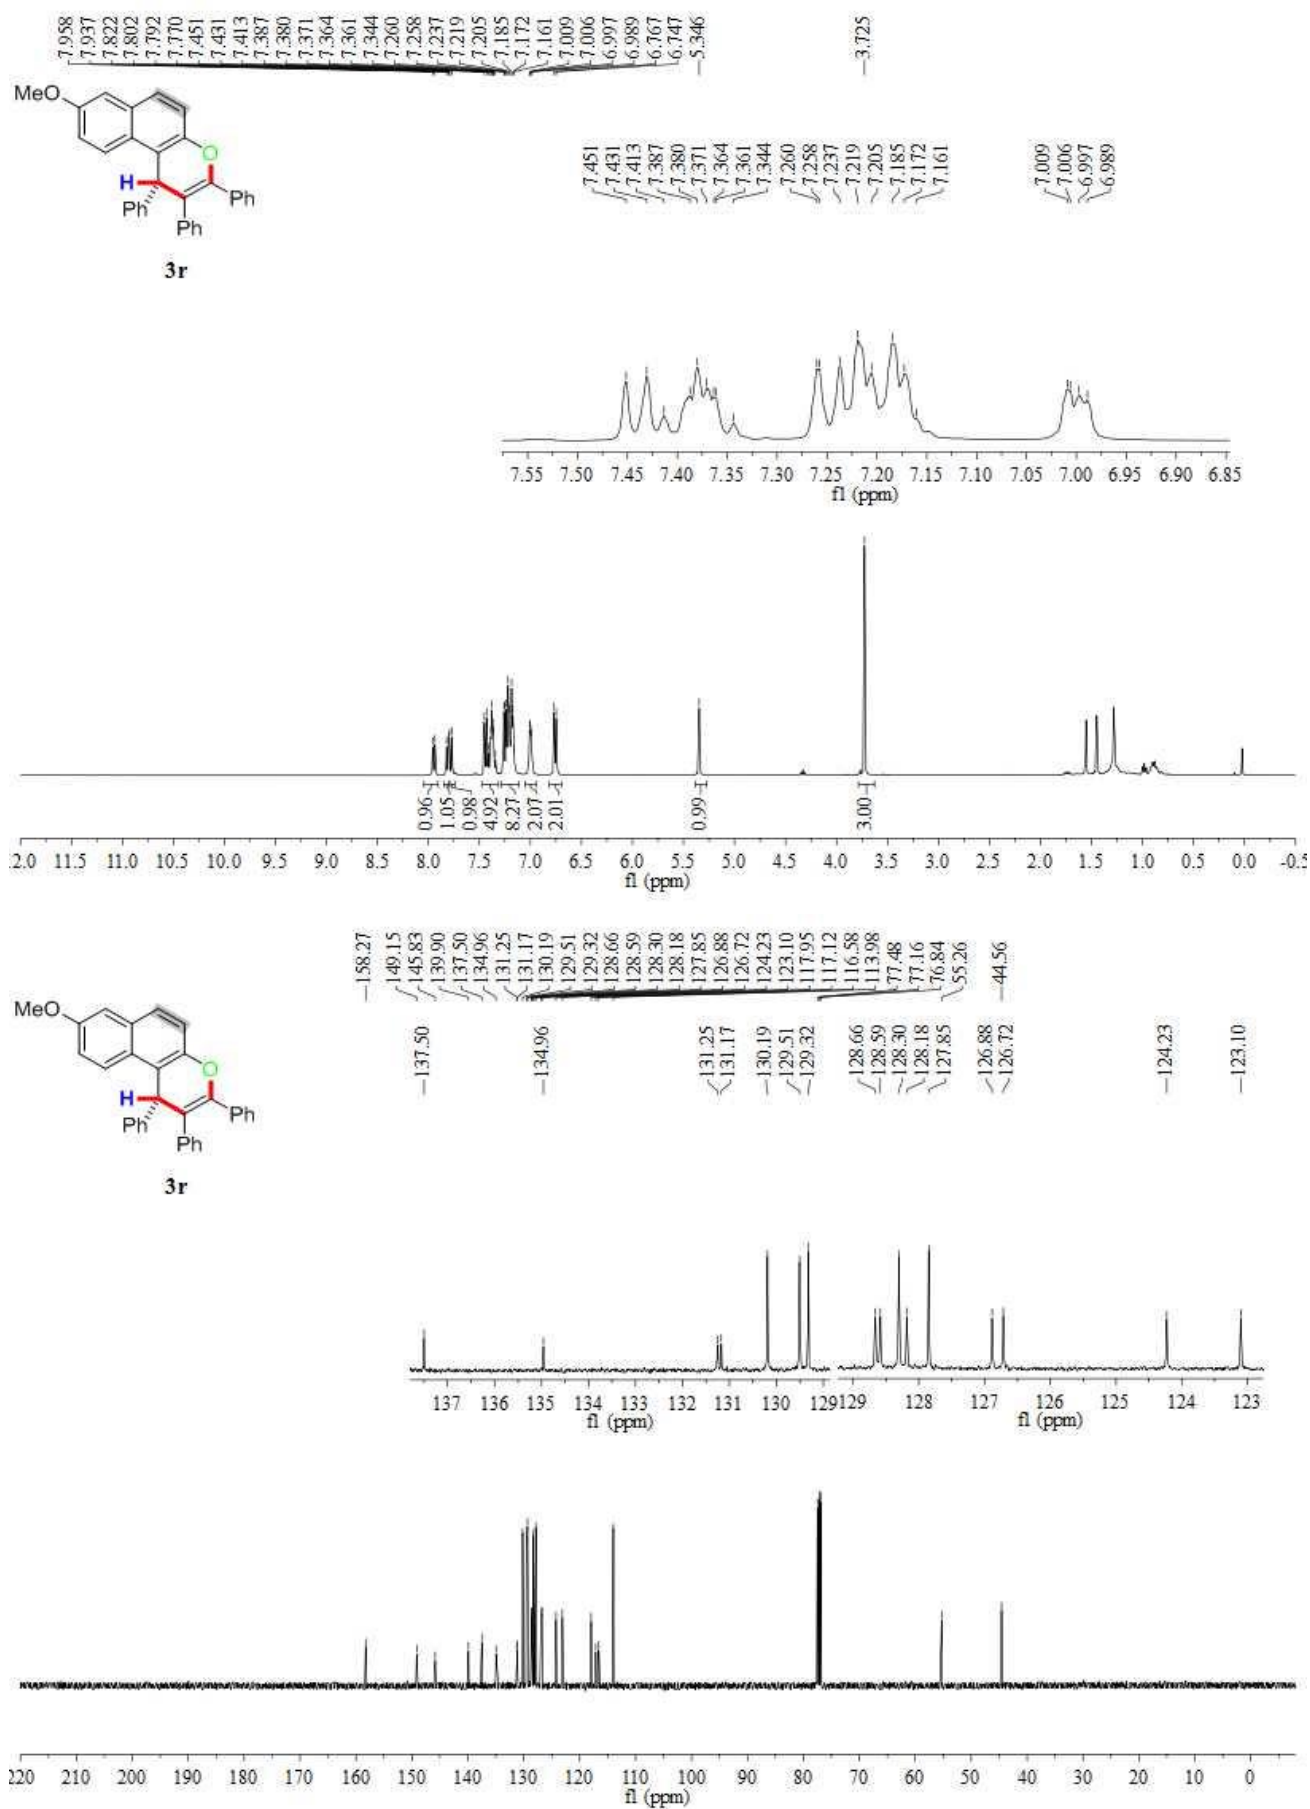





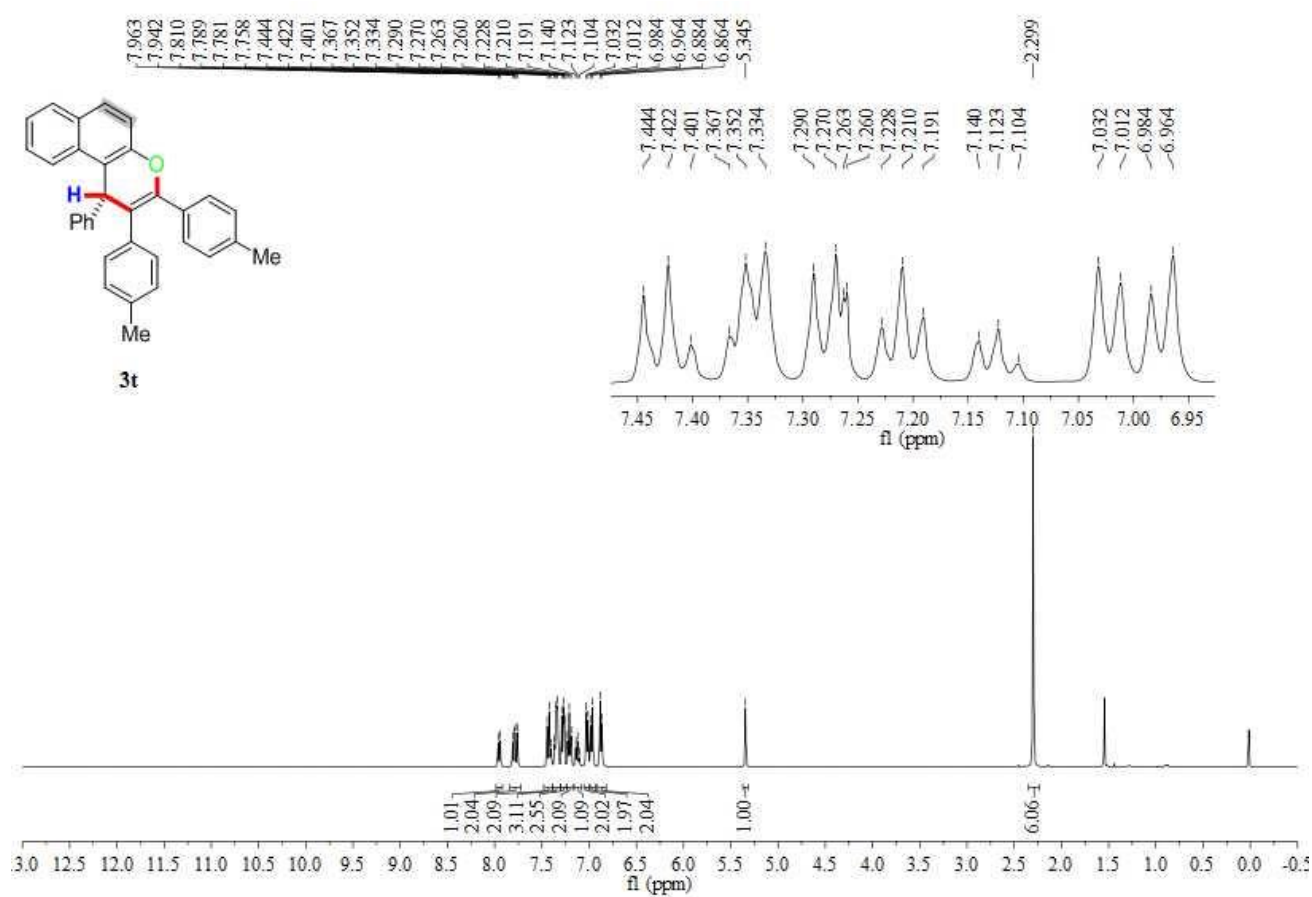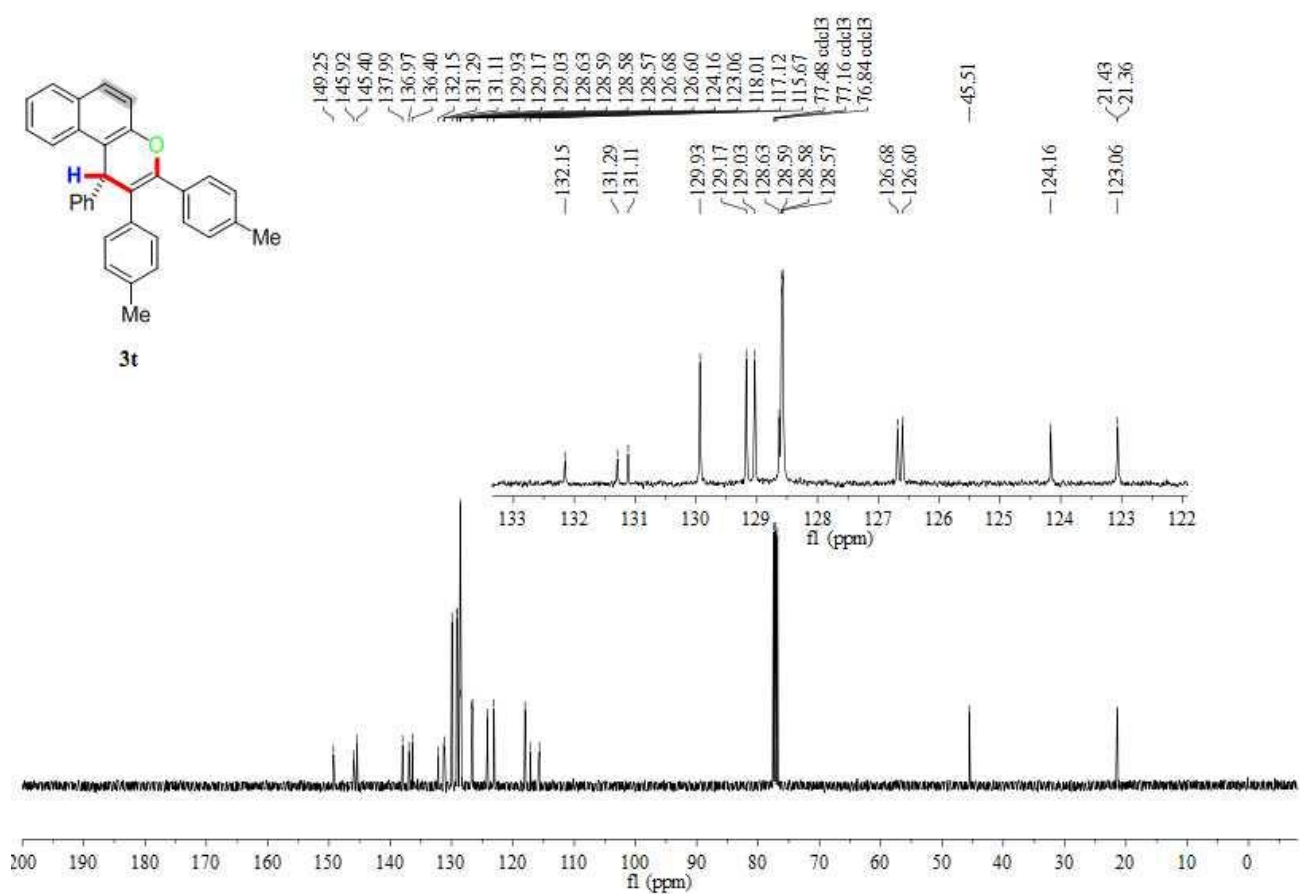

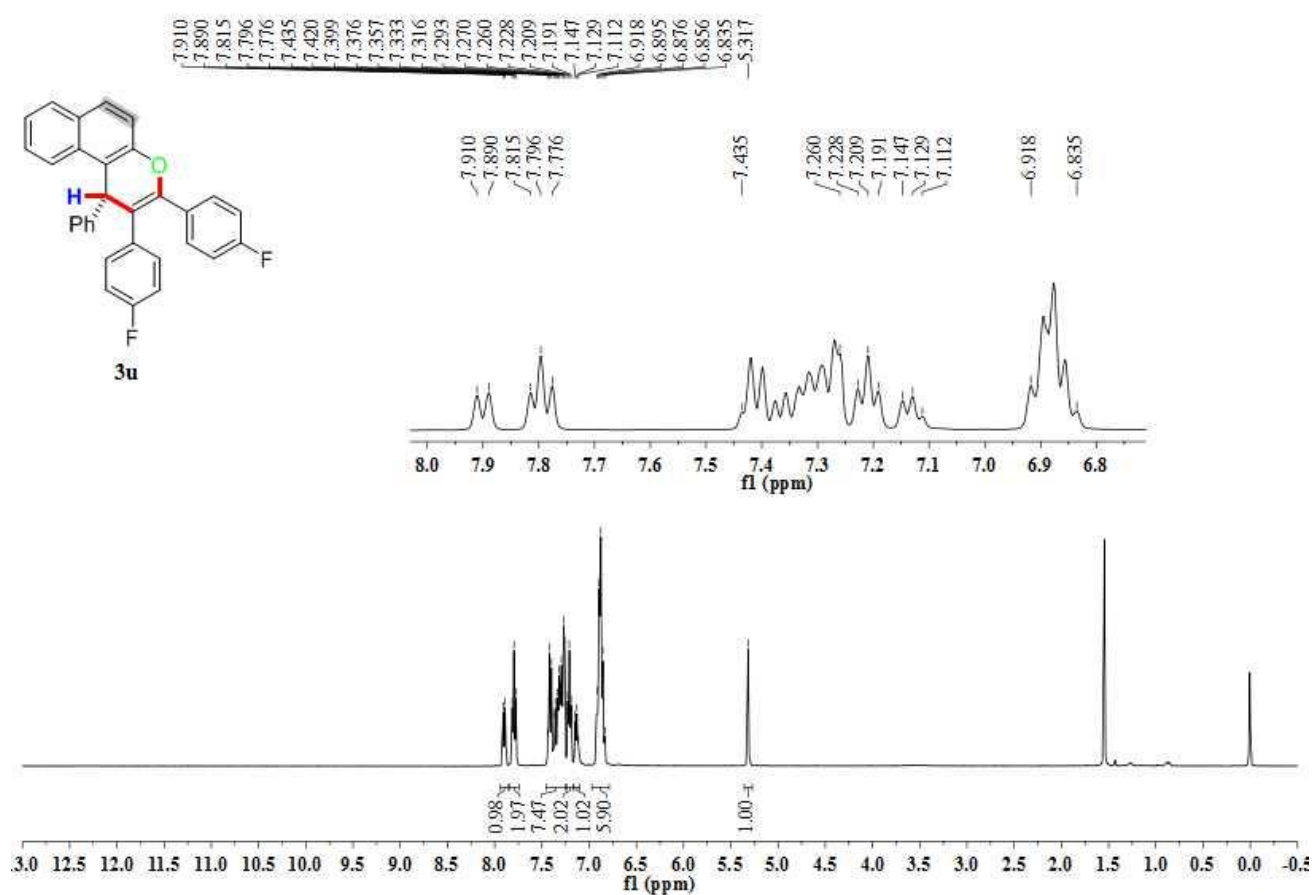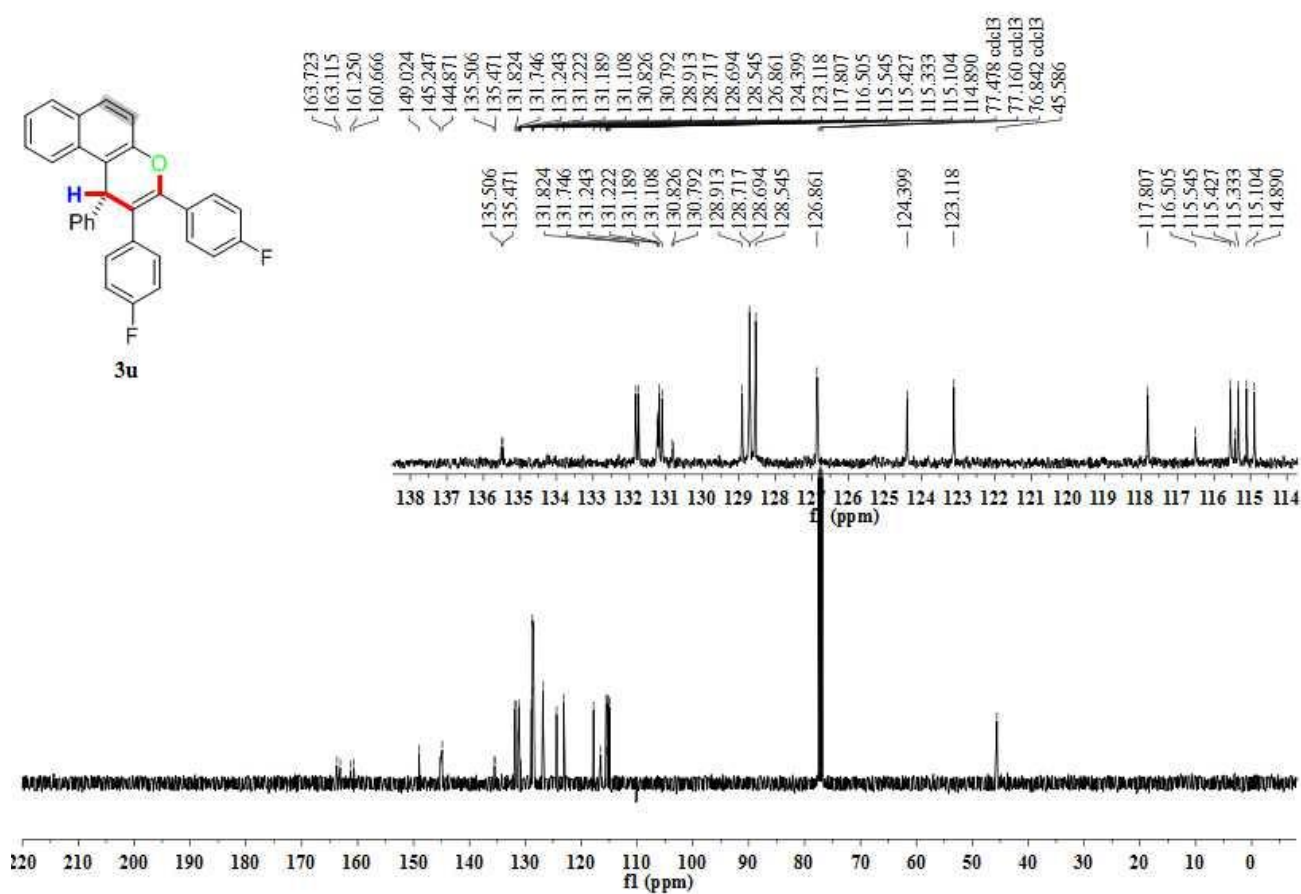

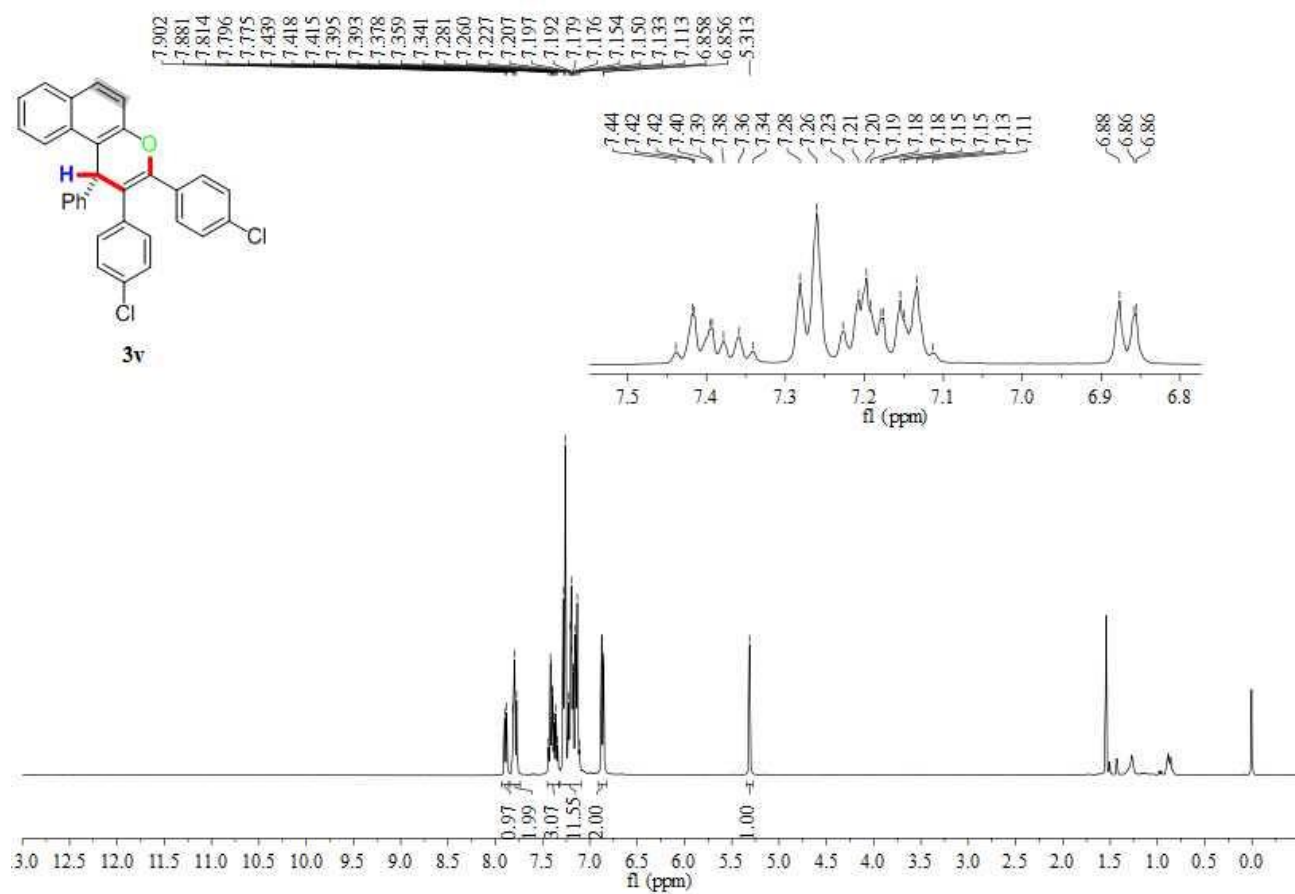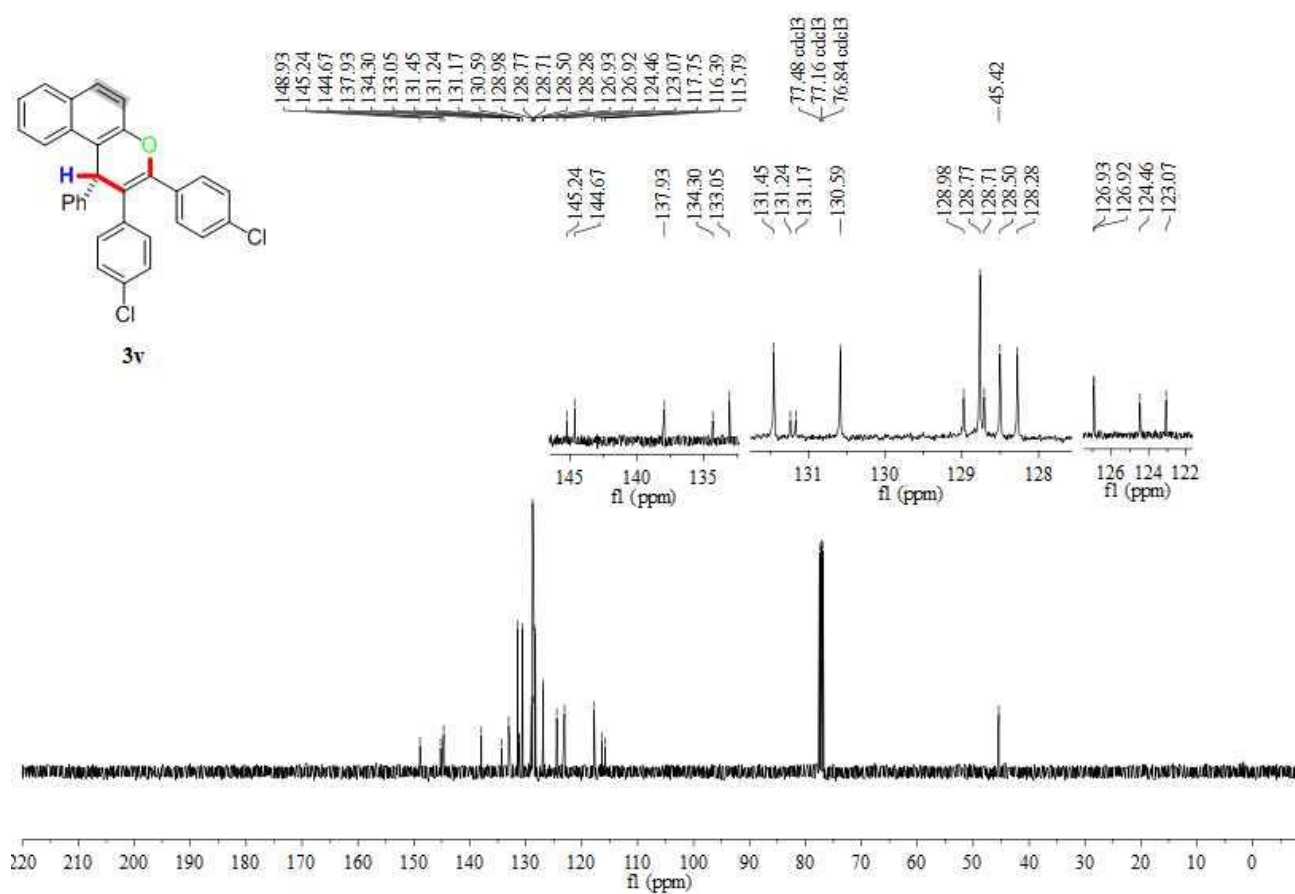

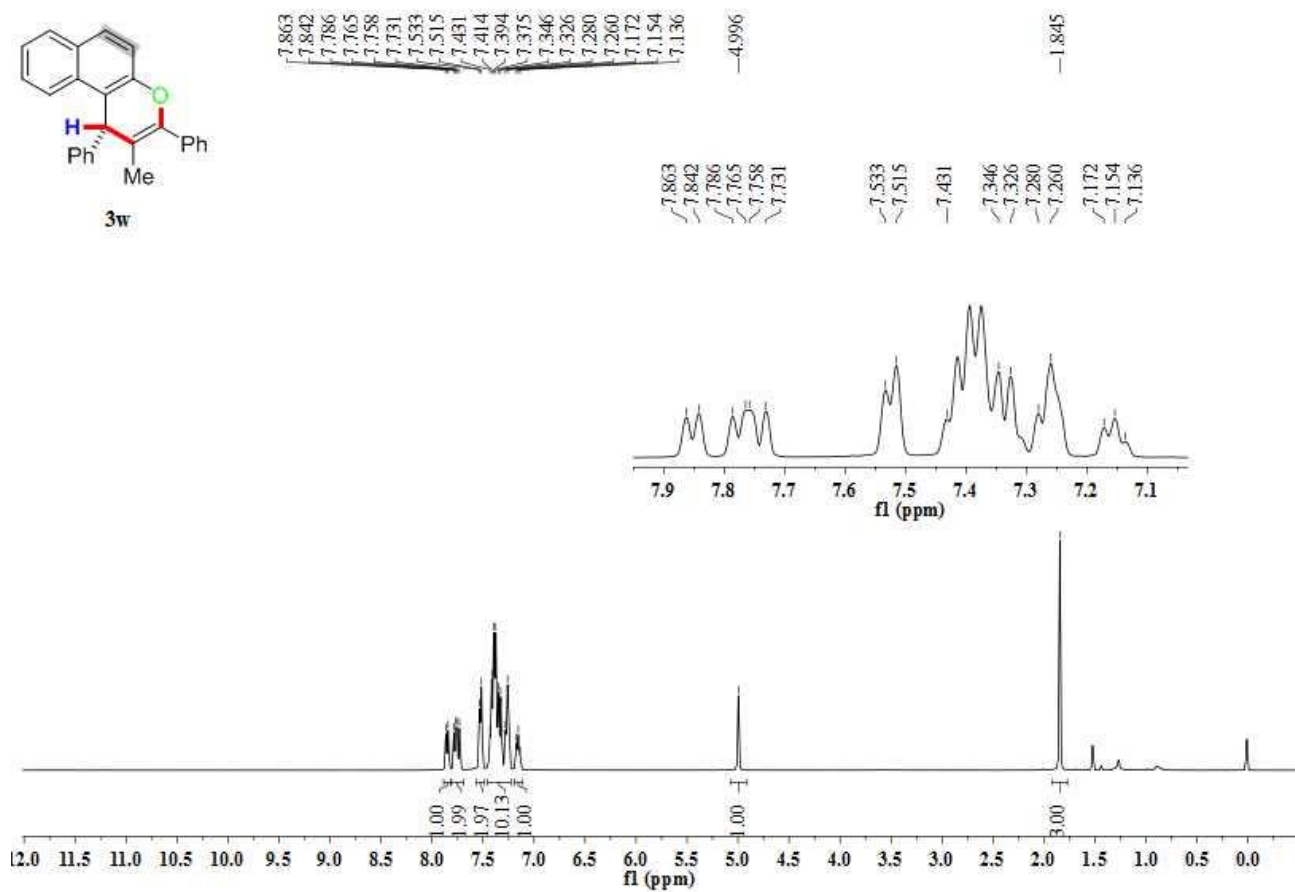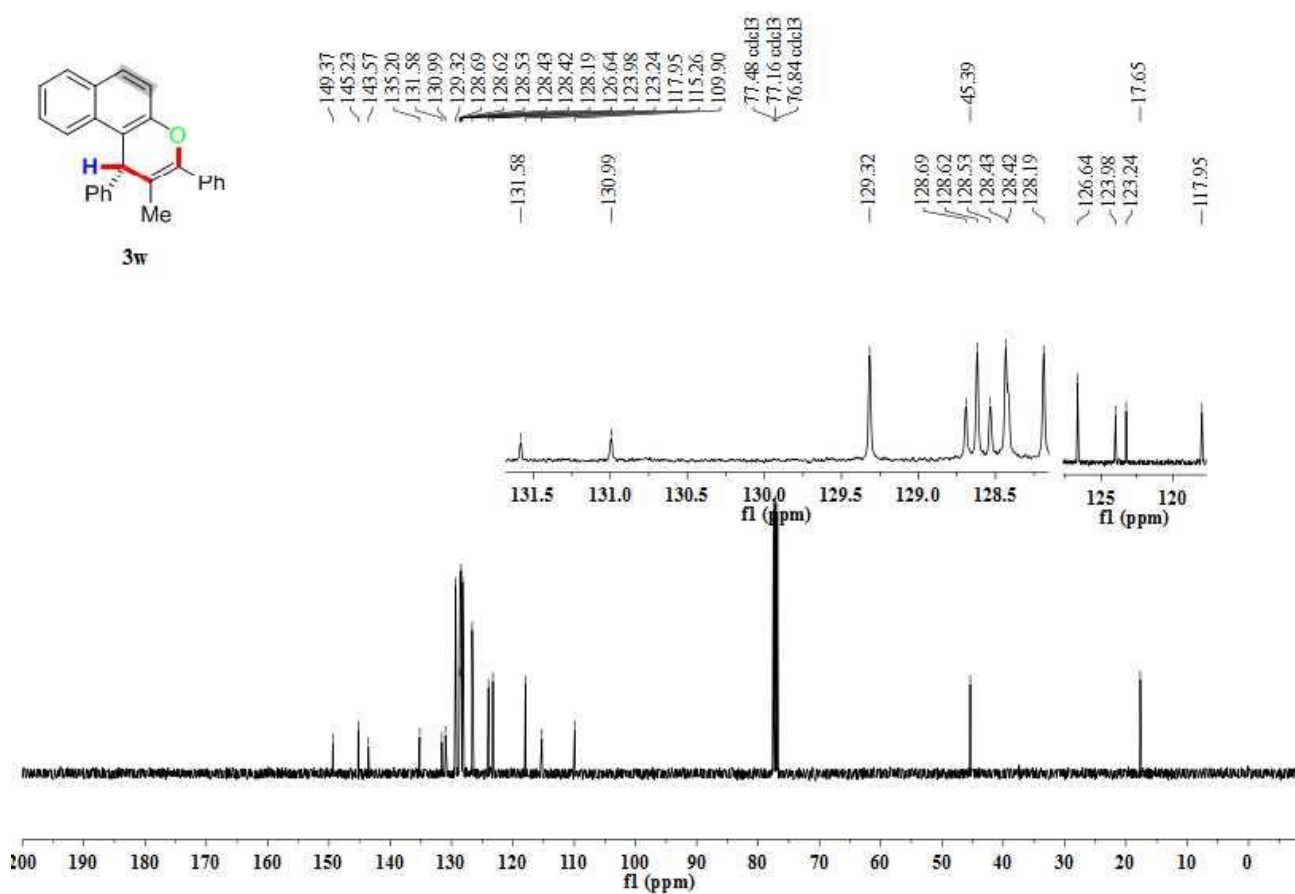

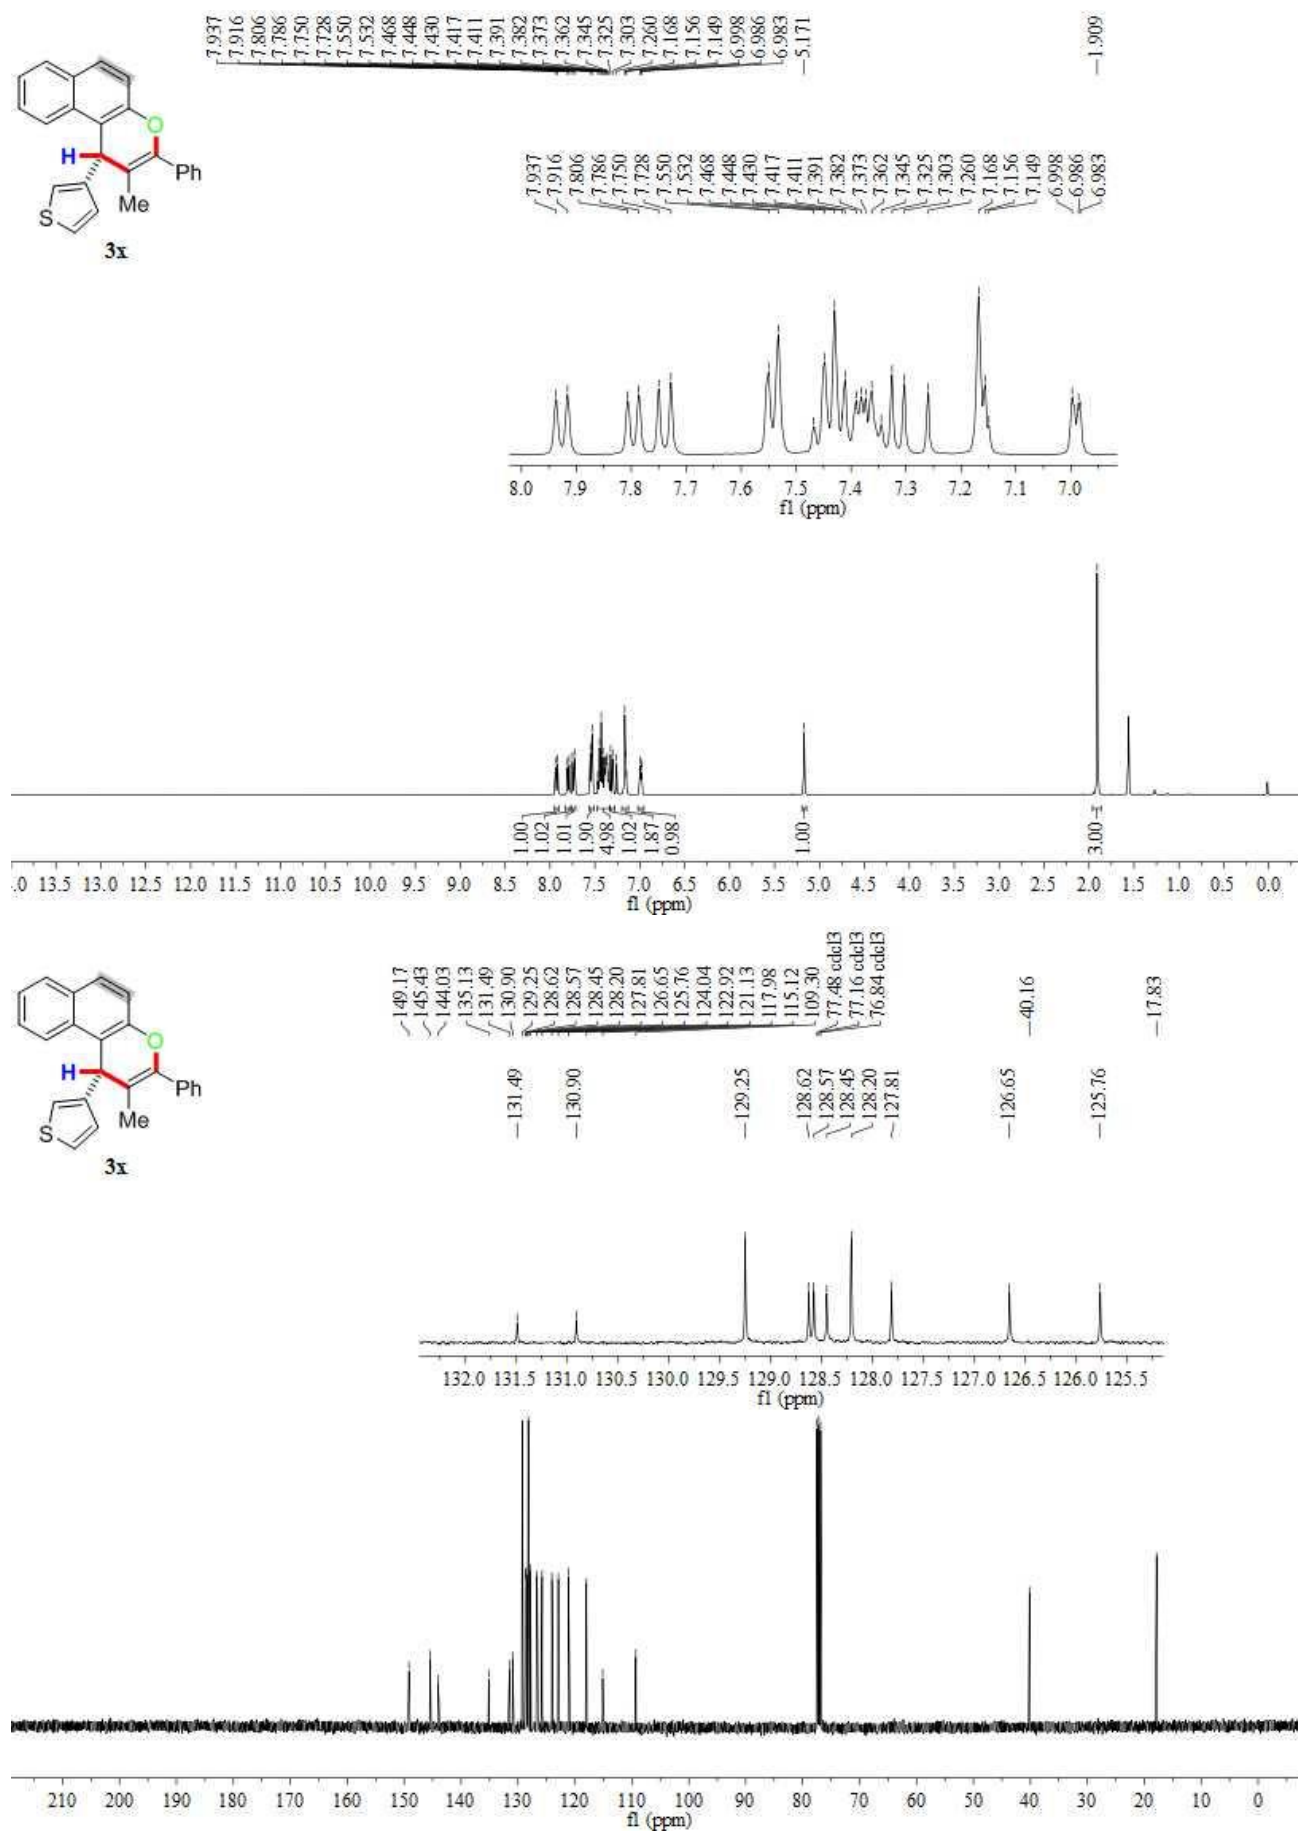



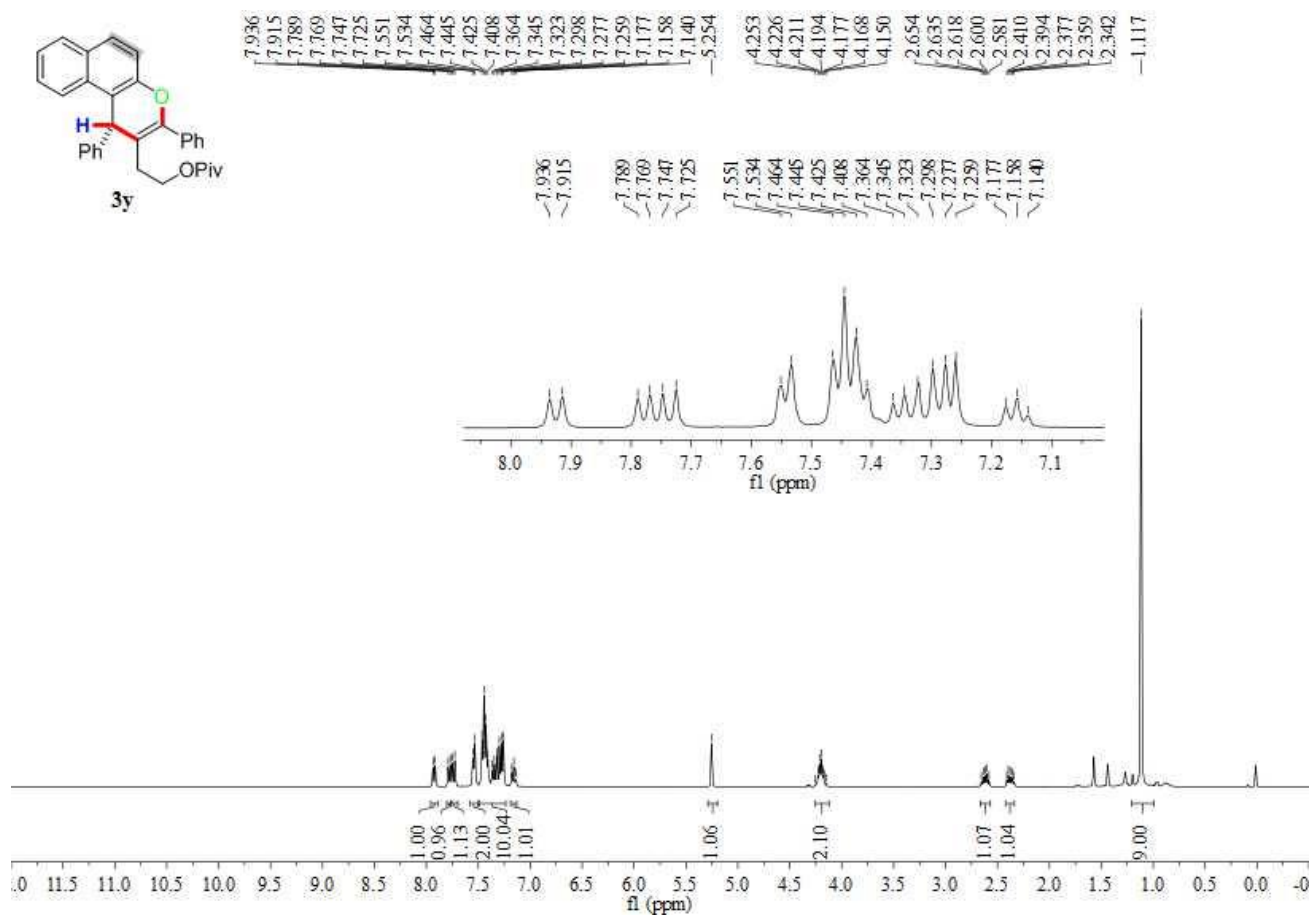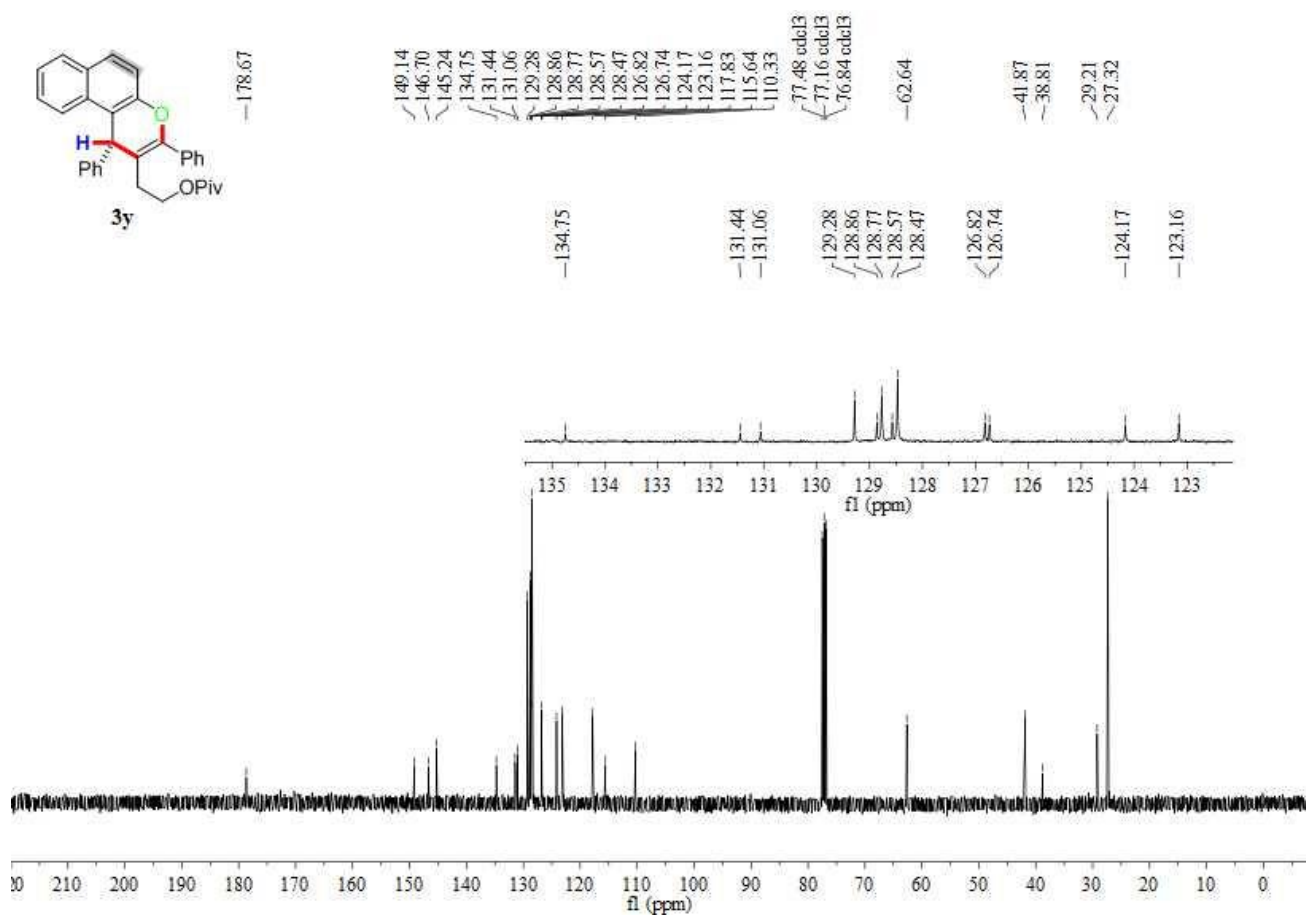

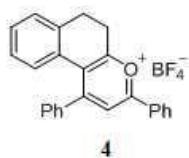

4

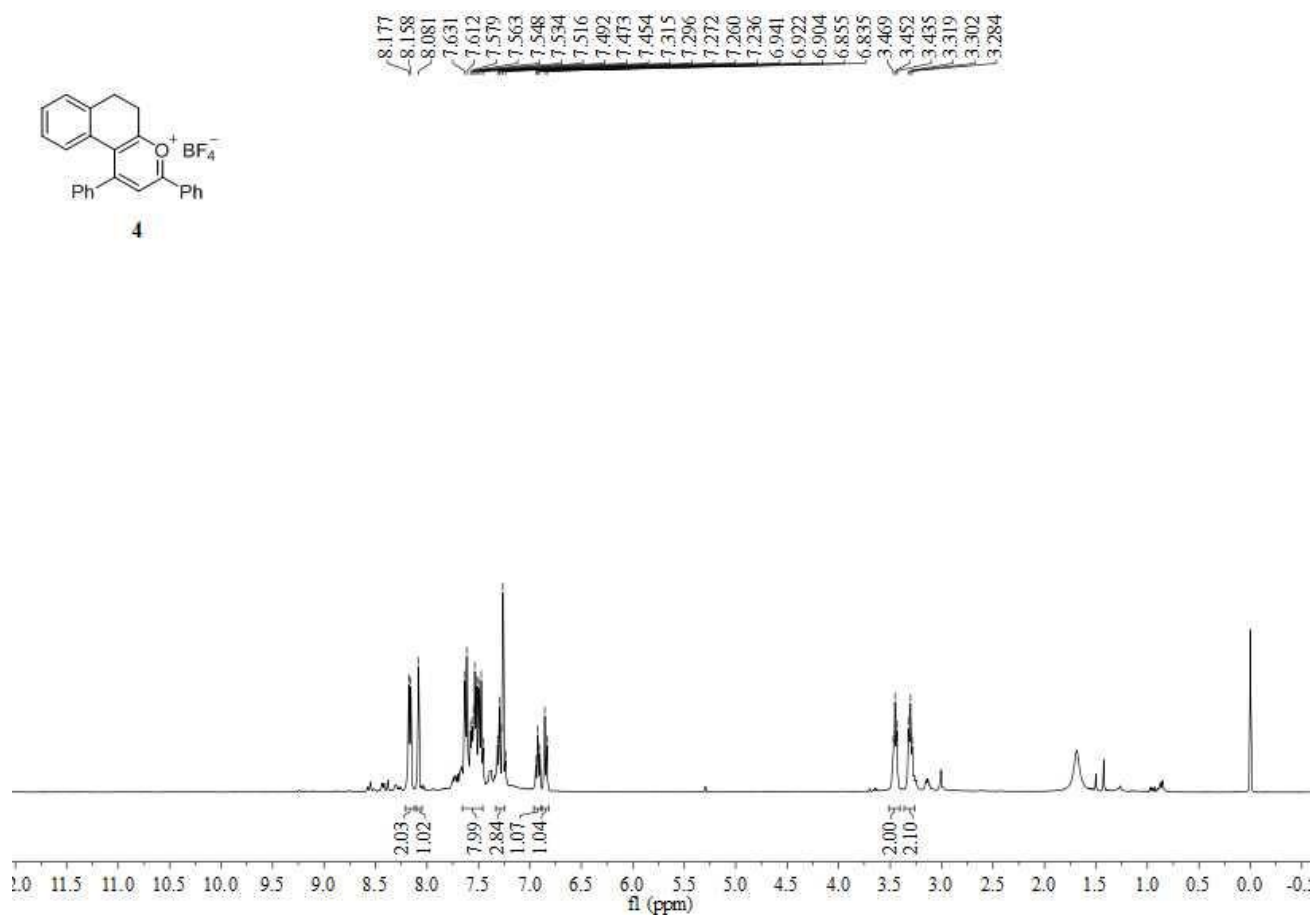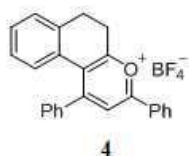

4

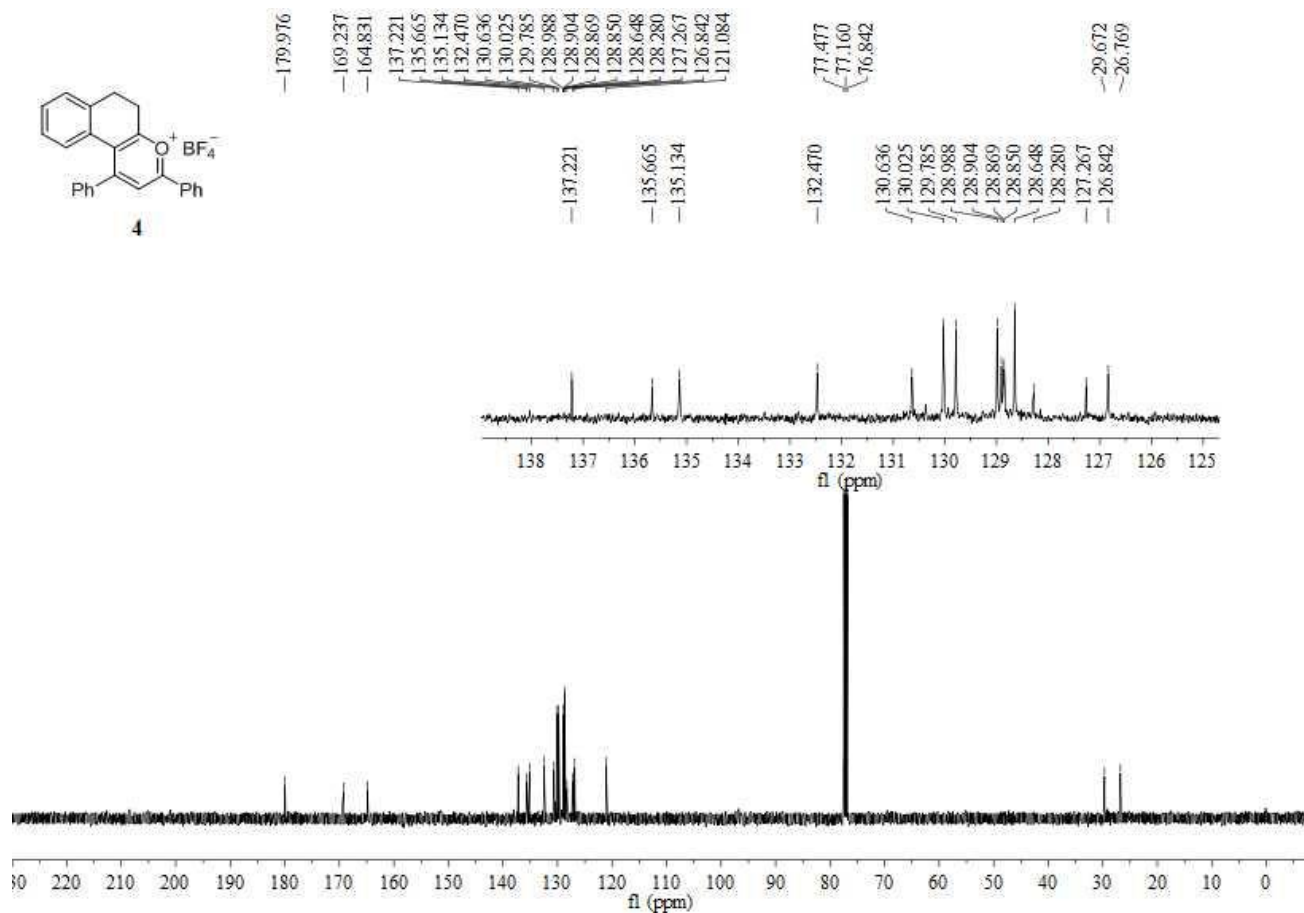

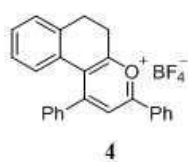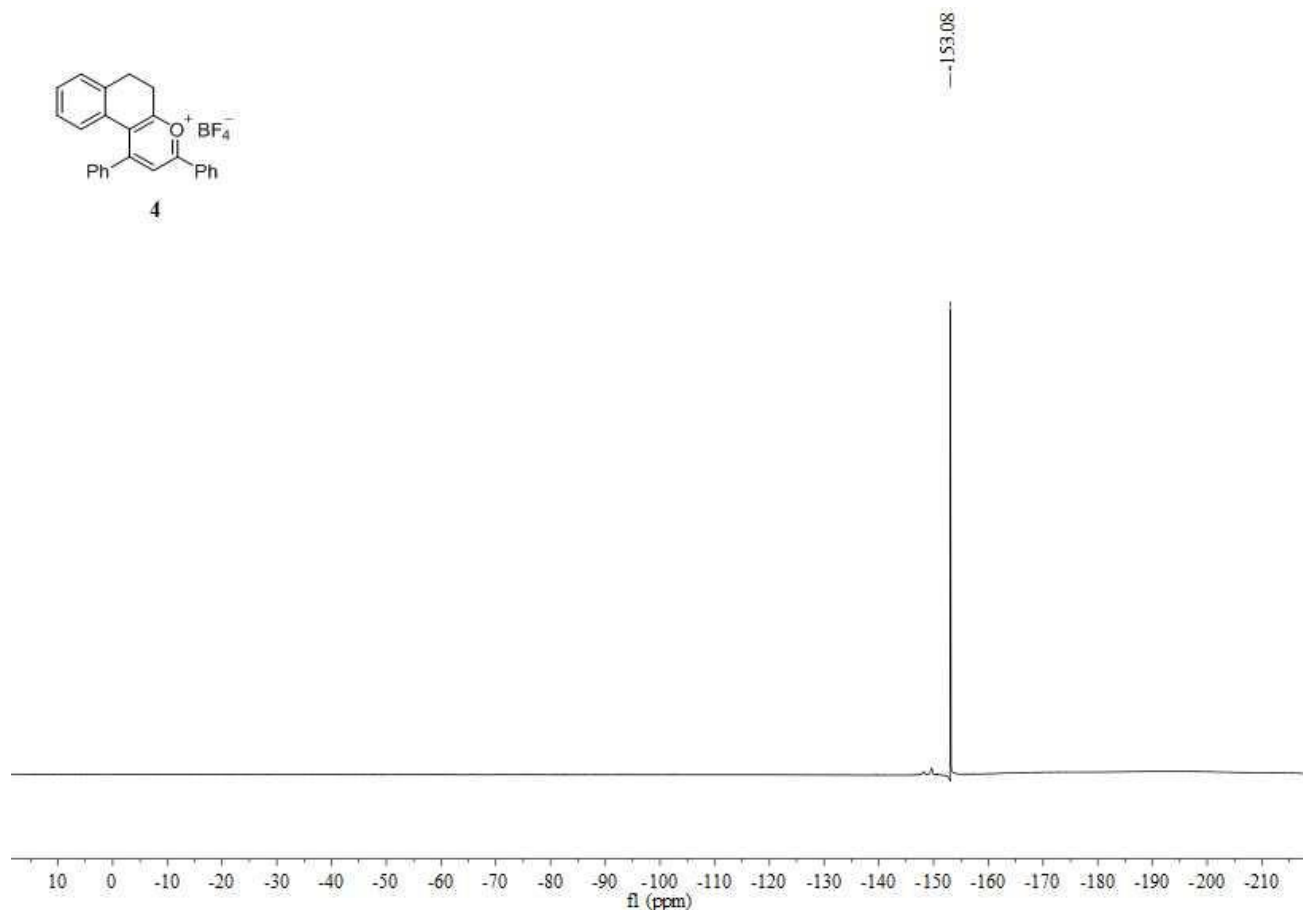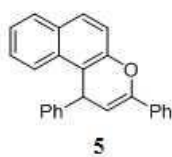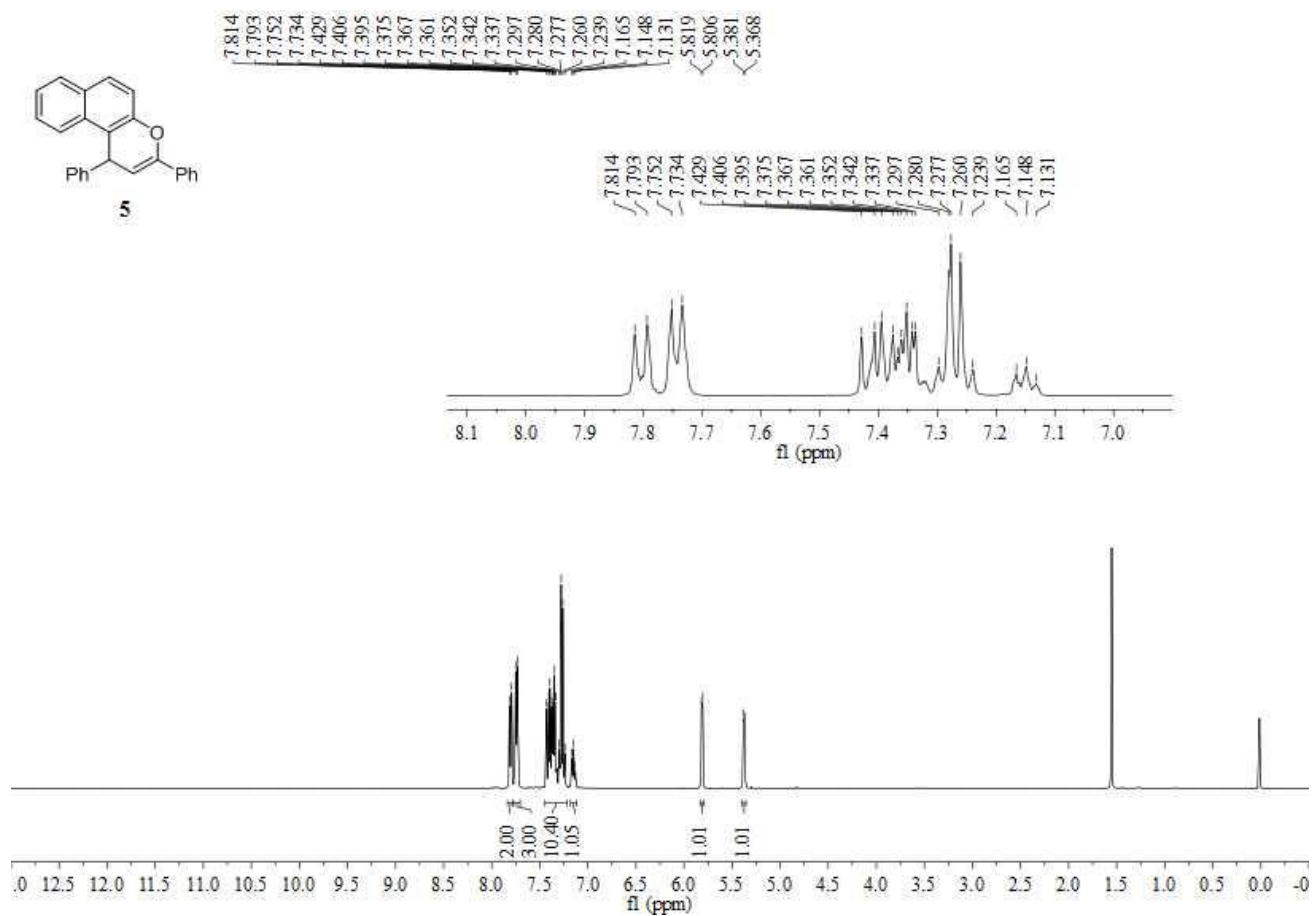



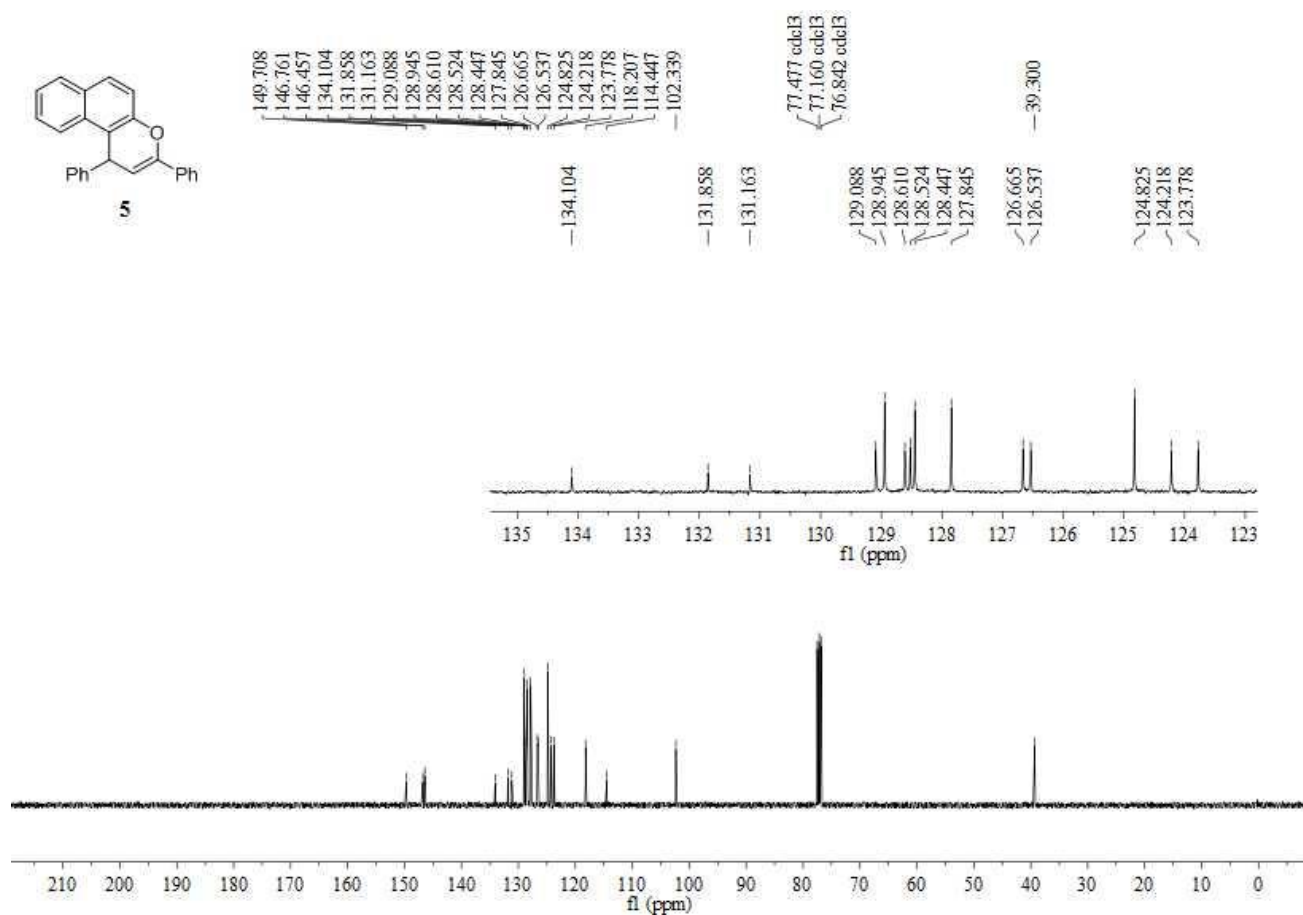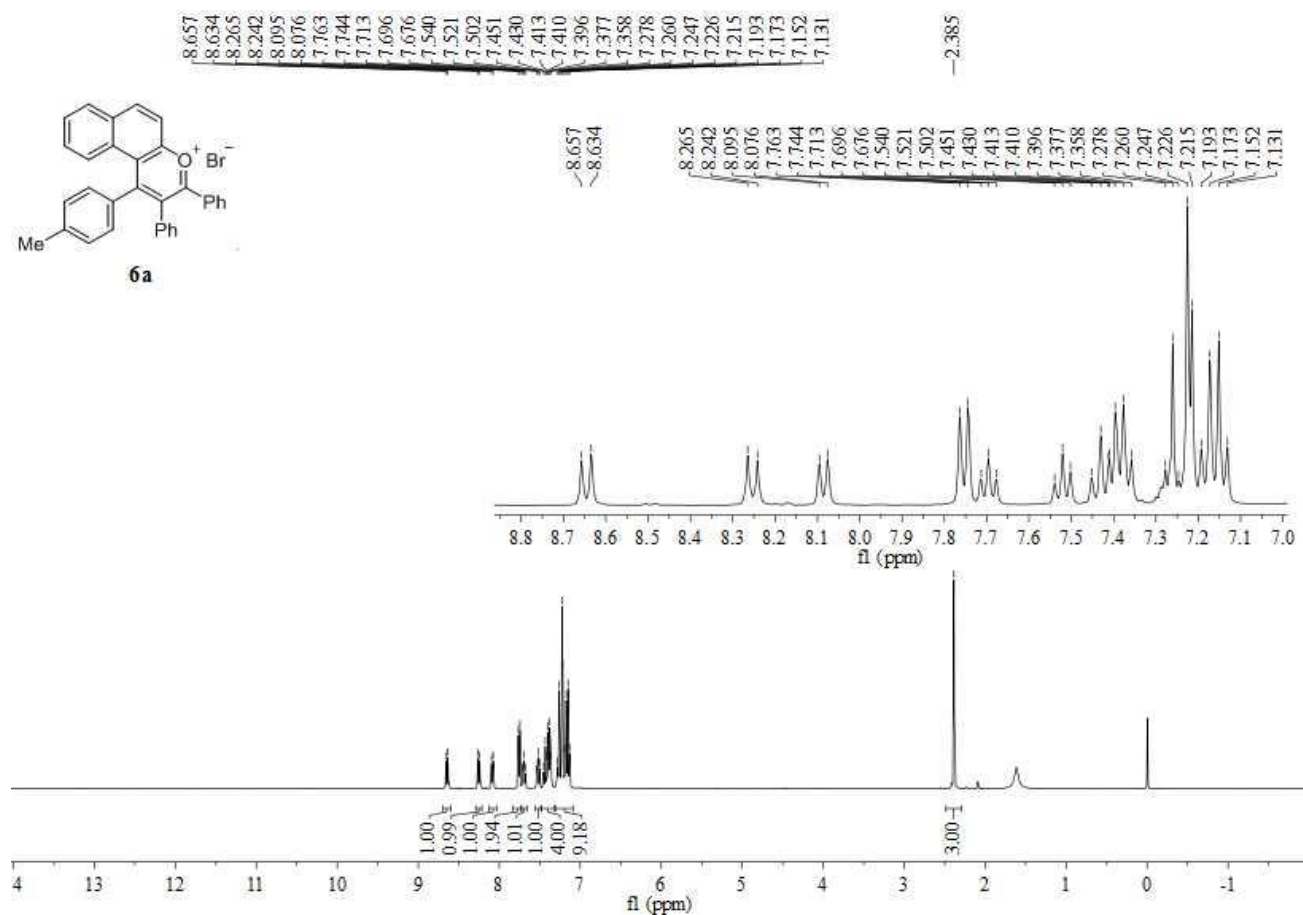

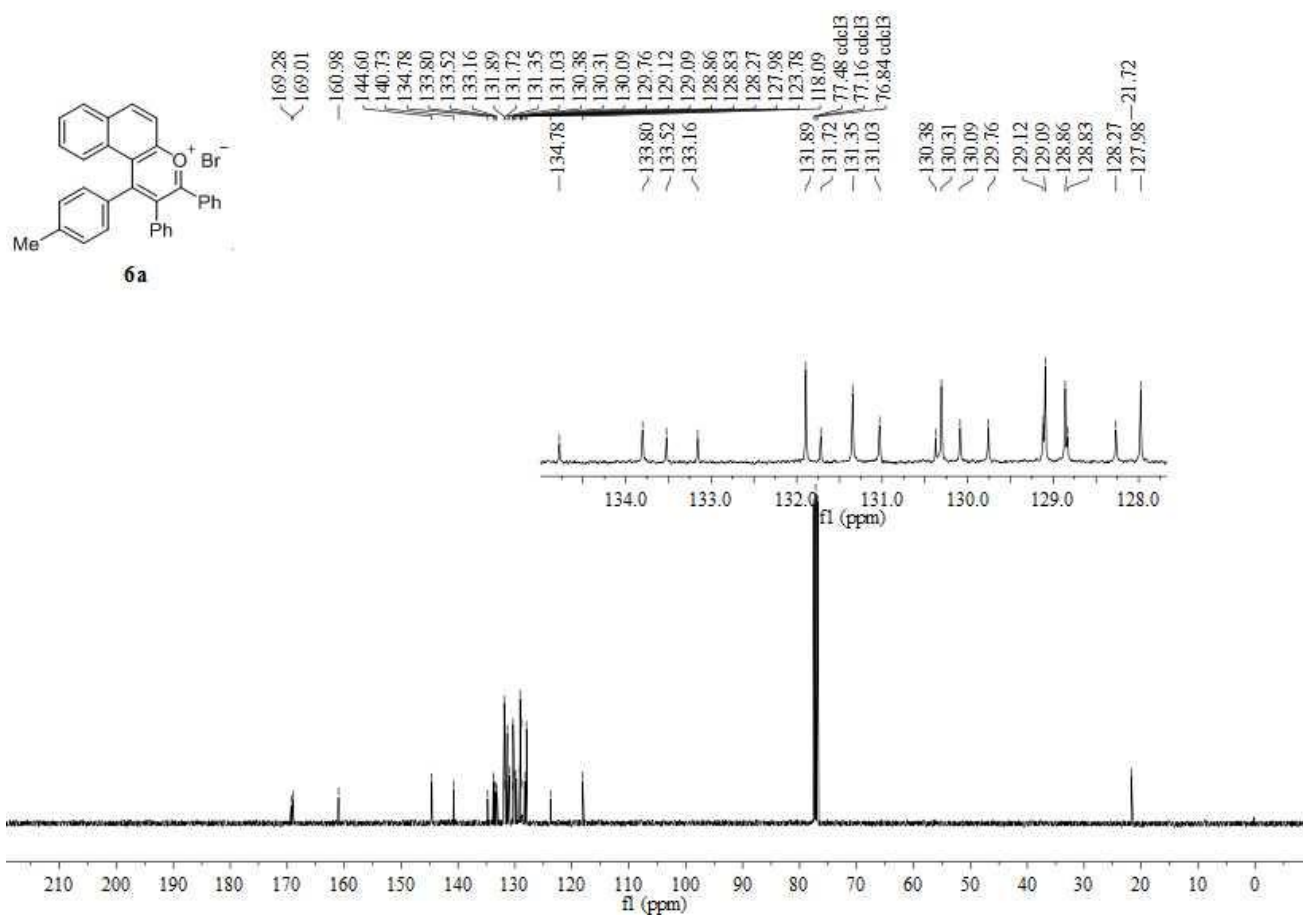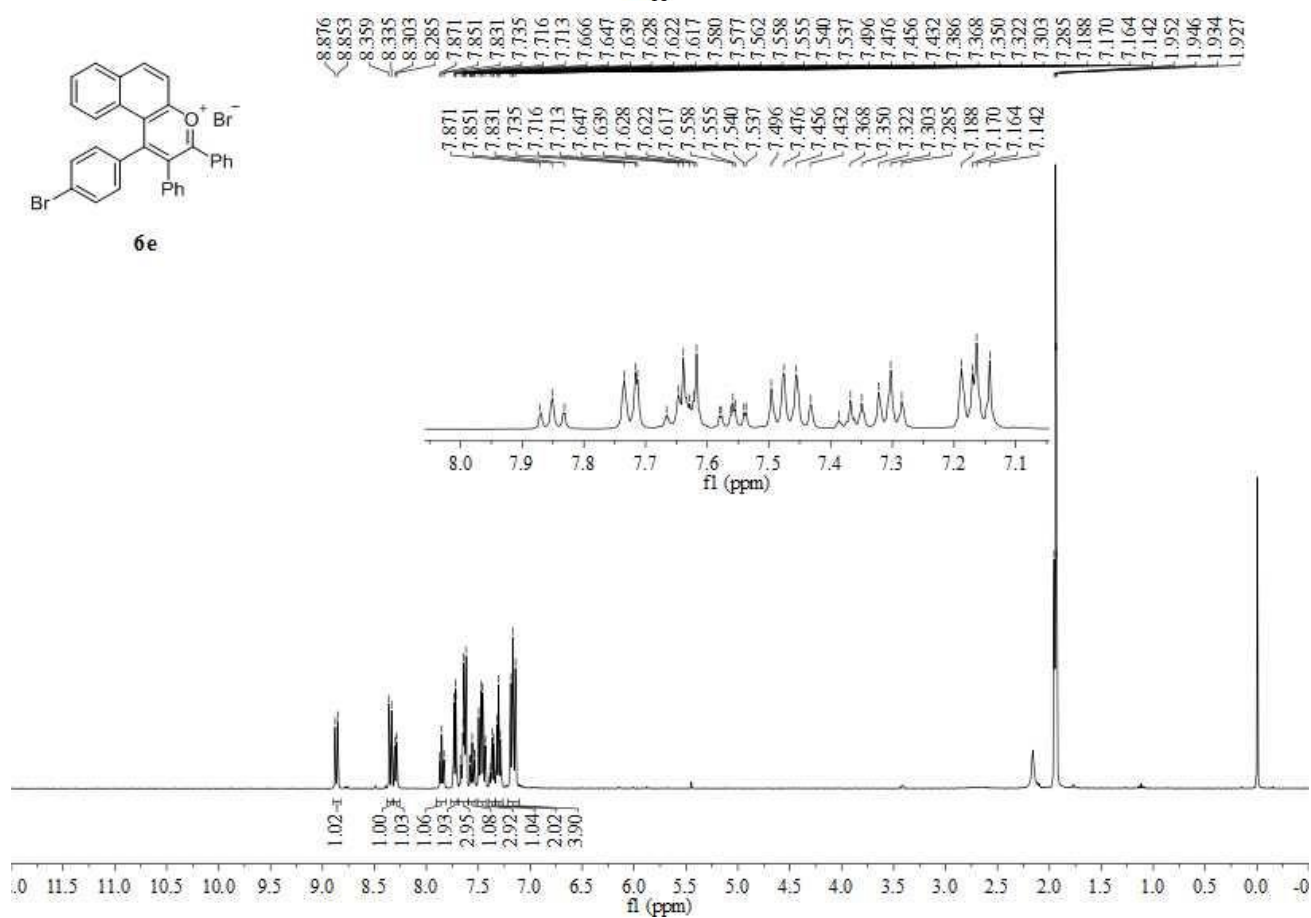

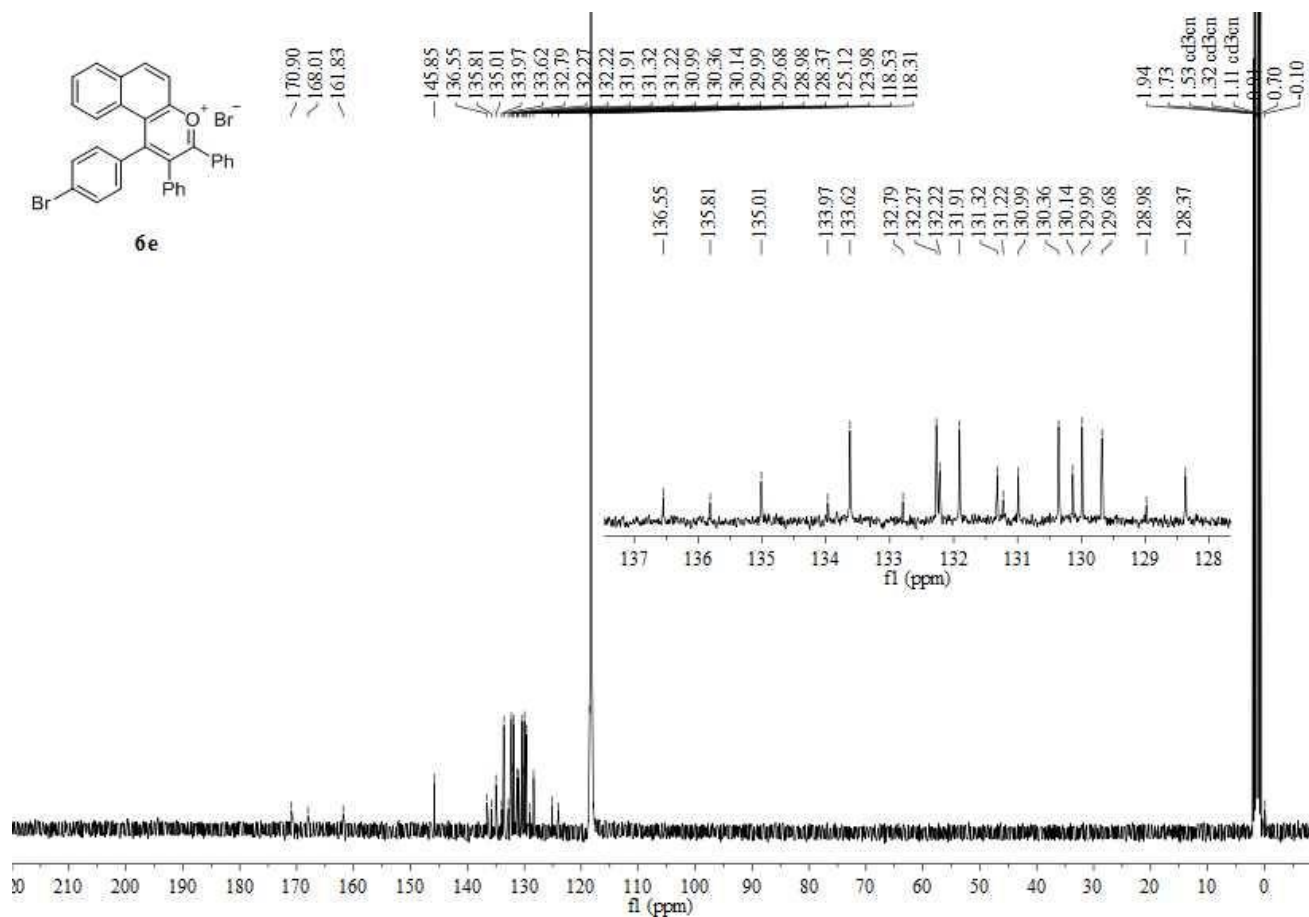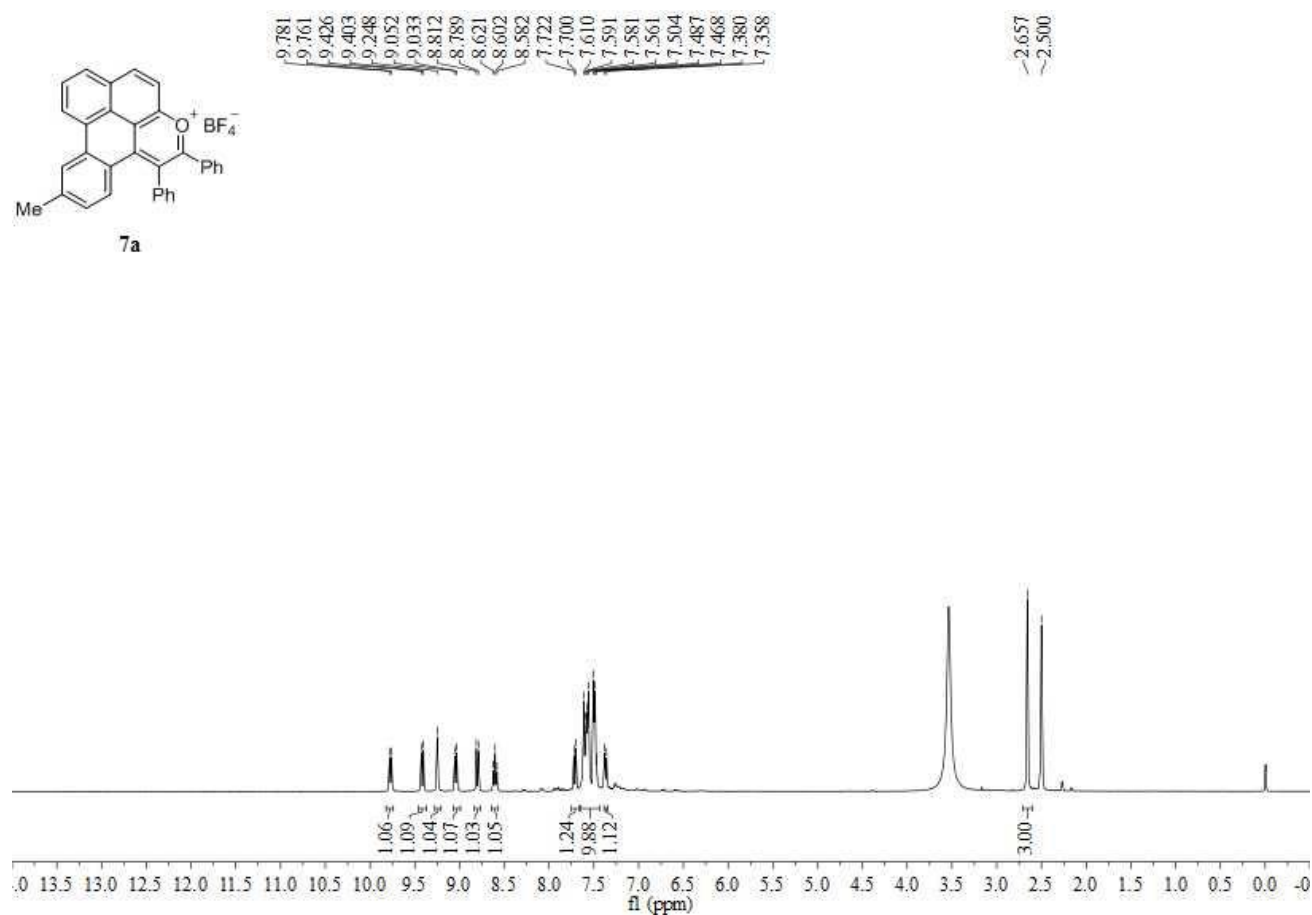

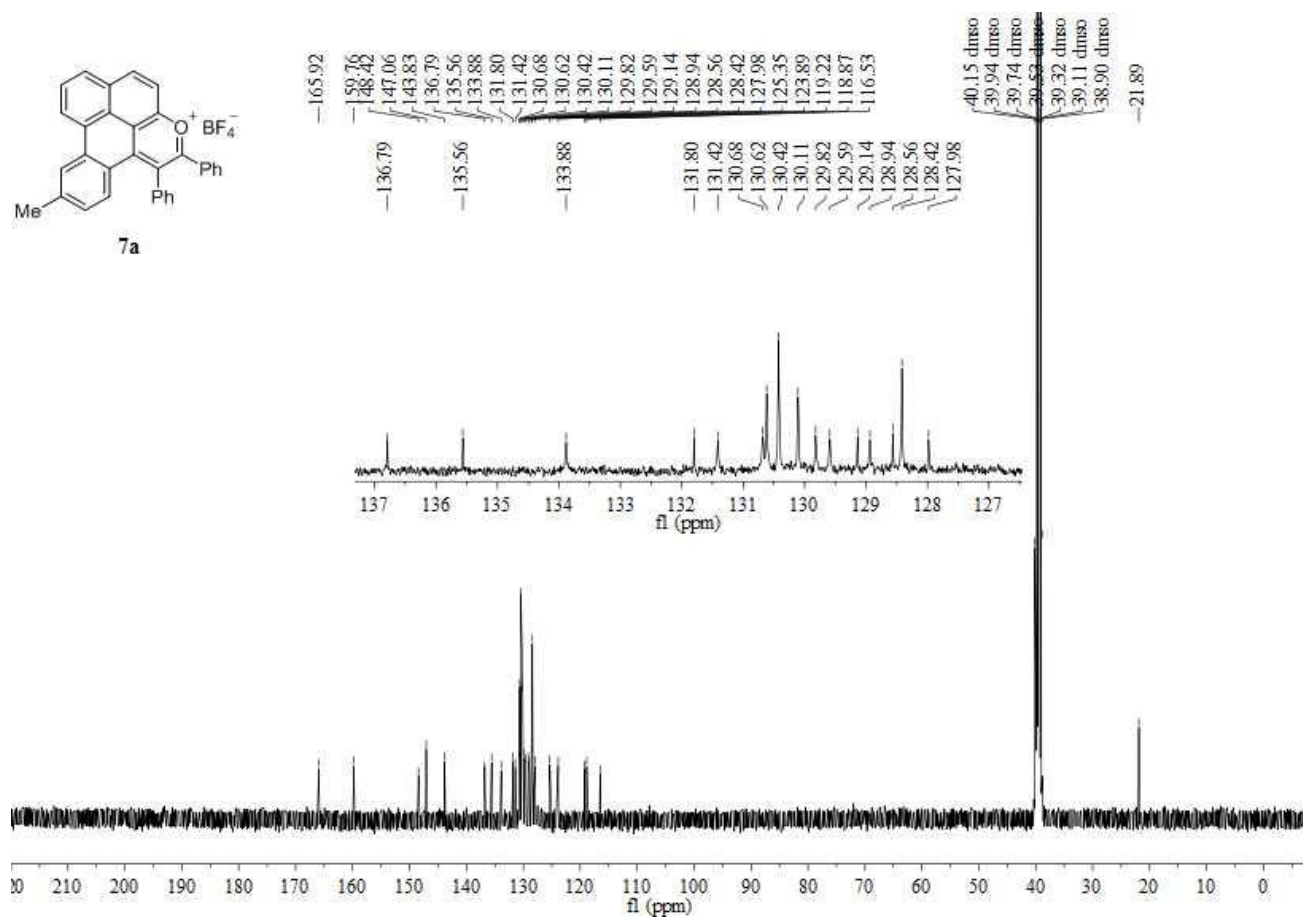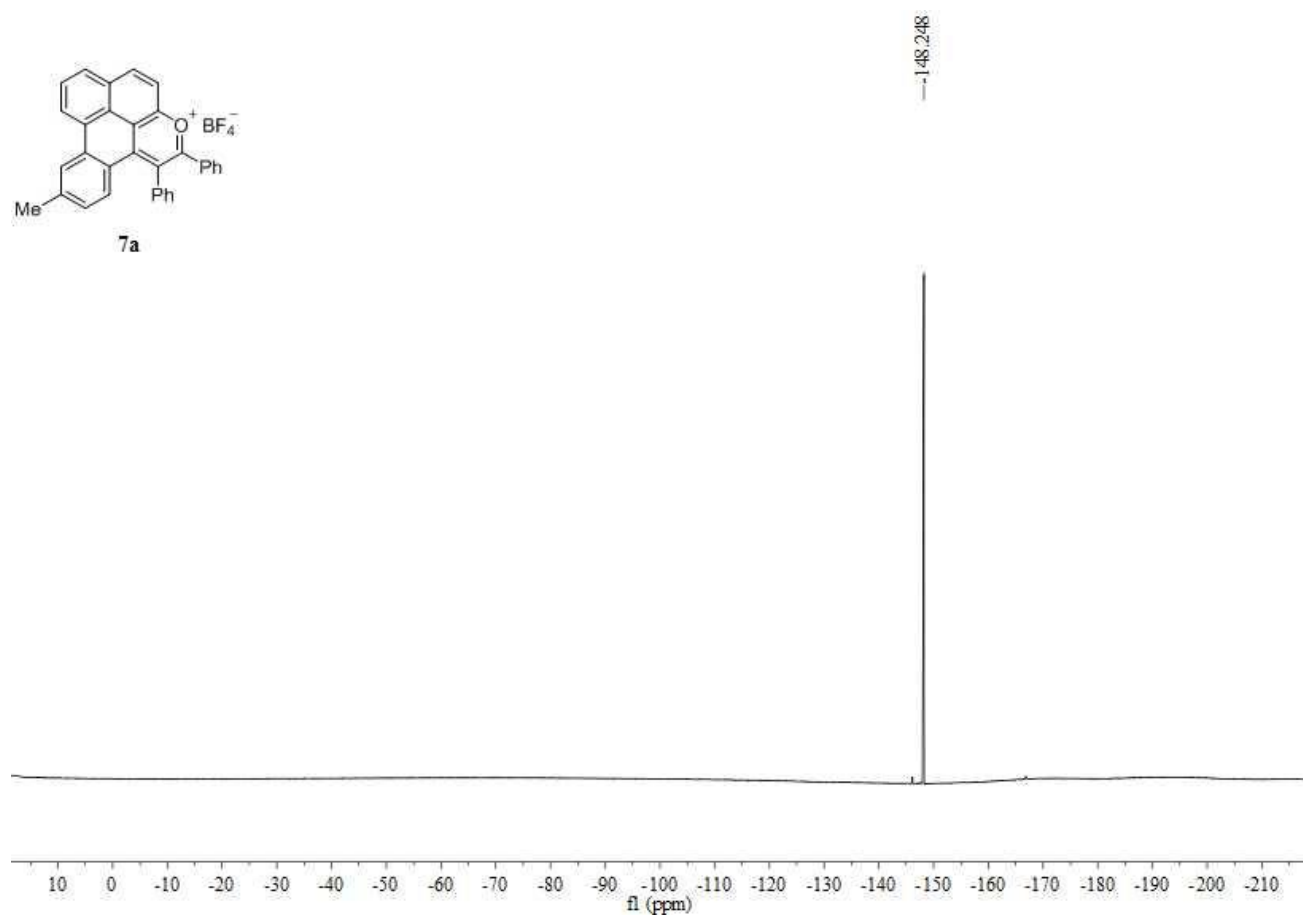

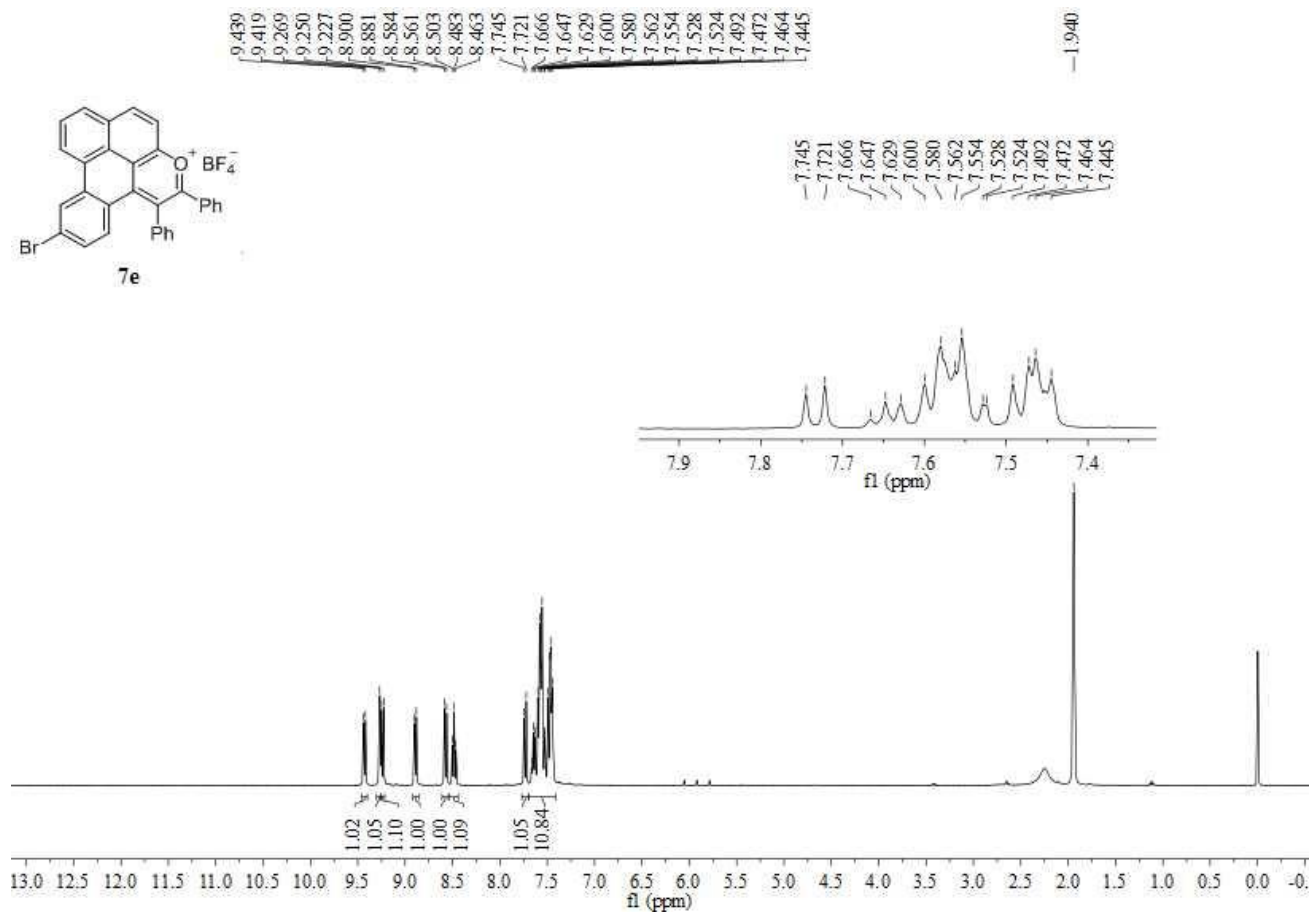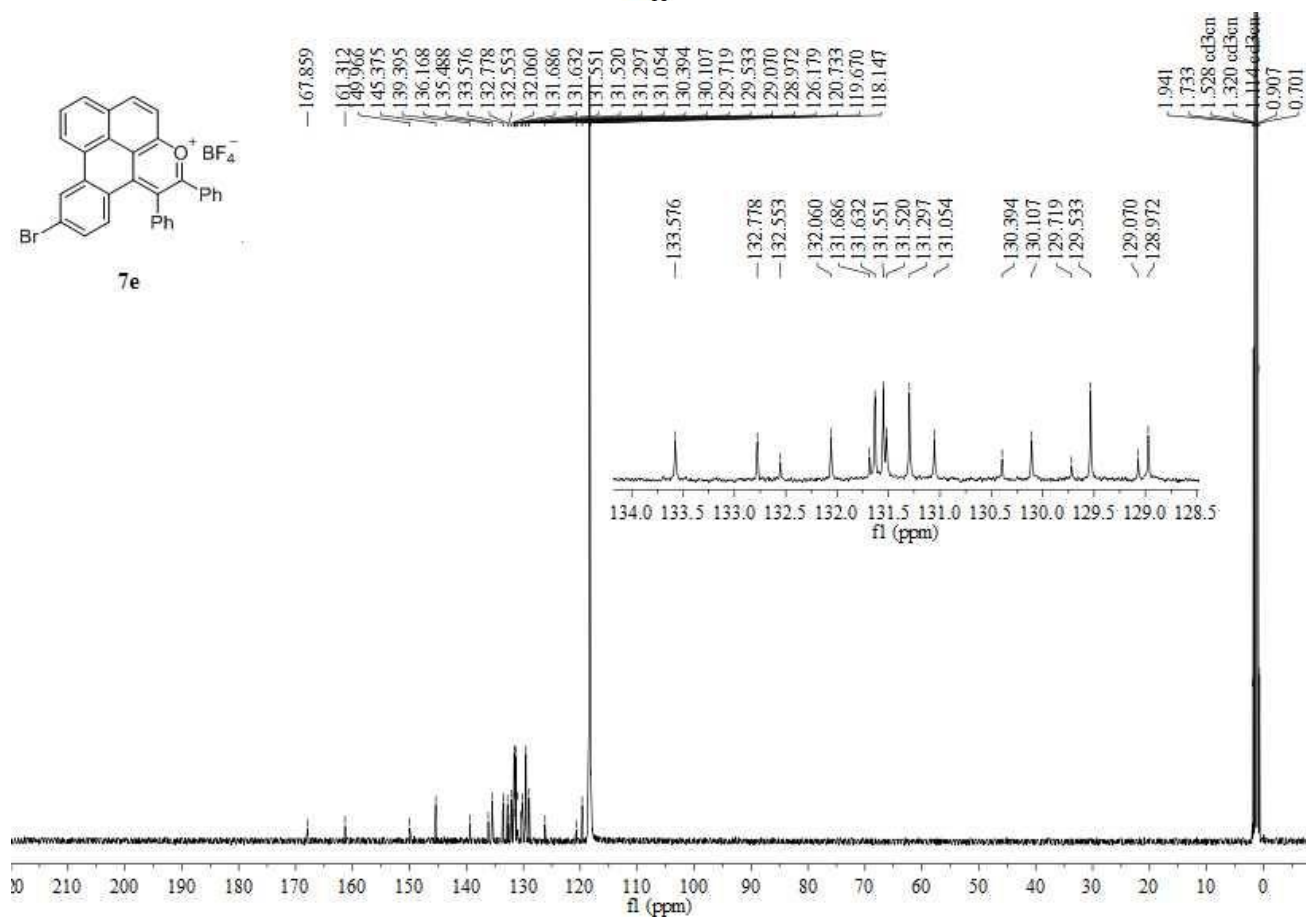

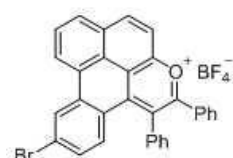

7e

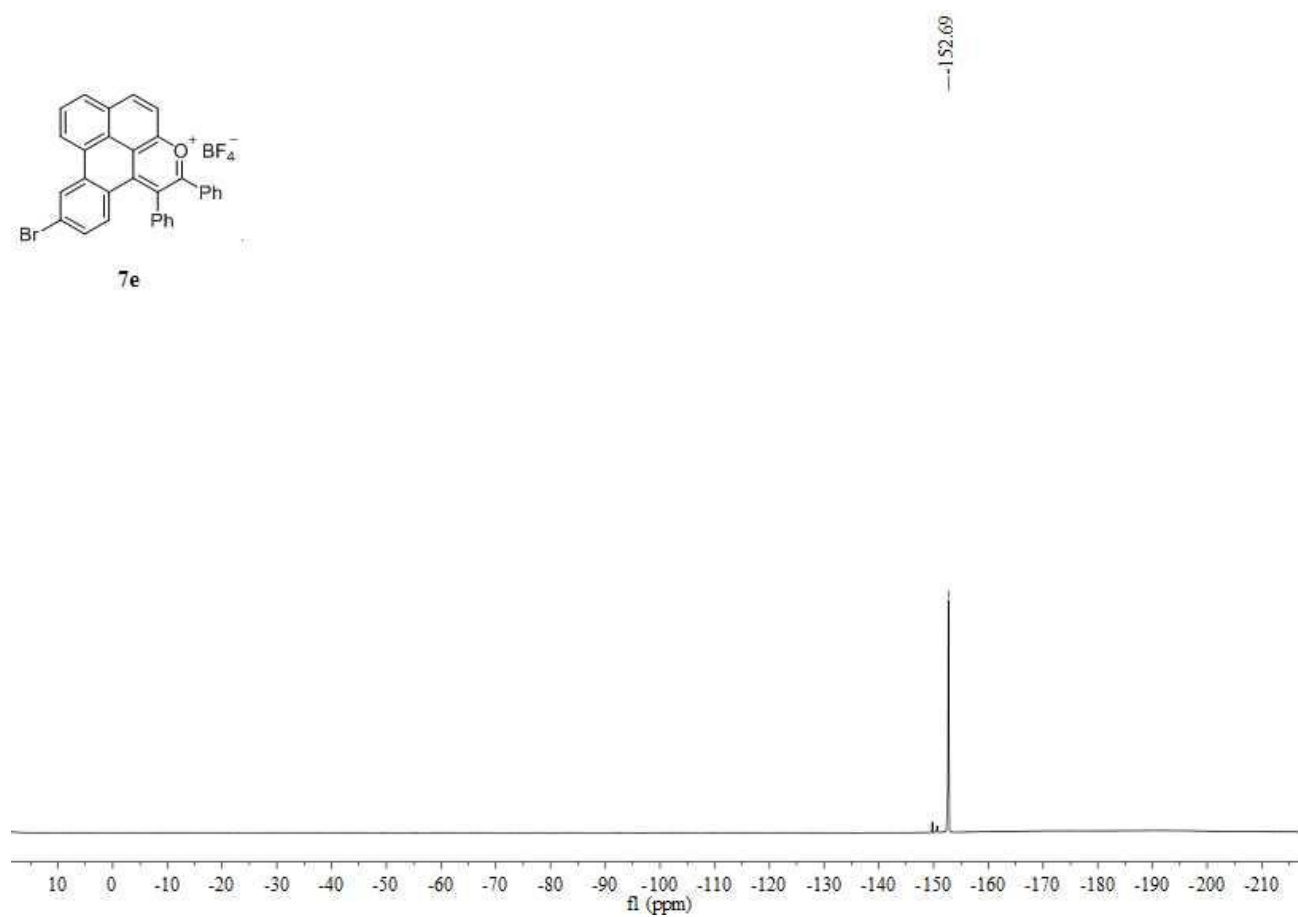

Supplement: Supplementary file 1 [file 10325058]
